# Supplementary material for: Synthesis of 2,3,5,6-tetrasubstituted tetrahydropyrans via (3,5)-oxonium-ene reaction
Source: Royal Society of Chemistry journal article supplement (doi:10.1039/c2ob06832j), 2012-01-01
Supplement: c2ob06832j.pdf [file c2ob06832j.pdf]

## Supporting Information for Publication

### Synthesis of 2,3,5,6-Tetrasubstituted Tetrahydropyrans via (3,5)-Oxonium-Ene Reaction

Pipas Saha, Anup Bhunia and Anil K. Saikia\*

Department of Chemistry, Indian Institute of Technology Guwahati, Guwahati 781039, India

Fax: +91 361 2690762; e-mail: asaikia@iitg.ernet.in

#### Table of content:

- |                                                                                                                                         |                  |
|-----------------------------------------------------------------------------------------------------------------------------------------|------------------|
| 1. General preparation of the starting materials<br><b>B1-3</b> and <b>1a-d</b> and their spectral data                                 | <b>S2-S7</b>     |
| 2. <sup>1</sup> H, <sup>13</sup> C spectra of all compounds and<br><sup>19</sup> F NMR spectrum of <b>3e</b> , <b>4e</b> and <b>11d</b> | <b>S8-S120</b>   |
| 3. The Crystal parameters and ORTEP diagrams of<br>compounds <b>4g</b> , <b>11f</b> , <b>13</b> and <b>14</b>                           | <b>S121-S124</b> |

**General Information:** All reagents are commercially obtained.  $\text{BF}_3 \cdot \text{Et}_2\text{O}$  was distilled over  $\text{CaH}_2$  prior to use.  $^1\text{H}$  NMR spectra were recorded in  $\text{CDCl}_3$  on 400 MHz NMR spectrometer using TMS as internal standard. The  $^{13}\text{C}$  and  $^{19}\text{F}$  NMR spectra were recorded at 100 MHz and 376 MHz, respectively. For  $^{13}\text{C}$  and  $^{19}\text{F}$  NMR  $\text{CDCl}_3$  and  $\text{C}_6\text{F}_6$  were used as internal standard. IR spectra were recorded on FT-IR spectrometer. Melting points were measured in open capillary tubes and are uncorrected.

**Preparation of ethyl 2-(1-hydroxyalkyl/hydroxy(phenyl)methyl)-5-methylhex-4-enoate**

**1:** The ethyl 2-(1-hydroxyalkyl/hydroxy(phenyl)methyl)-5-methylhex-4-enoate **1** was synthesized starting from  $\beta$ -keto ester **A** and 1-bromo-3-methylbut-2-ene as shown in Scheme 1.<sup>1</sup> Thus the reaction of  $\beta$ -keto ester **A** with 1-bromo-3-methylbut-2-ene in presence

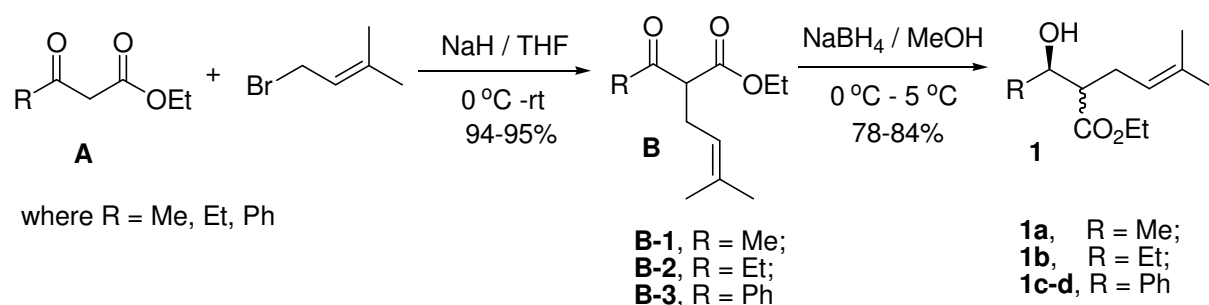

**Scheme 1:** Synthesis of ethyl 2-(1-hydroxyalkyl/hydroxy(phenyl)methyl)-5-methylhex-4-enoate

of sodium hydride in THF afforded  $\alpha$ -substituted  $\beta$ -keto ester **B**, which after reduction with sodium borohydride in methanol gives alcohol **1** in 78-84% yields.

The methyl and ethyl substituted  $\beta$ -keto esters **B-1** and **B-2** afforded two inseparable diastereomers<sup>2</sup> **1a,b** whereas phenyl substituted  $\beta$ -ketoester **B-3** gave two separable *anti*- and *syn*-diastereomers **1c** and **1d**, respectively. The structures of all compounds are determined

from IR,  $^1\text{H}$ ,  $^{13}\text{C}$  NMR and mass spectroscopy. The stereochemistry of compounds **1c** and **1d** are determined from coupling constants values.<sup>2b,3</sup>

References:

1. M. Peña-López, M. M. Martinez, L. A. Sarandeses and J. S. Sestelo, *J. Org. Chem.* 2010, **75**, 5337-5339.
2. (a) V. A. Kramer and H. Pfander, *Helv. Chim. Acta* 1982, **65**, 293-301; (b) P. Galatsis, S. D. Millan, P. Nechala and G. Ferguson, *J. Org. Chem.* 1994, **59**, 6643-6651.
3. E. Marcantoni, S. Alessandrini, M. Malavolta, G. Bartoli, M. C. Bellucci and L. Sambri, *J. Org. Chem.* 1999, **64**, 1986-1992.

**General procedure for the synthesis of  $\alpha$ -alkyl- $\beta$ -keto esters (B-1-3):** To a suspension of sodium hydride (15.69 mmol, 1 equiv.) in THF (15 mL) at 0 °C was added  $\beta$ -keto ester (15.69 mmol, 1 equiv.) dropwise via syringe. After 20 min, a solution of 3,3-dimethylallyl bromide (17.26 mmol, 1.1 equiv.) in THF (5 mL) was added and the mixture was left at room temperature overnight. The solvent was removed under reduced pressure, and the residue was dissolved in Et<sub>2</sub>O (10 mL) and washed with brine (25 ml). The organic layer was dried and filtered, and the filtrate was concentrated under reduced pressure. The residue was purified by column chromatography over silica gel to afford the title compounds as colourless oil.

**Synthesis of Ethyl 2-acetyl-5-methylhex-4-enoate (B-1):** To a suspension of sodium hydride (0.378 g, 15.69 mmol) in THF (15 mL) at 0 °C was added ethyl acetoacetate (2 mL, 15.69 mmol) dropwise via syringe. After 20 min, a solution of 3,3-dimethylallyl bromide (2 mL, 17.26 mmol) in THF (5 mL) was added and the mixture was left at room temperature overnight. The solvent was removed under reduced pressure, and the residue was dissolved in Et<sub>2</sub>O (10 mL) and washed with brine (25 mL). The organic layer was dried and filtered, and

chromatography over silica gel (10% EtOAc/hexane) to afford ethyl 2-acetyl-5-methylhex-4-enoate **B-1** (2.97 g, 95%) as a colourless oil;  $^1\text{H}$  NMR (400 MHz,  $\text{CDCl}_3$ ):  $\delta$  1.27 (t,  $J = 7.2$  Hz, 3 H), 1.63 (s, 3 H), 1.68 (s, 3 H), 2.22 (s, 3 H), 2.54 (t,  $J = 7.2$  Hz, 2 H), 3.43 (t,  $J = 7.6$  Hz, 1 H), 4.19 (q,  $J = 7.2$  Hz, 2 H), 5.03 (dt,  $J = 7.6$  and 1.6 Hz, 1 H);  $^{13}\text{C}$  NMR (100 MHz,  $\text{CDCl}_3$ ):  $\delta$  14.1, 17.8, 25.8, 27.0, 29.1, 59.8, 61.3, 119.9, 134.7, 169.7, 203.2; IR (KBr, Neat): 2981, 2930, 1739, 1718, 1205, 1150  $\text{cm}^{-1}$ . HRMS (APCI) cald. for  $\text{C}_{11}\text{H}_{18}\text{O}_3$  ( $\text{M}+\text{H}$ ) $^+$  requires 199.1334; found 199.1337. APCI-MS:  $m/z$  (relative intensity): 199.2 ( $(\text{M}+\text{H})^+$ , 43%), 181.1 (100), 169.1 (55), 143.1 (17), 124.1 (43), 107.1 (73).

**Ethyl 5-methyl-2-propionylhex-4-enoate (B-2):** Colourless oil (3.13 g, 94%);  $^1\text{H}$  NMR (400 MHz,  $\text{CDCl}_3$ ):  $\delta$  1.06 (t,  $J = 7.2$  Hz, 3 H), 1.26 (t,  $J = 7.2$ , 3 H), 1.62 (s, 3 H), 1.67 (s, 3 H), 2.47-2.60 (m, 4 H), 3.45 (t,  $J = 7.2$  Hz, 1 H), 4.17 (q,  $J = 7.2$  Hz, 2 H), 5.02 (dt,  $J = 7.6$  and 1.6 Hz, 1 H);  $^{13}\text{C}$  NMR (100 MHz,  $\text{CDCl}_3$ ):  $\delta$  7.8, 14.2, 17.9, 25.9, 27.2, 35.6, 58.9, 61.4, 120.1, 134.8, 169.9, 206.0; IR (KBr, Neat): 2980, 2937, 1741, 1716, 1198, 1156  $\text{cm}^{-1}$ . HRMS (APCI) cald. for  $\text{C}_{12}\text{H}_{20}\text{O}_3$  ( $\text{M}^+$ ) requires 212.1412; found 212.1408. APCI-MS:  $m/z$  (relative intensity): 212.2 ( $(\text{M}+\text{H})^+$ , 100%), 194.7 (65), 168.7 (27), 123.8 (22).

**Ethyl 2-benzoyl-5-methylhex-4-enoate (B-3):** Colourless oil (3.88 g, 95%);  $^1\text{H}$  NMR (400 MHz,  $\text{CDCl}_3$ ):  $\delta$  1.67 (t,  $J = 7.2$  Hz, 3 H), 1.62 (s, 3 H), 1.65 (s, 3 H), 2.61-2.78 (m, 2 H), 4.14 (q,  $J = 7.2$  Hz, 2 H), 4.30 (t,  $J = 7.2$  Hz, 1 H), 5.11 (dt,  $J = 7.2$  and 1.6 Hz, 1 H), 7.44-7.50 (m, 2 H), 7.55-7.61 (m, 1 H), 7.97-8.00 (m, 2 H);  $^{13}\text{C}$  NMR (100 MHz,  $\text{CDCl}_3$ ):  $\delta$  14.1, 17.9, 25.8, 27.8, 54.6, 61.4, 120.3, 128.7, 128.8, 133.5, 134.7, 136.4, 169.9, 195.2; IR (KBr, Neat): 2979, 2929, 1737, 1688, 1448, 1379, 1241, 1153  $\text{cm}^{-1}$ . HRMS (APCI) cald. for  $\text{C}_{16}\text{H}_{20}\text{O}_3$  ( $\text{M}+\text{H}$ ) $^+$  requires 261.1490; found 261.1494. APCI-MS:  $m/z$  (relative intensity): 261.2 ( $(\text{M}+\text{H})^+$ , 57%), 215.1 (21), 193.1 (23), 169.1 (12), 124.1 (100).



**General procedure for the synthesis of Ethyl 2-(1-hydroxyalkyl/hydroxy(phenyl)methyl)-5-methylhex-4-enoate (1a-d):** To a solution of  $\alpha$ -alkyl- $\beta$ -keto esters (14.98 mmol, 1 equiv.) in dry MeOH (15 mL) at 0 °C, was added sodium borohydride (39.25 mmol, 2.62 equiv.) in small portions. The reaction mixture was stirred in between 0 °C to 5 °C for 1.5 h. The progress of the reaction was monitored by TLC with ethyl acetate and hexane as eluents. After completion of the reaction, the product was extracted with ethyl acetate (30 mL) and then washed with water (15 mL) and brine (15 mL). The organic layer was dried (Na<sub>2</sub>SO<sub>4</sub>) and evaporated to leave the crude product, which was purified by column chromatography over silica gel to give the title compounds.

**Synthesis of Ethyl 2-(1-hydroxyethyl)-5-methylhex-4-enoate (1a):** To a solution of ethyl 2-acetyl-5-methylhex-4-enoate (2.97 g, 14.98 mmol) in dry MeOH (15mL) at 0 °C, was added sodium borohydride (1.485 g, 39.25 mmol) in small portions. The reaction mixture was stirred in between 0 °C to 5 °C for 1.5 h. The progress of the reaction was monitored by TLC with ethyl acetate and hexane (3:22) as eluents. After completion of the reaction, the product was extracted with ethyl acetate (30 mL) and then washed with water (15 mL) and brine (15 mL). The organic layer was dried (Na<sub>2</sub>SO<sub>4</sub>) and evaporated to leave the crude products, which were purified by column chromatography over silica gel to give an inseparable mixture of two diastereomers **1a** (2.40 g, 80% overall yield) as a colourless oil; <sup>1</sup>H NMR (400 MHz, CDCl<sub>3</sub>):  $\delta$  1.19-1.29 (m, 6 H), 1.62 (s, 3 H), 1.69 (s, 3 H), 2.29-2.47 (m, 3 H), 2.51 (brs 0.5 H), 2.69 (brs, 0.5 H), 3.86-3.96 (m, 0.5 H), 3.98-4.06 (m, 0.5 H), 4.08-4.24 (m, 2 H), 5.04-5.14 (m, 1 H); <sup>13</sup>C NMR (100 MHz, CDCl<sub>3</sub>):  $\delta$  14.1(2C), 17.5(2C), 20.5, 21.1, 25.6(2C), 26.7, 27.7, 53.0, 53.1, 60.2, 60.3, 67.8, 67.9, 120.5, 121.1, 133.3, 133.6, 174.7, 175.0; IR (KBr, Neat): 3441, 2972, 2929, 1732, 1640, 1182, 1155 cm<sup>-1</sup>. HRMS (APCI) calcd. for C<sub>11</sub>H<sub>20</sub>O<sub>3</sub> (M+H)<sup>+</sup> requires 201.1490; found 201.1498. APCI-MS: m/z (relative intensity):

201.2 ((M+H)<sup>+</sup>, 30%), 137.1 (4), 125.1 (11), 124.1 (100), 123.1 (14), 82.0 (24).

**Ethyl 2-(1-hydroxypropyl)-5-methylhex-4-enoate (1b):** Colourless oil (2.50 g, 78%); <sup>1</sup>H NMR (400 MHz, CDCl<sub>3</sub>): δ 0.98 (t, *J* = 7.6 Hz, 3 H), 1.25 (t, *J* = 7.2 Hz, 1.5 H), 1.26 (t, *J* = 7.2 Hz, 1.5 H), 1.45-1.54 (m, 2H), 1.61 (s, 1.5 H), 1.62 (s, 1.5 H), 1.69 (s, 3 H), 2.28-2.50 (m, 3 H), 2.67 (brs, 1 H), 3.56-3.64 (m, 0.5 H), 3.70-3.78 (m, 0.5 H), 4.08-4.22 (m, 2 H), 5.04-5.16 (m, 1 H); <sup>13</sup>C NMR (100 MHz, CDCl<sub>3</sub>): δ 10.2, 10.3, 14.3(2C), 17.8(2C), 25.8, 26.1, 27.4(2C), 28.3, 28.6, 50.7, 51.2, 60.5(2C), 73.3, 73.4, 120.7, 121.3, 133.6, 134.1, 175.3, 175.5; IR (KBr, Neat): 3456, 2968, 2932, 1731, 1642, 1183, 1159 cm<sup>-1</sup>. HRMS (APCI) calcd. for C<sub>12</sub>H<sub>22</sub>O<sub>3</sub> (M+H)<sup>+</sup> requires 215.1647; found 215.1653. APCI-MS: m/z (relative intensity): 215.2 ((M+H)<sup>+</sup>, 100%), 197.2 (6), 169.1 (8), 151.1 (7), 124.1 (35), 123.1 (14), 82.0 (7).

**Synthesis of *anti/syn*-Ethyl 2-(hydroxy(phenyl)methyl)-5-methylhex-4-enoate (1c & 1d):**

To a solution of ethyl 2-benzoyl-5-methylhex-4-enoate (3.90 g, 14.98 mmol) in dry MeOH (15 mL) at 0 °C, was added sodium borohydride (1.485 g, 39.25 mmol) in small portions. The reaction mixture was stirred in between 0 °C to 5 °C for 1.5 h. The progress of the reaction was monitored by TLC with ethyl acetate and hexane (7:43) as eluents. After completion of the reaction, the product was extracted with ethyl acetate (30 mL) and then washed with water (15 mL) and brine (15 mL). The organic layer was dried (Na<sub>2</sub>SO<sub>4</sub>) and evaporated to leave the crude products, which were separated by column chromatography over silica gel to give **1c** (1.73 g, 44%) and **1d** (1.58 g, 40%) as a colourless oil.

***anti*-Ethyl 2-(hydroxy(phenyl)methyl)-5-methylhex-4-enoate (1c):** Colourless oil (1.73 g, 44%); <sup>1</sup>H NMR (400 MHz, CDCl<sub>3</sub>): δ 1.18 (t, *J* = 7.2 Hz, 3 H), 1.50 (s, 3 H), 1.65 (s, 3 H), 2.05 (ddd, *J* = 13.2, 7.6 and 5.6 Hz, 1 H), 2.25 (ddd, *J* = 14.8, 8.0 and 6.8 Hz, 1 H), 2.75 (ddd, *J* = 12.8, 8.8, 5.2 Hz, 1 H), 3.16 (d, *J* = 5.2 Hz, 1H), 4.11 (q, *J* = 7.2 Hz, 2 H), 4.80 (dd,

$J = 6.4$  and  $4.4$  Hz, 1H), 5.03 (dt,  $J = 6.8$  and  $1.2$  Hz, 1H), 7.26-7.37 (m, 5H);  $^{13}\text{C}$  NMR (100 MHz,  $\text{CDCl}_3$ ):  $\delta$  14.3, 17.8, 25.9, 28.4, 53.3, 60.7, 74.8, 120.2, 126.6, 128.0, 128.6, 134.3, 142.2, 175.2; IR (KBr, Neat): 3461, 2978, 2929, 1729, 1452, 1377, 1180, 1037, 766, 702  $\text{cm}^{-1}$ . HRMS (APCI) cald. for  $\text{C}_{16}\text{H}_{22}\text{O}_3$  ( $\text{M}^+$ ) requires 262.1569; found 262.1573. APCI-MS:  $m/z$  (relative intensity): 262.2 ( $\text{M}^+$ , 3%), 244.6 (15), 177.7 (15), 176.7 (100), 123.8 (22).

***syn*-Ethyl 2-(hydroxy(phenyl)methyl)-5-methylhex-4-enoate (1d)**: Colourless oil (1.58 g, 40%);  $^1\text{H}$  NMR (400 MHz,  $\text{CDCl}_3$ ):  $\delta$  1.11 (t,  $J = 7.2$  Hz, 3 H), 1.54 (s, 3 H), 1.64 (s, 3 H), 2.29 (ddd,  $J = 14.4$ , 8.8 and 5.8 Hz, 1 H), 2.46 (ddd,  $J = 14.4$ , 8.8 and 5.6 Hz, 1 H), 2.72 (ddd,  $J = 10.4$ , 5.6 and 4.4 Hz, 1 H), 3.03 (brs, 1H), 4.02 (q,  $J = 7.2$  Hz, 2 H), 4.95 (d,  $J = 5.6$  Hz, 1H), 5.04 (t,  $J = 6.8$  Hz, 1H), 7.24-7.39 (m, 5H);  $^{13}\text{C}$  NMR (100 MHz,  $\text{CDCl}_3$ ):  $\delta$  14.2, 17.8, 25.9, 26.1, 53.3, 60.7, 74.2, 121.1, 126.4, 127.8, 128.4, 134.0, 141.7, 175.0; IR (KBr, Neat): 3460, 2979, 2930, 1728, 1453, 1375, 1180, 1026, 767, 701  $\text{cm}^{-1}$ . HRMS (APCI) cald. for  $\text{C}_{16}\text{H}_{22}\text{O}_3$  ( $\text{M}+\text{H}^+$ ) requires 263.1647; found 263.1652. APCI-MS:  $m/z$  (relative intensity): 263.2 ( $(\text{M}+\text{H})^+$ , 19%), 192.1 (5), 178.1 (15), 177.1 (100), 171.1 (21), 131.1 (13), 124.1 (75).

### <sup>1</sup>H NMR spectra of B-1

```
PS_457_K
expl s2pu1
SAMPLE SPECIAL
date Mar 17 2011 temp not used
solvent CDCl3 gain not used
file /export/home/~ spin not used
ciftemp/AKS_PS_457~ hst 0.008
_K←fid pw90 19.700
ACQUISITION a1fa 20.000
sw 6389.8 FLAGS
at 1.998 il n
np 25528 in n
fb not used dp y
bs 8 hs nn
d1 1.000 PROCESSING
nt 100 lb 0.10
ct 100 fn 65536
TRANSMITTER DISPLAY
tn H1 sp -198.9
sfrq 399.853 wp 3627.1
tof 362.8 rfl 786.7
tpwr 57 rfp 0
pw 9.850 rp 124.8
DECOUPLER lp -45.5
dn C13 PLOT
dof 0 wc 250
dm nnn sc 0
dmm c vs 27
dpwr 50 th 2
dmf 15900 nm cdc ph
```

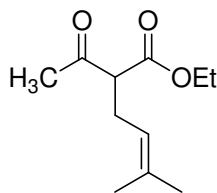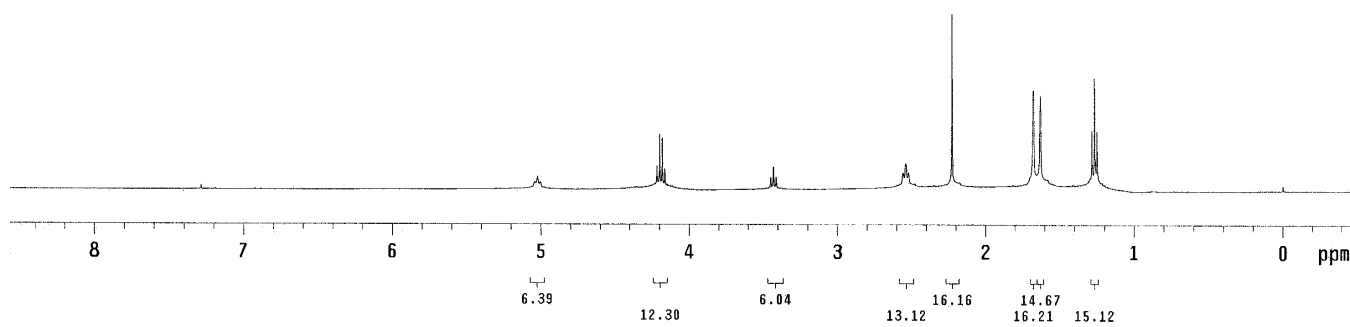

### <sup>13</sup>C NMR spectra of B-1

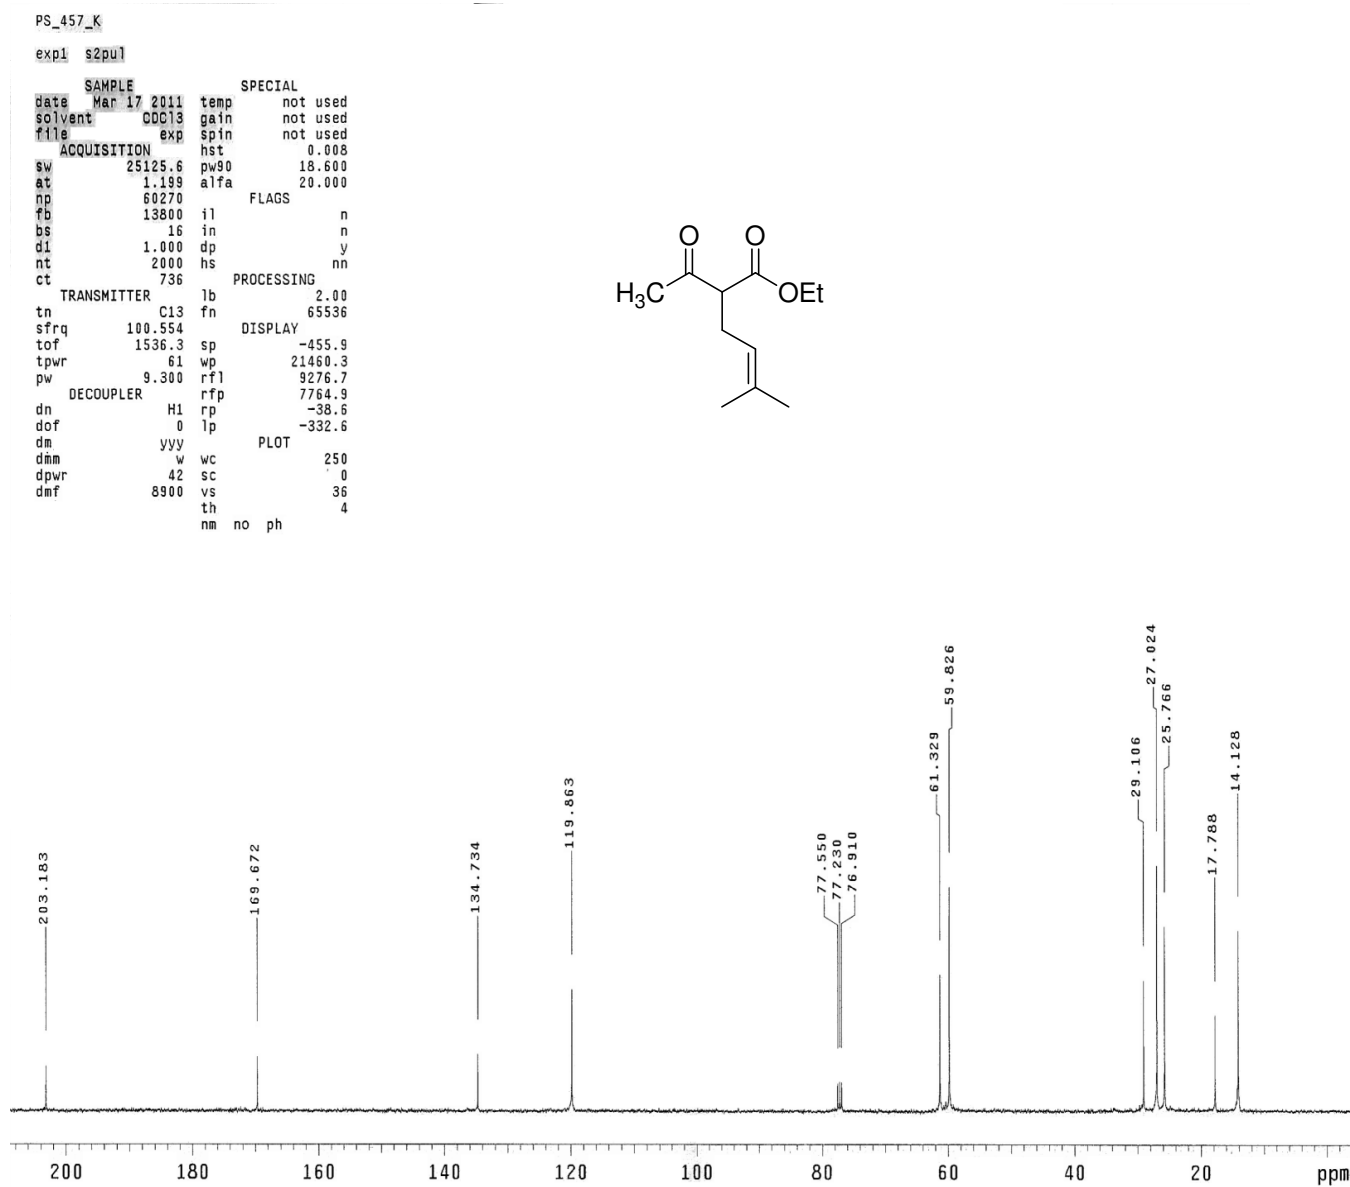

## <sup>1</sup>H NMR spectra of B-2

PS\_449\_K

exp1 s2pu1

| SAMPLE      |            | SPECIAL    |          |
|-------------|------------|------------|----------|
| date        | Oct 6 2011 | temp       | not used |
| solvent     | CDCl3      | gain       | not used |
| file        | exp        | spin       | not used |
| ACQUISITION |            |            |          |
| sw          | 6389.8     | pw90       | 19.700   |
| at          | 1.998      | alfa       | 20.000   |
| np          | 25528      | FLAGS      |          |
| fb          | not used   | il         | n        |
| bs          | 8          | in         | n        |
| dl          | 1.000      | dp         | y        |
| nt          | 200        | hs         | nn       |
| ct          | 200        | PROCESSING |          |
| tn          |            | lb         | 0.10     |
| sfrq        | 399.853    | H1         | fn       |
| tof         | 362.8      | DISPLAY    |          |
| tpwr        | 57         | sp         | -222.3   |
| pw          | 9.850      | wp         | 3644.1   |
|             |            | rfl        | 793.1    |
| DECOUPLER   |            | rfp        | 0        |
| dn          | C13        | rp         | 109.6    |
| dof         | 0          | lp         | -85.9    |
| dm          | nnn        | PLOT       |          |
| dmm         | c          | wc         | 250      |
| dpwr        | 50         | sc         | 0        |
| dmf         | 15900      | vs         | 24       |
|             |            | th         | 6        |
|             |            | nm         | cdc ph   |

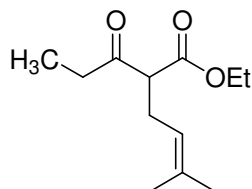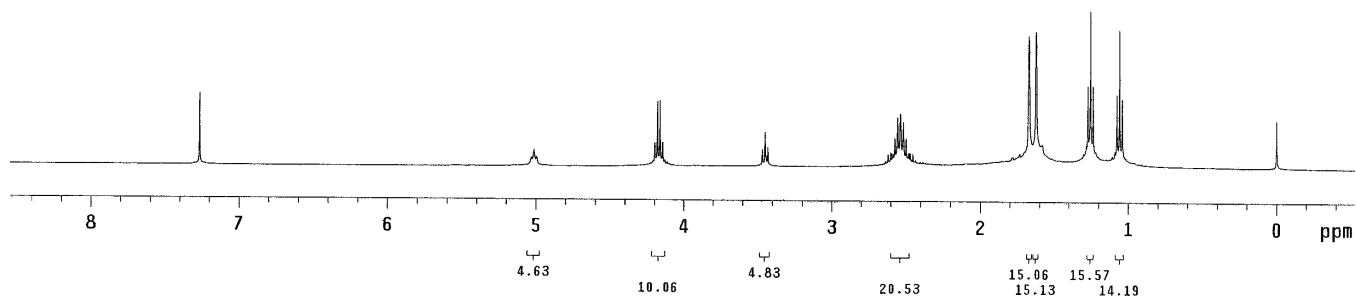

### <sup>13</sup>C NMR spectra of B-2

PS\_449\_Ketone

expl s2pu1

| SAMPLE      |             | SPECIAL    |          |
|-------------|-------------|------------|----------|
| date        | Mar 19 2011 | temp       | not used |
| solvent     | CDCl3       | gain       | not used |
| file        |             | spin       | not used |
| ACQUISITION |             | SPECIAL    |          |
| sw          | 25125.6     | hst        | 0.008    |
| at          | 1.199       | pw90       | 18.600   |
| np          | 60270       | alfa       | 20.000   |
| fb          | 13800       | FLAGS      |          |
| bs          | 16          | il         | n        |
| d1          | 1.000       | in         | n        |
| nt          | 4000        | dp         | y        |
| ct          | 1280        | hs         | nn       |
| TRANSMITTER |             | PROCESSING |          |
| tn          | C13         | lb         | 2.00     |
| sfrq        | 100.554     | fn         | 65536    |
| DECOUPLER   |             | DISPLAY    |          |
| tof         | 1536.3      | sp         | -483.5   |
| tpwr        | 61          | wp         | 22219.5  |
| pw          | 9.300       | rfl        | 9271.3   |
| dn          | H1          | rfp        | 7764.9   |
| dof         | 0           | lp         | -43.9    |
| dm          | yyy         | lp         | -364.0   |
| PLOT        |             | wc         | 250      |
| dmm         | w           | sc         | 0        |
| dpwr        | 42          | vs         | 31       |
| dmf         | 8900        | th         | 4        |
|             |             | nm         | no ph    |

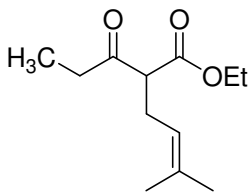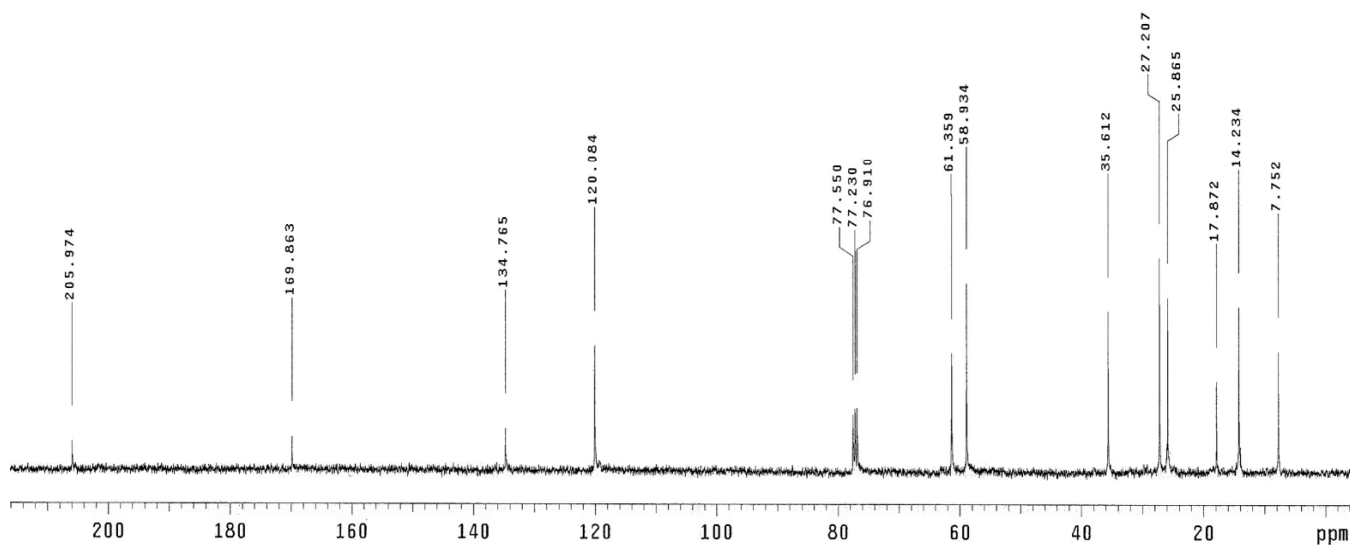

### <sup>1</sup>H NMR spectra of B-3

PS\_447M\_Ketone

exp1 s2pu1

| SAMPLE      |             | SPECIAL    |          |
|-------------|-------------|------------|----------|
| date        | Mar 16 2011 | temp       | not used |
| solvent     | CDC13       | gain       | not used |
| file        |             | spin       | not used |
| ACQUISITION | exp         | hst        | 0.008    |
| sw          | 6389.8      | pw90       | 19.700   |
| at          | 1.998       | alfa       | 20.000   |
| np          | 25528       | FLAGS      |          |
| fb          | not used    | il         | n        |
| bs          | 4           | in         | n        |
| d1          | 1.000       | dp         | y        |
| nt          | 32          | hs         | nn       |
| ct          | 32          | PROCESSING |          |
| TRANSMITTER | H1          | lb         | 0.10     |
| tn          |             | fn         | 65536    |
| sfrq        | 399.853     | DISPLAY    |          |
| tof         | 362.8       | sp         | -186.8   |
| tpwr        | 57          | wp         | 3585.2   |
| pw          | 9.850       | rfl        | 791.3    |
| DECOUPLER   |             | rffp       | 0        |
| dn          | C13         | rp         | 110.1    |
| dof         | 0           | lp         | -86.2    |
| dm          | nnn         | PLOT       |          |
| dmm         | c           | wc         | 250      |
| dpwr        | 50          | sc         | 0        |
| dmf         | 15900       | vs         | 44       |
|             |             | th         | 5        |
|             |             | nm         | cdc ph   |

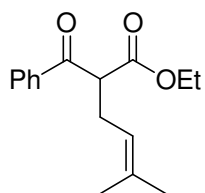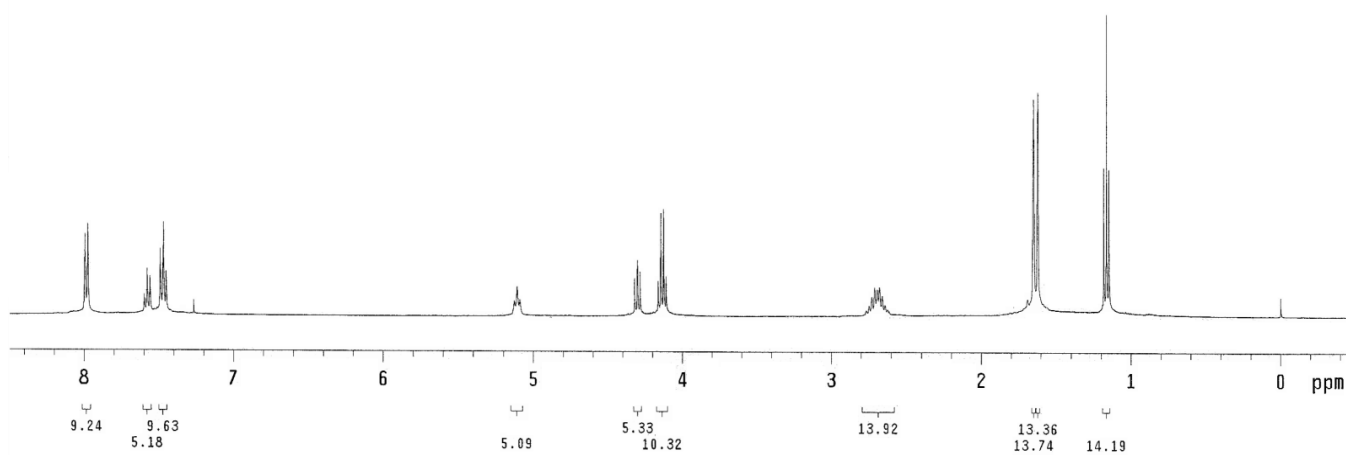

S-12



### <sup>13</sup>C NMR spectra of B-3

PS\_447M\_Ketone

expt s2pu1

| SAMPLE      |             | SPECIAL    |          |
|-------------|-------------|------------|----------|
| date        | Mar 16 2011 | temp       | not used |
| solvent     | CDCl3       | gain       | not used |
| file        |             | spin       | not used |
| ACQUISITION |             |            |          |
| sw          | 25125.6     | pw90       | 18.600   |
| at          | 1.199       | alfa       | 20.000   |
| np          | 60270       | FLAGS      |          |
| fb          | 13800       | il         | n        |
| bs          | 16          | in         | n        |
| dl          | 1.000       | dp         | y        |
| nt          | 3000        | hs         | nn       |
| ct          | 416         | PROCESSING |          |
| tn          | C13         | lb         | 2.00     |
| sfrq        | 100.554     | fn         | 65536    |
| tof         | 1536.3      | DISPLAY    |          |
| tpwr        | i1          | wp         | -425.3   |
| pw          | 9.300       | rfl        | 21096.9  |
| DECOUPLER   |             |            |          |
| dn          | H1          | rfp        | 9279.0   |
| dof         | 0           | rp         | 7764.9   |
| dm          | yyy         | lp         | -45.7    |
| dmm         | w           | PLOT       |          |
| dpwr        | 42          | sc         | 250      |
| dmf         | 8900        | vs         | 0        |
|             |             | th         | 38       |
|             |             | nm         | 3        |
|             |             | no         | ph       |

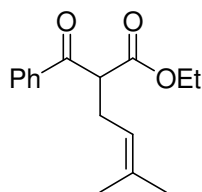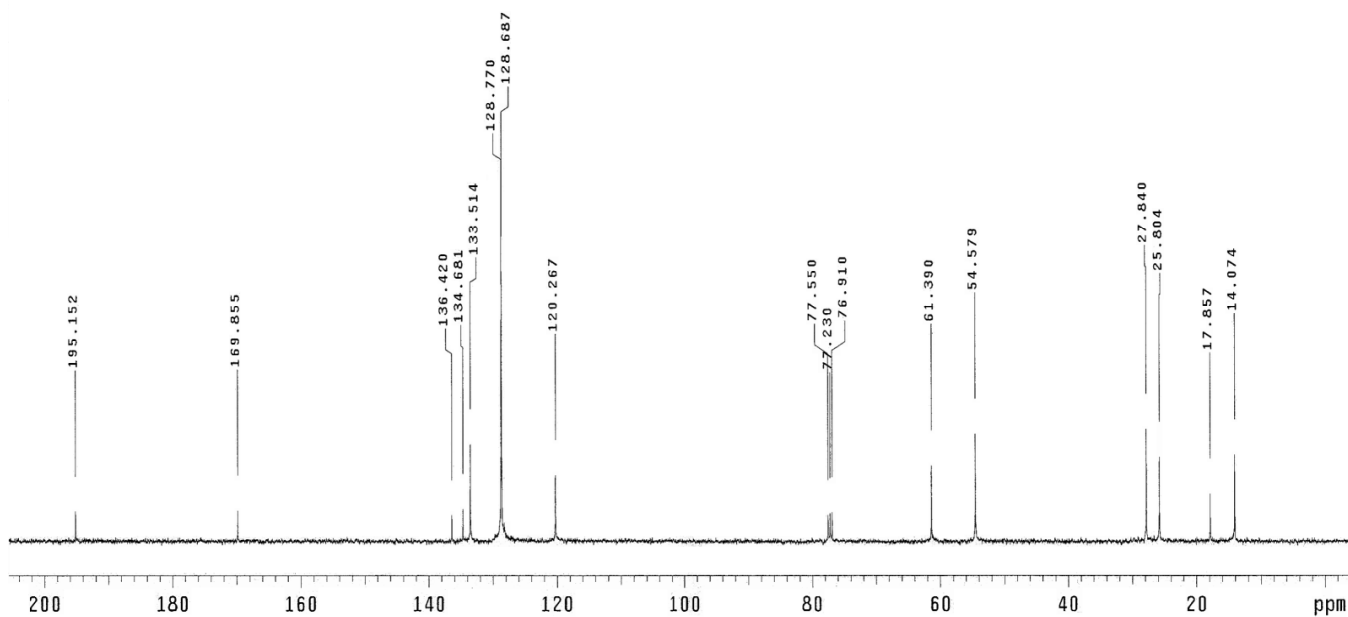

### <sup>1</sup>H NMR spectra of 1a

PS\_457\_L

expl std1h

| SAMPLE      |             | SPECIAL    |          |
|-------------|-------------|------------|----------|
| date        | Sep 26 2011 | temp       | not used |
| solvent     | CDCl3       | gain       | not used |
| file        |             | exp        | spin     |
| ACQUISITION |             | hst        | 0.008    |
| sw          | 6006.0      | pw90       | 19.700   |
| at          | 1.995       | alfa       | 20.000   |
| np          | 23964       | FLAGS      |          |
| fb          | not used    | il         | n        |
| bs          | 8           | in         | n        |
| dl          | 1.000       | dp         | y        |
| nt          | 200         | hs         | nn       |
| ct          | 200         | PROCESSING |          |
| TRANSMITTER |             | fn         | not used |
| tn          | H1          | DISPLAY    |          |
| sfrq        | 399.853     | sp         | -189.2   |
| tof         | 0           | wp         | 3590.8   |
| tpwr        | 57          | rfl        | 962.3    |
| pw          | 7.000       | rfp        | 0        |
| DECOUPLER   |             | rp         | 109.0    |
| dn          | C13         | lp         | -71.1    |
| dof         | 0           | PLOT       |          |
| dm          | nnn         | wc         | 250      |
| dmm         | c           | sc         | 0        |
| dpwr        | 50          | vs         | 41       |
| daf         | 15900       | th         | 7        |
|             |             | nm         | cdc ph   |

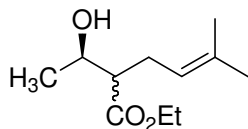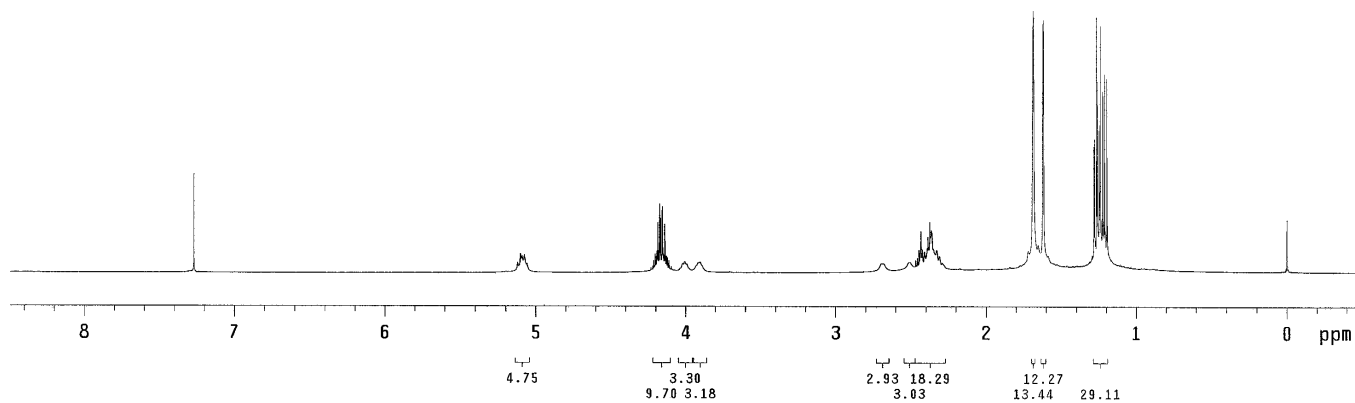

### <sup>13</sup>C NMR spectra of 1a

PS\_457A1c\_L

exp1 s2pu1

| SAMPLE      |             | SPECIAL    |          |
|-------------|-------------|------------|----------|
| date        | Mar 18 2011 | temp       | not used |
| solvent     | CDCl3       | gain       | not used |
| file        | exp         | spin       | not used |
| ACQUISITION |             | hst        | 0.008    |
| sw          | 25125.6     | ps0        | 18.600   |
| at          | 1.199       | alfa       | 20.000   |
| np          | 60270       | FLAGS      |          |
| fb          | 13800       | fl         | n        |
| bs          | 16          | in         | n        |
| d1          | 1.000       | ds         | y        |
| nt          | 2000        | hs         | nn       |
| ct          | 848         | PROCESSING |          |
| tn          | TRANSMITTER | lb         | 2.00     |
| sfrq        | C13         | fn         | 65536    |
| tof         | 1536.3      | sp         | -531.1   |
| tpwr        | 61          | wp         | 21559.3  |
| pw          | 9.300       | rfl        | 9285.9   |
| DECOUPLER   |             | rfp        | 7764.9   |
| dn          | H1          | rp         | -42.2    |
| dof         | 0           | lp         | -315.5   |
| dm          | yyy         | PLOT       |          |
| dmm         | w           | wc         | 250      |
| dpwr        | 42          | sc         | 0        |
| dmf         | 8900        | vs         | 33       |
|             | th          |            | 1        |
|             | nm          | no         | ph       |

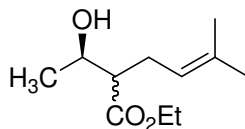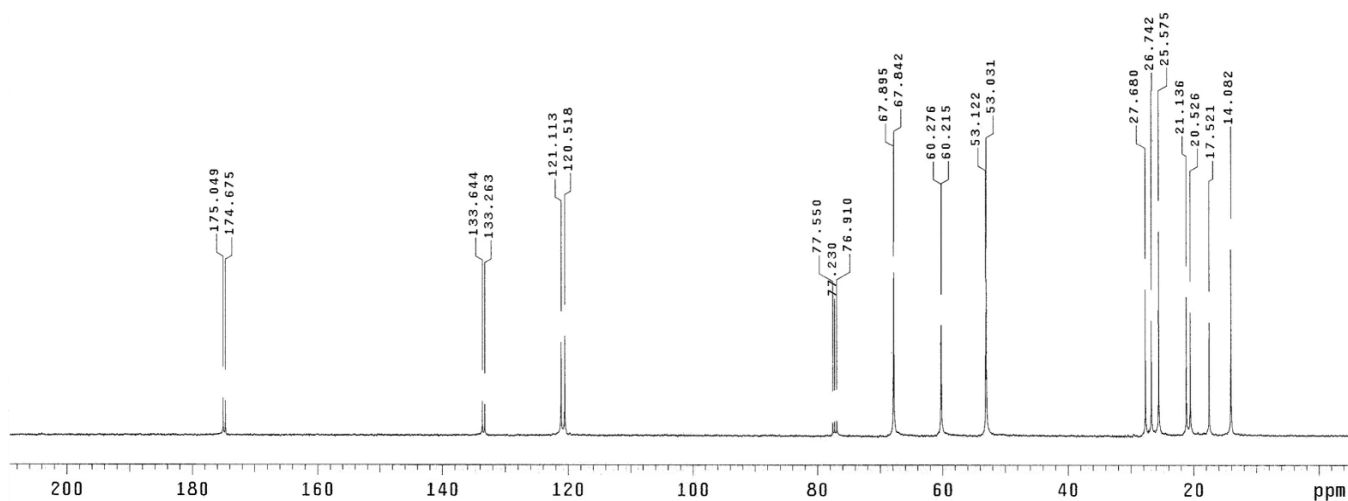

### $^1\text{H}$ NMR spectra of 1b

```
PS_449A1c_L
exp1 s2pu1
SAMPLE          SPECIAL
date Feb 28 2011 temp not used
solvent CDCl3 gain not used
file /export/home/~ spin not used
ciftemp/AKS_PS_449~ hst 0.008
Alc_L.fid pw90 19.700
ACQUISITION alfa 20.000
sw 6389.8 FLAGS
at 1.998 il n
np 25528 in n
fb not used dp y
bs 8 hs nn
d1 1.000 PROCESSING
nt 100 lb 0.10
ct 100 fn 65536
TRANSMITTER H1 sp DISPLAY
tn H1 sp -215.5
sfrq 399.853 wp 3610.3
tof 362.8 rfl 786.3
tpwr 57 rfp 0
pw 9.850 rp 107.1
DECOUPLER C13 lp -74.2
dn C13 PLOT
dof 0 wc 250
dm nnn sc 0
dmm c vs 57
dpwr 50 th 20
dmf 15900 nm cdc ph
```

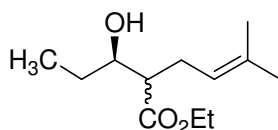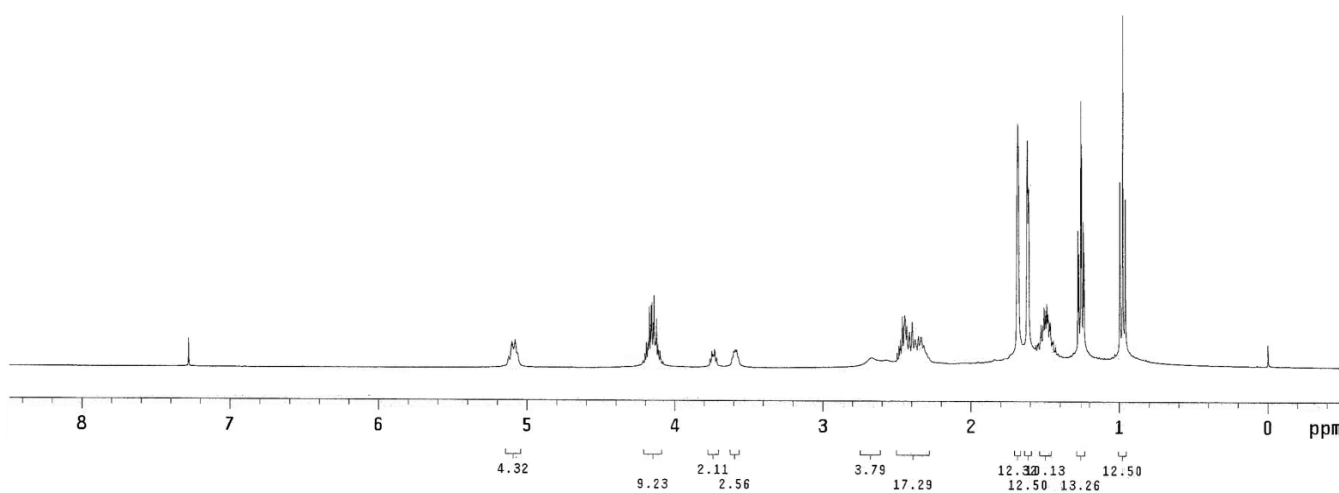

### <sup>13</sup>C NMR spectra of 1b

PS\_449\_L

exp1 s2pu1

| SAMPLE             |                | SPECIAL    |          |
|--------------------|----------------|------------|----------|
| date               | Feb 25 2011    | temp       | not used |
| solvent            | CDCl3          | gain       | not used |
| file               | /export/home/~ | spin       | not used |
| ciftemp/AKS_PS_449 | hst            |            | 0.008    |
| L_C13.fid          | pw90           |            | 18.600   |
| ACQUISITION        | alfa           |            | 20.000   |
| sw                 | 25125.6        | FLAGS      |          |
| at                 | 1.199          | il         | n        |
| np                 | 60270          | in         | n        |
| fb                 | 13800          | dp         | v        |
| bs                 | 16             | hs         | nn       |
| dl                 | 1.000          | PROCESSING |          |
| nt                 | 4000           | lb         | 2.00     |
| ct                 | 3232           | fn         | 65536    |
| TRANSMITTER        |                | DISPLAY    |          |
| tn                 | C13            | sp         | -422.2   |
| sfrq               | 100.554        | wp         | 21030.9  |
| tof                | 1536.3         | rfl        | 9275.9   |
| tpwr               | 61             | rfp        | 7764.9   |
| pw                 | 9.300          | rp         | -62.6    |
| DECOUPLER          |                | lp         | -285.1   |
| dn                 | H1             | PLOT       |          |
| dof                | 0              | wc         | 250      |
| dm                 | yyy            | sc         | 0        |
| dmm                | w              | vs         | 25       |
| dpwr               | 42             | th         | 3        |
| dmf                | 8900           | nm         | no       |
|                    |                | ph         |          |

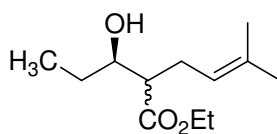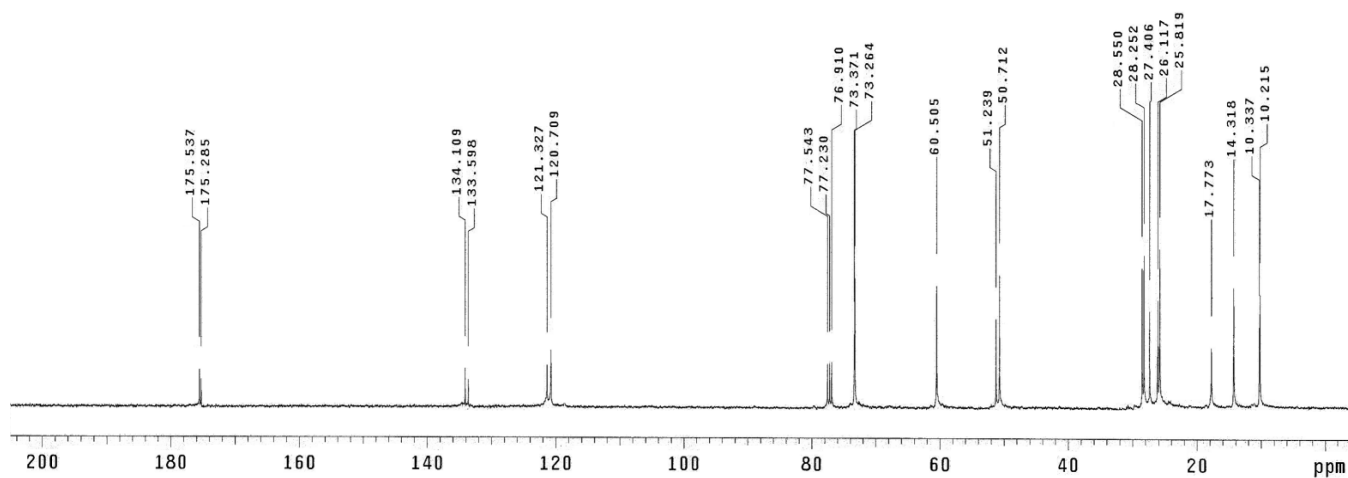

### <sup>1</sup>H NMR spectra of 1c

PS\_447\_L

expl s2pu1

| SAMPLE      |                | SPECIAL    |          |
|-------------|----------------|------------|----------|
| date        | Feb 19 2011    | temp       | not used |
| solvent     | CDCl3          | gain       | not used |
| file        | /export/home/~ | spin       | not used |
| ciftemp     | AKS_PS_447~    | hst        | 0.008    |
|             | _L.fid         | pw90       | 19.700   |
|             |                | alfa       | 20.000   |
| ACQUISITION |                | FLAGS      |          |
| sw          | 6389.8         |            |          |
| at          | 1.998          | il         | n        |
| np          | 25528          | in         | n        |
| fb          | not used       | dp         | y        |
| bs          | 4              | hs         | nn       |
| d1          | 1.000          | PROCESSING |          |
| nt          | 32             | lb         | 0.10     |
| ct          | 32             | fn         | 65536    |
| TRANSMITTER |                | DISPLAY    |          |
| tn          | H1             | sp         | -180.6   |
| sfrq        | 399.853        | wp         | 3660.9   |
| tof         | 362.8          | rfl        | 793.5    |
| tpwr        | 57             | rffp       | 0        |
| pw          | 9.850          | rp         | 114.9    |
|             |                | lp         | -93.0    |
| DECOUPLER   |                | PLOT       |          |
| dn          | C13            |            |          |
| dof         | 0              | wc         | 250      |
| dm          | nnn            | sc         | 0        |
| dmm         | c              | vs         | 68       |
| dpwr        | 50             | th         | 20       |
| dmf         | 15900          | nm         | cdc ph   |

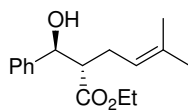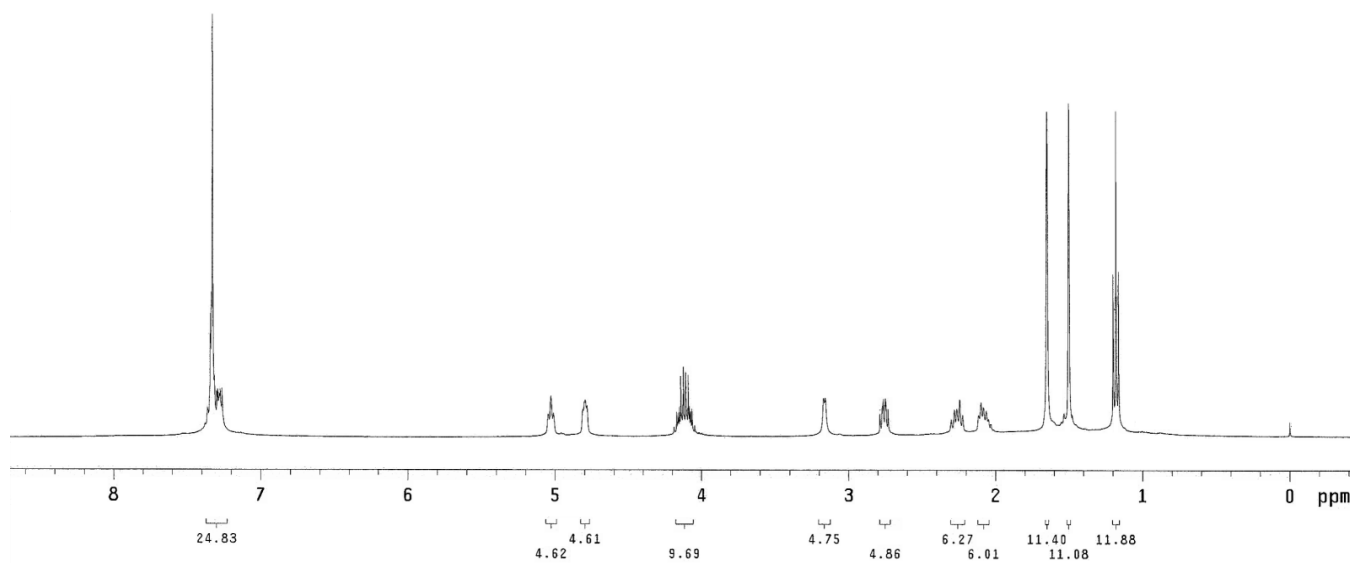

### <sup>13</sup>C NMR spectra of 1c

```
PS_447_L
exp1 s2pu1
SAMPLE
date Feb 19 2011 temp not used
solvent CDC13 gain not used
file /export/home/~ spin not used
ciftemp/AKS_PS_447~ hst 0.008
L_C13.fid pw90 18.600
ACQUISITION alfa 20.000
sw 25125.6
at 1.199 f1 FLAGS n
np 68270 in n
fb 13800 dp y
bs 16 hs nn
d1 1.000 PROCESSING
nt 2000 lb 2.00
ct 0 fn 65536
TRANSMITTER C13 DISPLAY -521.9
tn 100.554 wp 21328.5
sfrq 1536.3 rfl 9276.7
tpwr 61 rfp 7764.9
pw 9.300 rp -63.7
DECOUPLER lp -312.0
dn H1 PLOT
dof 0 wc 250
dm yvy sc 0
dmm w vs 26
dpwr 42 th
dmf 8900 nm no ph 2
```

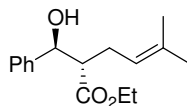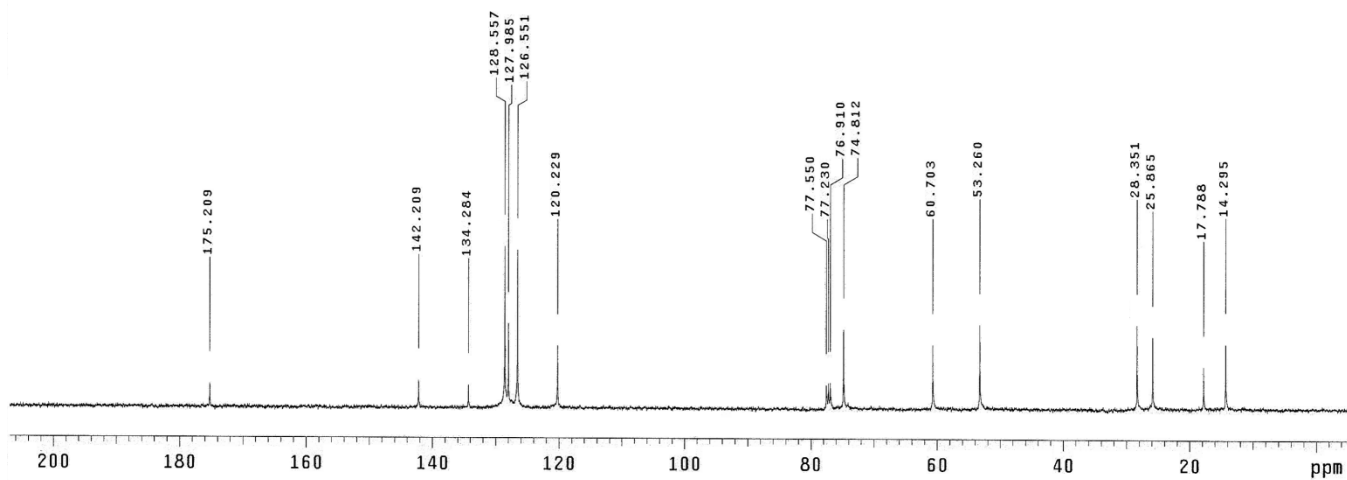

### <sup>1</sup>H NMR spectra of 1d

PS\_447\_M

exp1 s2pu1

| SAMPLE              |                | SPECIAL    |          |
|---------------------|----------------|------------|----------|
| date                | Feb 18 2011    | temp       | not used |
| solvent             | CDCl3          | gain       | not used |
| file                | /export/home/~ | spin       | not used |
| ciftemp/AKS_PS_447~ |                | hst        | 0.008    |
|                     | Mi.fid         | pw90       | 19.700   |
|                     | alfa           |            | 20.000   |
| ACQUISITION         |                | FLAGS      |          |
| sw                  | 6309.8         |            |          |
| at                  | 1.998          | il         | n        |
| np                  | 25528          | in         | n        |
| fb                  | not used       | dp         | y        |
| bs                  | 4              | hs         | nn       |
| d1                  | 1.000          | PROCESSING |          |
| nt                  | 32             | lb         | 0.10     |
| ct                  | 32             | fn         | 65536    |
| TRANSMITTER         |                | DISPLAY    |          |
| tn                  | H1             | sp         | -183.3   |
| sfrq                | 399.853        | wp         | 3610.3   |
| tof                 | 362.8          | rfl        | 796.2    |
| tpwr                | 57             | rfp        | 0        |
| pw                  | 9.850          | rp         | 110.6    |
|                     | DECOUPLER      | lp         | -84.9    |
| DECOUPLER           |                | PLOT       |          |
| dn                  | C13            |            |          |
| dof                 | 0              | wc         | 250      |
| dm                  | nnn            | sc         | 0        |
| dmm                 | c              | vs         | 39       |
| dpwr                | 50             | th         | 20       |
| dmf                 | 15900          | nm         | cdc ph   |

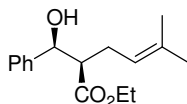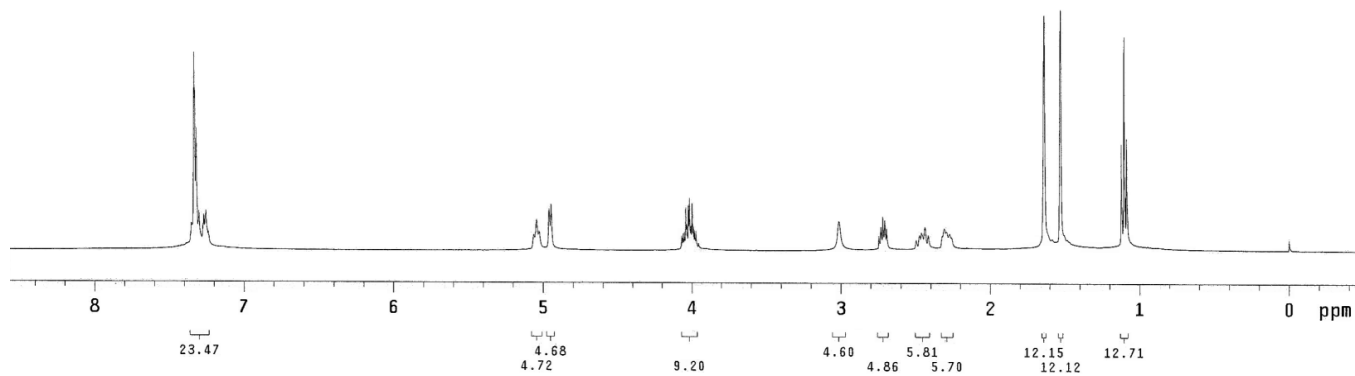



### <sup>13</sup>C NMR spectra of 1d

PS\_447\_M

exp1 s2pu1

| SAMPLE      |                | SPECIAL    |          |
|-------------|----------------|------------|----------|
| date        | Feb 18 2011    | temp       | not used |
| solvent     | CDC13          | gain       | not used |
| file        | /export/home/~ | spin       | not used |
| ciftemp     | AKS_PS_447~    | hst        | 0.008    |
|             | M_C13.fid      | pw90       | 18.600   |
|             |                | alfa       | 20.000   |
| ACQUISITION |                | FLAGS      |          |
| sw          | 25125.6        |            |          |
| at          | 1.199          | il         | n        |
| np          | 60270          | in         | n        |
| fb          | 13800          | dp         | y        |
| bs          | 16             | hs         | nn       |
| dl          | 1.000          | PROCESSING |          |
| nt          | 8000           | lb         | 2.00     |
| ct          | 1504           | fn         | 65536    |
| TRANSMITTER |                | DISPLAY    |          |
| tn          | C13            | sp         | -551.8   |
| sfrq        | 100.624        | wp         | 21229.5  |
| tof         | 1536.3         | rfl        | 9272.9   |
| tpwr        | 61             | rfp        | 7764.9   |
| pw          | 9.300          | rp         | -26.3    |
|             | DECOUPLER      | rp         | -358.9   |
| dn          | H1             | PLOT       |          |
| dof         | 0              | wc         | 250      |
| dm          | yyy            | sc         | 0        |
| dmm         | w              | vs         | 23       |
| dpwr        | 42             | th         | 2        |
| dmf         | 8900           | nm         | no ph    |

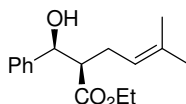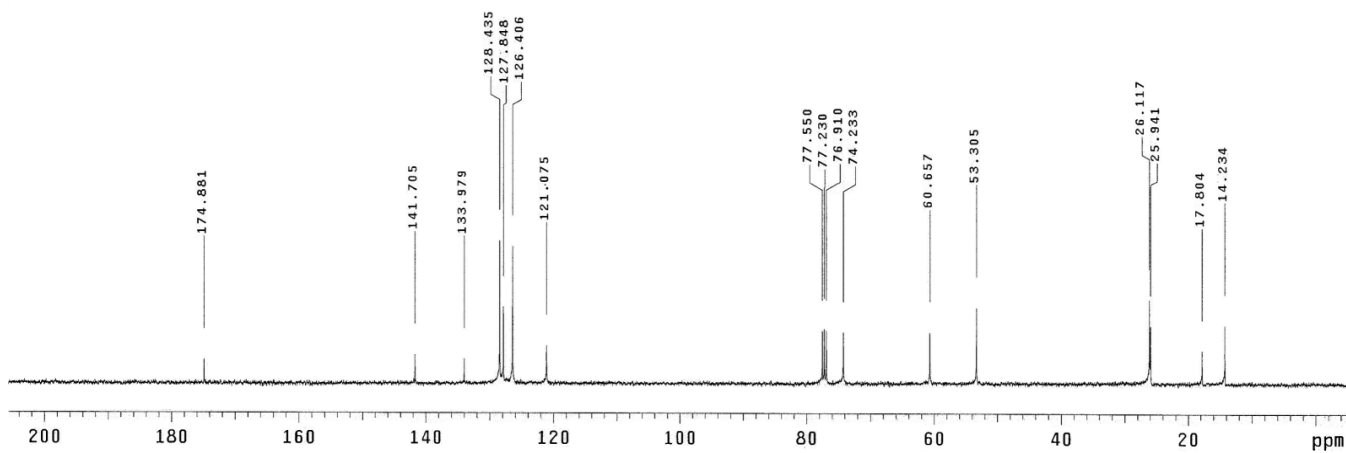

### <sup>1</sup>H NMR spectra of 3a

PS\_392\_U

exp1 s2pu1

| SAMPLE              |                | SPECIAL    |                   |
|---------------------|----------------|------------|-------------------|
| date                | Nov 26 2010    | temp       | not used          |
| solvent             | CDCl3          | gain       | not used          |
| file                | /export/home/~ | spin       | not used          |
| ciftemp/AKS_PS_392~ |                | hst        | 0.008             |
|                     | U.fid          | pw90       | 19.700            |
|                     | alfa           | alfa       | 20.000            |
| ACQUISITION         |                | FLAGS      |                   |
| sw                  | 6389.8         | il         | n                 |
| at                  | 1.998          | in         | n                 |
| np                  | 25528          | dp         | y                 |
| fb                  | not used       | hs         | nn                |
| bs                  | 4              | PROCESSING |                   |
| d1                  | 1.000          | lb         | 0.10              |
| nt                  | 32             | fn         | 65536             |
| ct                  | 32             | DISPLAY    |                   |
| TRANSMITTER         |                | tn         | H1 sp -208.5      |
| tn                  | H1             | sfrq       | 399.853 wp 3602.0 |
| sfrq                | 399.853        | tof        | 362.8 rfl 796.2   |
| tof                 | 362.8          | tpwr       | 57 rfp 0          |
| tpwr                | 57             | pw         | 9.850 rp 106.1    |
| pw                  | 9.850          | DECOUPLER  | lp -85.7          |
| DECOUPLER           |                | PLOT       |                   |
| dn                  | C13            | dof        | 0 wc 250          |
| dof                 | 0              | dm         | nnn sc 0          |
| dm                  | nnn            | dmm        | c vs 48           |
| dmm                 | c              | dpwr       | 50 th 39          |
| dpwr                | 50             | dmf        | 15900 nm cdc ph   |
| dmf                 | 15900          |            |                   |

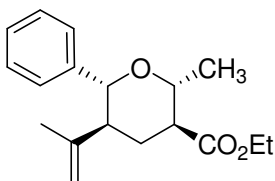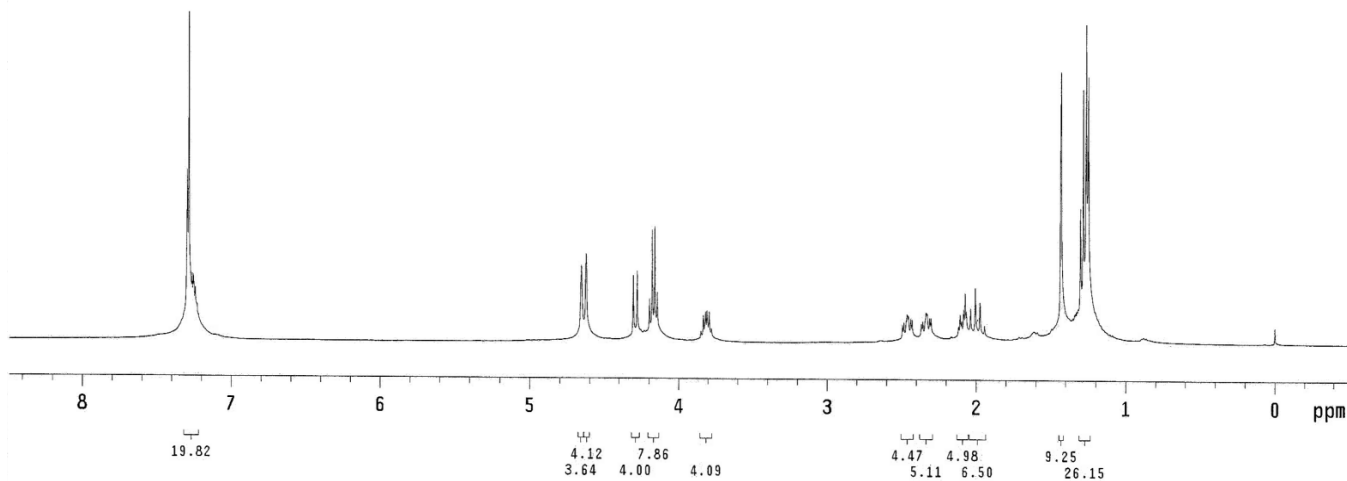

### <sup>13</sup>C NMR spectra of 3a

PS\_392\_U

exp1 s2pu1

| SAMPLE      |                | SPECIAL    |          |
|-------------|----------------|------------|----------|
| date        | Nov 26 2010    | temp       | not used |
| solvent     | CDCl3          | gain       | not used |
| file        | /export/home/~ | spin       | not used |
| ciftemp     | AKS_PS_392~    | hst        | 0.008    |
| U_C13.fid   |                | pw90       | 18.600   |
| ACQUISITION | alfa           |            | 20.000   |
| sw          | 25125.6        | FLAGS      |          |
| at          | 1.199          | il         | n        |
| np          | 60270          | in         | n        |
| fb          | 13800          | dp         | y        |
| bs          | 16             | hs         | nn       |
| d1          | 1.000          | PROCESSING |          |
| nt          | 3000           | lb         | 2.00     |
| ct          | 528            | fn         | 65536    |
| TRANSMITTER |                | DISPLAY    |          |
| tn          | C13            | sp         | -620.8   |
| sfrq        | 100.554        | wp         | 21262.5  |
| tof         | 1536.3         | rfl        | 9276.7   |
| tpwr        | 61             | rff        | 7764.9   |
| pw          | 9.300          | rp         | -52.1    |
| DECOUPLER   |                | lp         | -305.8   |
| dn          | H1             | PLOT       |          |
| dof         | 0              | wc         | 250      |
| dm          | yyy            | sc         | 0        |
| dmm         | w              | vs         | 36       |
| dpwr        | 42             | th         | 3        |
| dmf         | 8900           | nm         | no ph    |

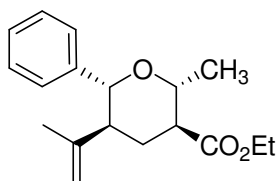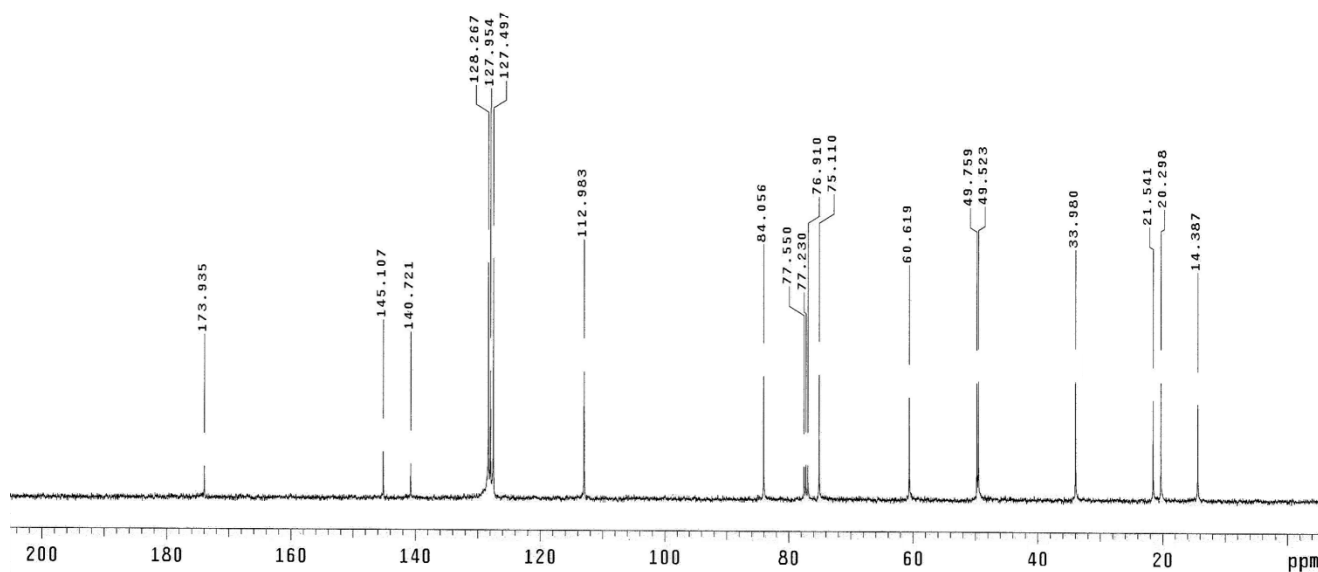

### <sup>1</sup>H NMR spectra of 3b

PS\_343

exp1 s2pu1

| SAMPLE              |                | SPECIAL    |          |
|---------------------|----------------|------------|----------|
| date                | Sep 2 2010     | temp       | not used |
| solvent             | CDC13          | gain       | not used |
| file                | /export/home/~ | spin       | not used |
| guest123/AKS_PS_34~ |                | hst        | 0.008    |
| 3_U.fid             |                | pw90       | 19.700   |
| ACQUISITION         |                | alfa       | 20.000   |
| sw                  | 6389.8         | FLAGS      |          |
| at                  | 1.998          | il         | n        |
| np                  | 25528          | in         | n        |
| fb                  | not used       | dp         | y        |
| bs                  | 4              | hs         | nn       |
| d1                  | 1.000          | PROCESSING |          |
| nt                  | 32             | lb         | 0.10     |
| ct                  | 32             | fn         | 65536    |
| TRANSMITTER         |                | DISPLAY    |          |
| tn                  | H1             | sp         | -157.4   |
| sfrq                | 399.853        | wp         | 3207.5   |
| tof                 | 362.8          | rfl        | 795.4    |
| tpwr                | 57             | rfp        | 0        |
| pw                  | 9.850          | rp         | 118.1    |
| DECOUPLER           |                | lp         | -67.4    |
| dn                  | C13            | PLOT       |          |
| dof                 | 0              | wc         | 250      |
| dm                  | nnn            | sc         | 0        |
| dmm                 | c              | vs         | 43       |
| dpwr                | 50             | th         | 39       |
| dmf                 | 15900          | nm         | cdc ph   |

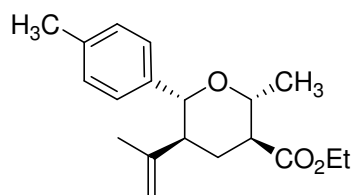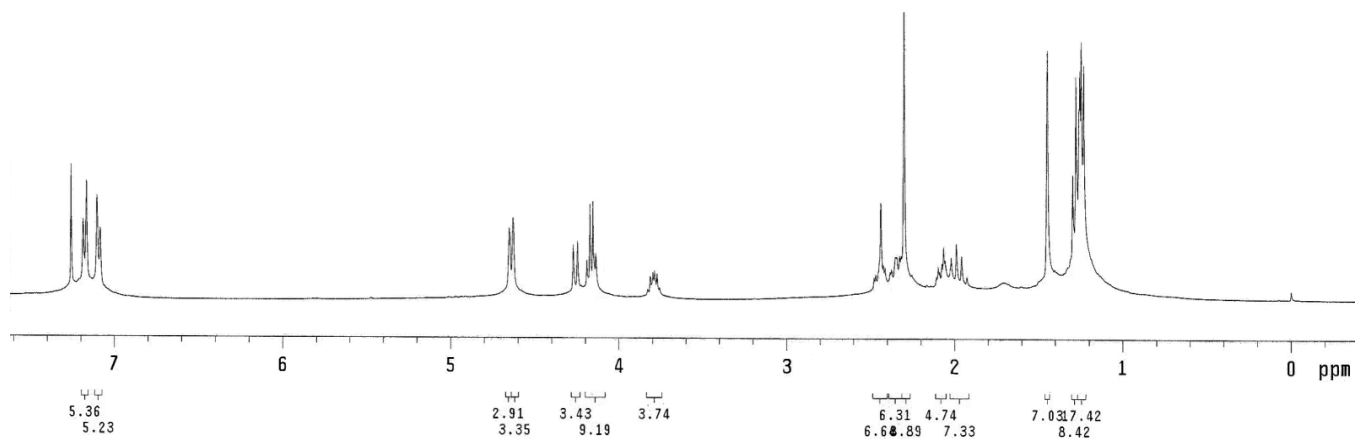

### <sup>13</sup>C NMR spectra of 3b

PS\_343\_U

exp1 s2pu1

| SAMPLE             |                | SPECIAL    |          |
|--------------------|----------------|------------|----------|
| date               | Sep 3 2010     | temp       | not used |
| solvent            | CDCl3          | gain       | not used |
| file               | /export/home/~ | spin       | not used |
| guest123/AKS_PS_34 |                | hst        | 0.008    |
| 3U_C13.fid         |                | pw90       | 18.600   |
| ACQUISITION        |                | alfa       | 20.000   |
| sw                 | 25125.6        | FLAGS      |          |
| at                 | 1.199          | il         | n        |
| np                 | 60270          | in         | n        |
| fb                 | 13800          | dp         | y        |
| bs                 | 16             | hs         | nn       |
| d1                 | 1.000          | PROCESSING |          |
| nt                 | 4000           | lb         | 2.00     |
| ct                 | 1632           | fn         | 65536    |
| TRANSMITTER        |                | DISPLAY    |          |
| tn                 | C13            | sp         | -518.0   |
| sfrq               | 100.554        | wp         | 21394.4  |
| tof                | 1536.3         | rfl        | 9272.9   |
| tpwr               | 61             | rfp        | 7764.9   |
| pw                 | 9.300          | rp         | -52.1    |
| DECOUPLER          |                | lp         | -305.8   |
| dn                 | H1             | PLOT       |          |
| dof                | 0              | wc         | 250      |
| dm                 | yyy            | sc         | 0        |
| dmm                | w              | vs         | 31       |
| dpwr               | 42             | th         | 4        |
| dmt                | 8900           | nm         | no ph    |

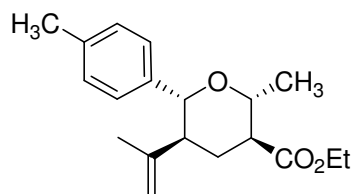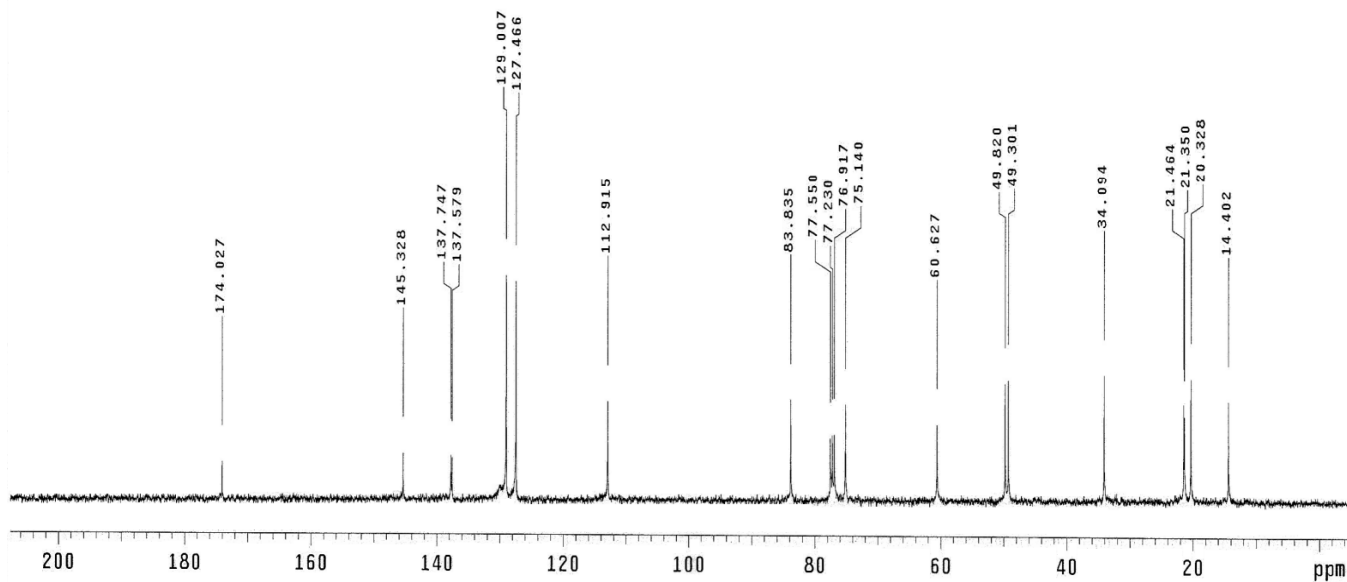

### <sup>1</sup>H NMR spectra of 3c

PS\_341\_U

exp1 s2pu1

| SAMPLE              |                | SPECIAL    |          |
|---------------------|----------------|------------|----------|
| date                | Sep 1 2010     | temp       | not used |
| solvent             | CDCl3          | gain       | not used |
| file                | /export/home/~ | spin       | not used |
| guest123/AKS_PS_34~ |                | hst        | 0.008    |
| 1_U.fid             |                | pw90       | 19.700   |
|                     |                | alfa       | 20.000   |
| ACQUISITION         |                | FLAGS      |          |
| sw                  | 6389.8         |            |          |
| at                  | 1.998          | il         | n        |
| np                  | 25528          | in         | n        |
| fb                  | not used       | dp         | y        |
| bs                  | 4              | hs         | nn       |
| d1                  | 1.000          | PROCESSING |          |
| nt                  | 32             | lb         | 0.10     |
| ct                  | 32             | fn         | 65536    |
| TRANSMITTER         |                | DISPLAY    |          |
| tn                  | H1             | sp         | -214.5   |
| sfrq                | 399.853        | wp         | 3610.3   |
| tof                 | 362.8          | rfl        | 793.7    |
| tpwr                | 57             | rfp        | 0        |
| pw                  | 9.850          | rp         | 120.1    |
|                     |                | lp         | -69.1    |
| DECOUPLER           |                | PLOT       |          |
| dn                  | C13            |            |          |
| dof                 | 0              | wc         | 250      |
| dm                  | nnn            | sc         | 0        |
| dmm                 | c              | vs         | 48       |
| dpwr                | 50             | th         | 30       |
| dmf                 | 15900          | nm         | cdc ph   |

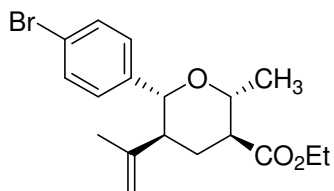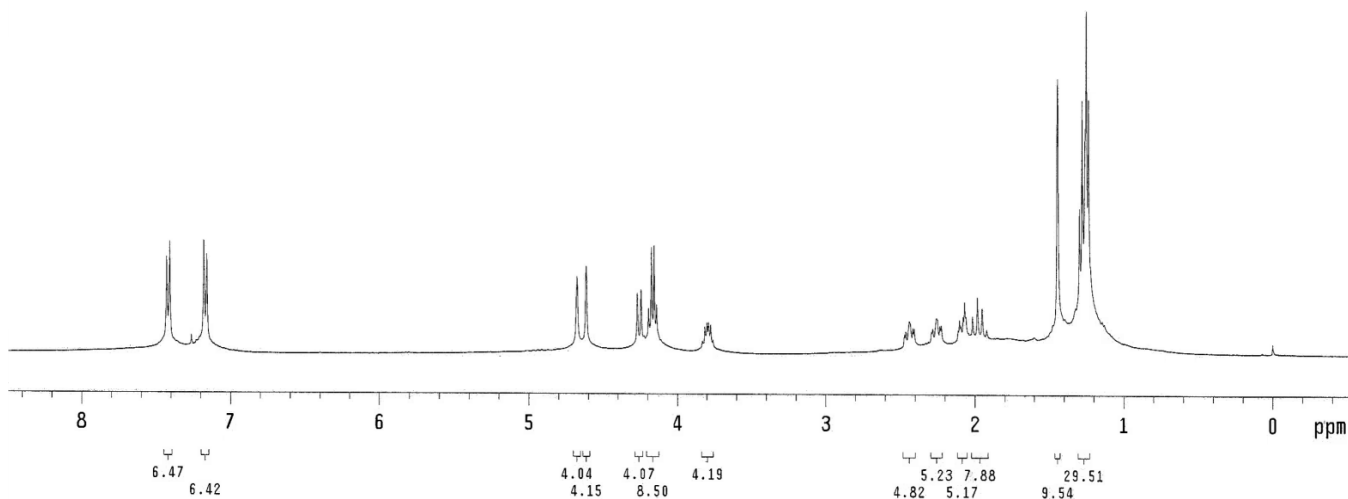

### $^{13}\text{C}$ NMR spectra of 3c

PS\_341\_U

exp1 s2pu1

| SAMPLE              |                | SPECIAL    |          |
|---------------------|----------------|------------|----------|
| date                | Sep 1 2010     | temp       | not used |
| solvent             | CDCl3          | gain       | not used |
| file                | /export/home/~ | spin       | not used |
| guest123/AKS_PS_34~ |                | hst        | 0.008    |
| 1M_C13.fid          |                | pw90       | 18.600   |
| ACQUISITION         | alfa           |            | 20.000   |
| sw                  | 25125.6        | FLAGS      |          |
| at                  | 1.199          | il         | n        |
| np                  | 60270          | in         | n        |
| fb                  | 13800          | dp         | y        |
| bs                  | 16             | hs         | nn       |
| d1                  | 1.000          | PROCESSING |          |
| nt                  | 4000           | lb         | 2.00     |
| ct                  | 3024           | fn         | 65536    |
| TRANSMITTER         |                | DISPLAY    |          |
| tn                  | C13            | sp         | -514.2   |
| sfrq                | 100.554        | wp         | 21163.6  |
| tof                 | 1536.3         | rf1        | 9269.0   |
| tpwr                | 61             | rfp        | 7764.9   |
| pw                  | 9.300          | rp         | -67.1    |
| DECOUPLER           |                | lp         | -288.0   |
| dn                  | H1             | PLOT       |          |
| dof                 | 0              | wc         | 250      |
| dm                  | yyy            | sc         | 0        |
| dmm                 | w              | vs         | 29       |
| dpwr                | 42             | th         | 4        |
| dmf                 | 8900           | nm         | no ph    |

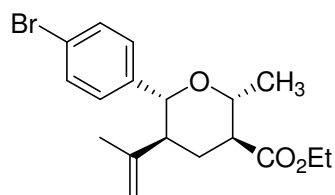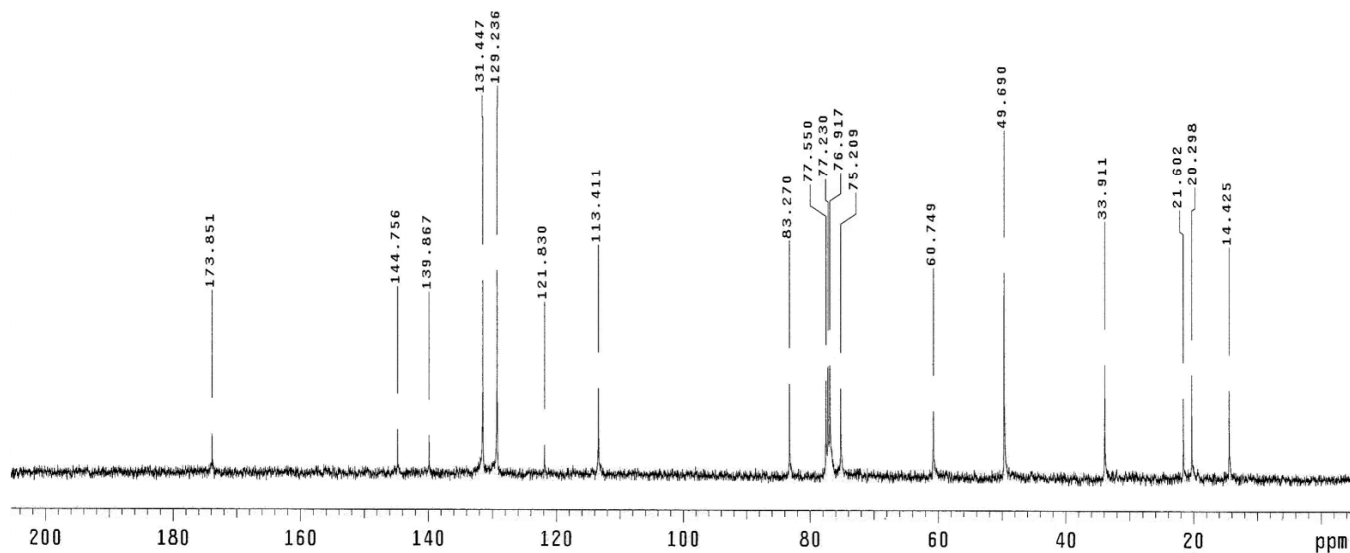

### <sup>1</sup>H NMR spectra of 3d

```
PS_395_U
exp1 s2pu1
SAMPLE
date Nov 29 2010 temp not used
solvent CDCl3 gain not used
file /export/home/~ spin not used
ciftemp/AKS_PS_395~ hst 0.008
U.fid pw90 19.700
alfa 20.000
ACQUISITION
sw 6389.8 FLAGS
at 1.998 il n
np 25528 in n
fb not used dp y
bs 4 hs nn
d1 1.000 PROCESSING
nt 32 lb 0.10
ct 32 fn 65536
TRANSMITTER
tn H1 sp -122.7
sfrq 399.853 wp 3450.8
tof 362.8 rfl 794.3
tpwr 57 rfp 0
pw 9.850 lp 113.5
DECOUPLER C13 PLOT
dn 0 wc 250
dm nnn sc 0
dmm c vs 46
dpwr 50 th 37
dmf 15900 nm cdc ph
```

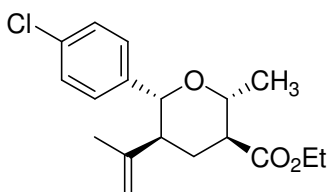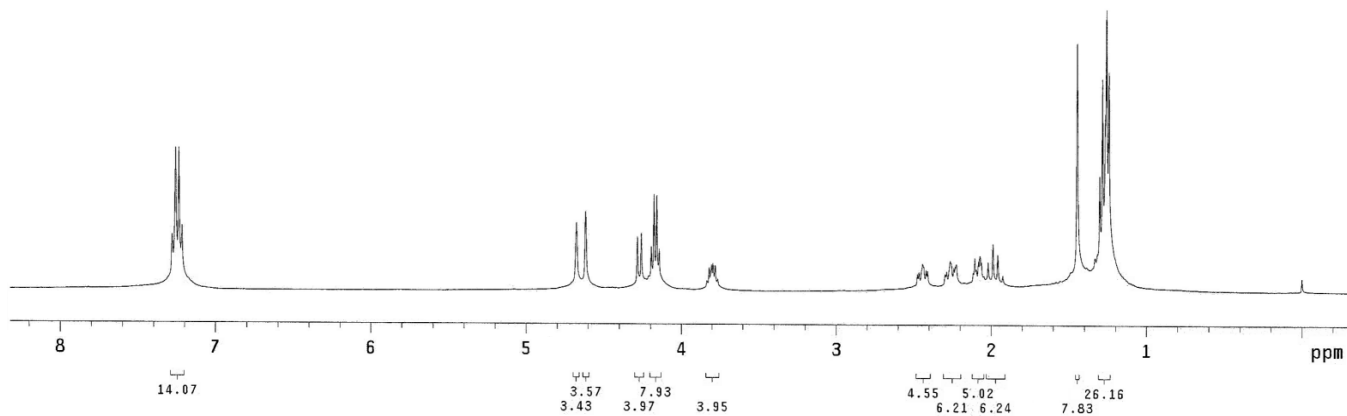



### <sup>13</sup>C NMR spectra of 3d

```
PS_395_U
exp1 s2pu1
SAMPLE
date Nov 29 2010 temp not used
solvent CDCl3 gain not used
file /export/home/~ spin not used
ciftemp/AKS_PS_395~ hst 0.008
U_C13.fid pw90 18.600
ACQUISITION alfa 20.000
sw 25125.6
at 1.199 fl
np 60270 in
fb 13800 dp
bs 16 hs
d1 1.000
nt 4000 lb PROCESSING
ct 1520 fn 65536
TRANSMITTER C13 sp DISPLAY
tn C13 sp -584.0
sfrq 100.554 wp 21328.5
tof 1536.3 rfl 9272.9
tpwr 61 rfp 7764.9
pw 9.300 rp -47.2
DECOUPLER lp -326.0
dn H1
dof 0 wc PLOT
dm yyy sc 250
dmm w vs 39
dpwr 42 th
dmf 8900 nm no ph 5
```

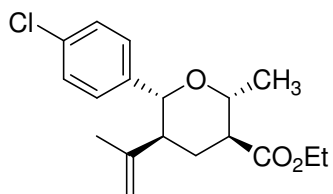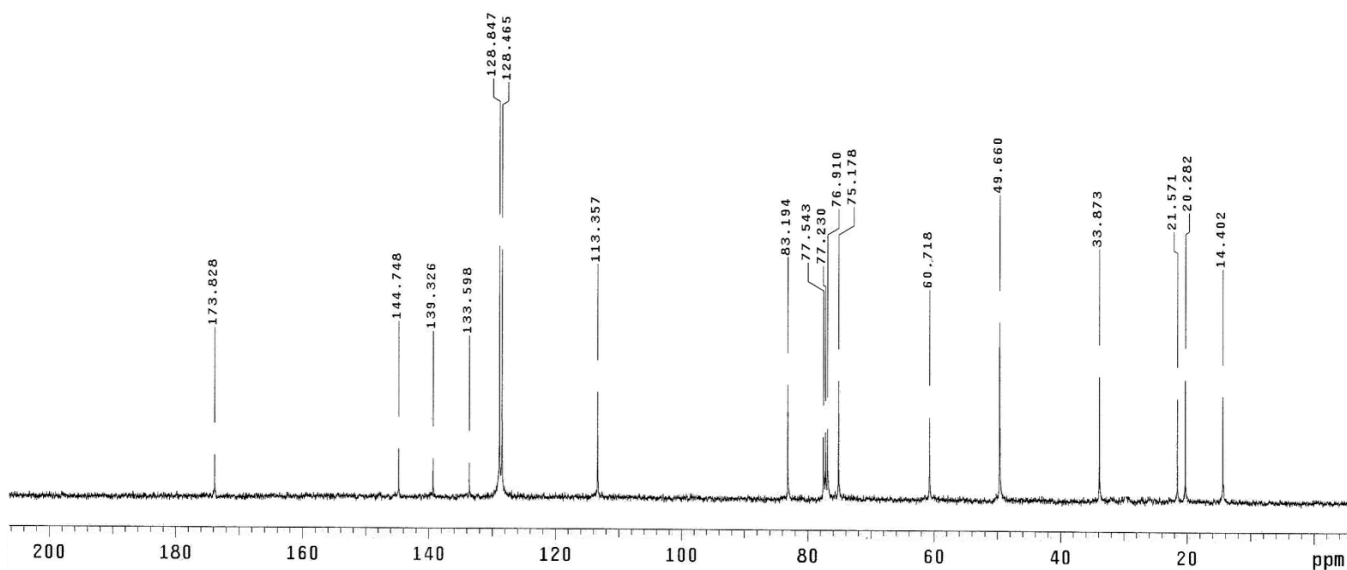

### $^1\text{H}$ NMR spectra of 3e

```
PS_396_U
exp1 s2pu1
SAMPLE
date Dec 1 2010 temp not used
solvent CDCl3 gain not used
file /export/home/~ spin not used
ciftemp/AKS_PS_396~ hst 0.008
_U.fid pw90 19.700
ACQUISITION alfa 20.000
sw 6389.8
at 1.998 il
np 25528 in
fb not used dp
bs 4 hs
d1 1.000
nt 32 lb
ct 32 fn
TRANSMITTER DISPLAY
tn H1 sp -182.9
sfrq 399.853 wp 3450.8
tof 362.8 rfl 795.8
tpwr 57 rfp 0
pw 9.850 rp 109.5
DECOUPLER lp -107.9
dn C13
dof 0 wc
dm nnn sc
dmm c vs
dpwr 50 th
dmf 15900 nm cdc ph
```

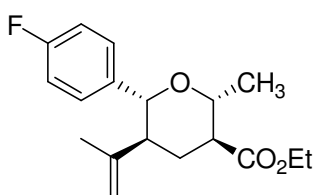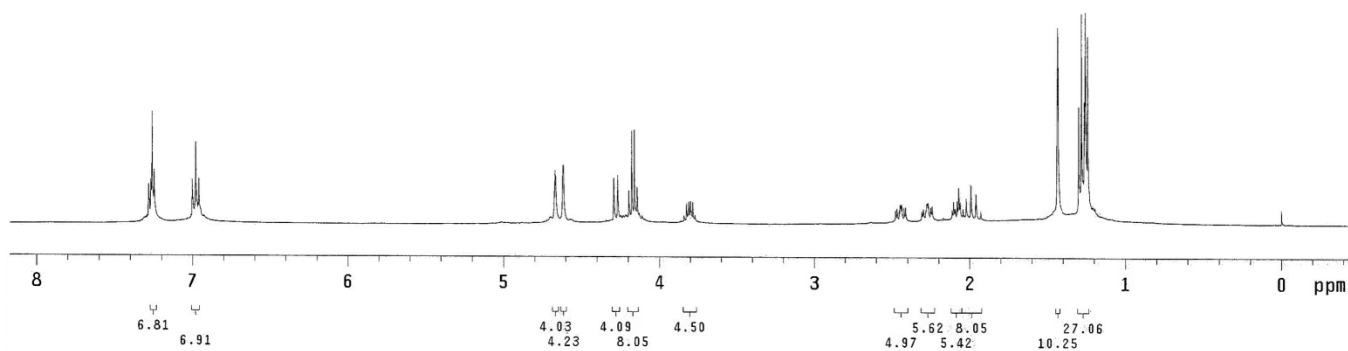

### <sup>13</sup>C NMR spectra of 3e

PS\_396\_U

exp1 s2pu1

| SAMPLE      |                | SPECIAL    |          |
|-------------|----------------|------------|----------|
| date        | Dec 1 2010     | temp       | not used |
| solvent     | CDCl3          | gain       | not used |
| file        | /export/home/~ | spin       | not used |
| ciftemp     | AKS_PS_396~    | hst        | 0.008    |
| U           | C13:fid        | pw90       | 18.600   |
|             |                | alfa       | 20.000   |
| ACQUISITION |                |            |          |
| sw          | 25125.6        | FLAGS      |          |
| at          | 1.199          | il         | n        |
| np          | 60270          | in         | n        |
| fb          | 13800          | dp         | y        |
| bs          | 16             | hs         | nn       |
| d1          | 1.000          | PROCESSING |          |
| nt          | 10000          | lb         | 2.00     |
| ct          | 10000          | fn         | 65536    |
| TRANSMITTER |                | DISPLAY    |          |
| tn          | C13            | sp         | -485.8   |
| sfrq        | 100.554        | wp         | 21229.5  |
| tof         | 1536.3         | rfl        | 9273.6   |
| tpwr        | 61             | rfp        | 7764.9   |
| pw          | 9.300          | rp         | -43.2    |
|             |                | lp         | -343.0   |
| DECOUPLER   |                | PLOT       |          |
| dn          | H1             | wc         | 250      |
| dof         | 0              | sc         | 0        |
| dm          | yvy            | vs         | 37       |
| dmm         | w              | th         | 3        |
| dpwr        | 42             | nm         | no       |
| dmf         | 8900           |            | ph       |

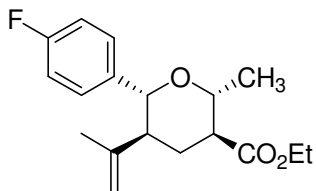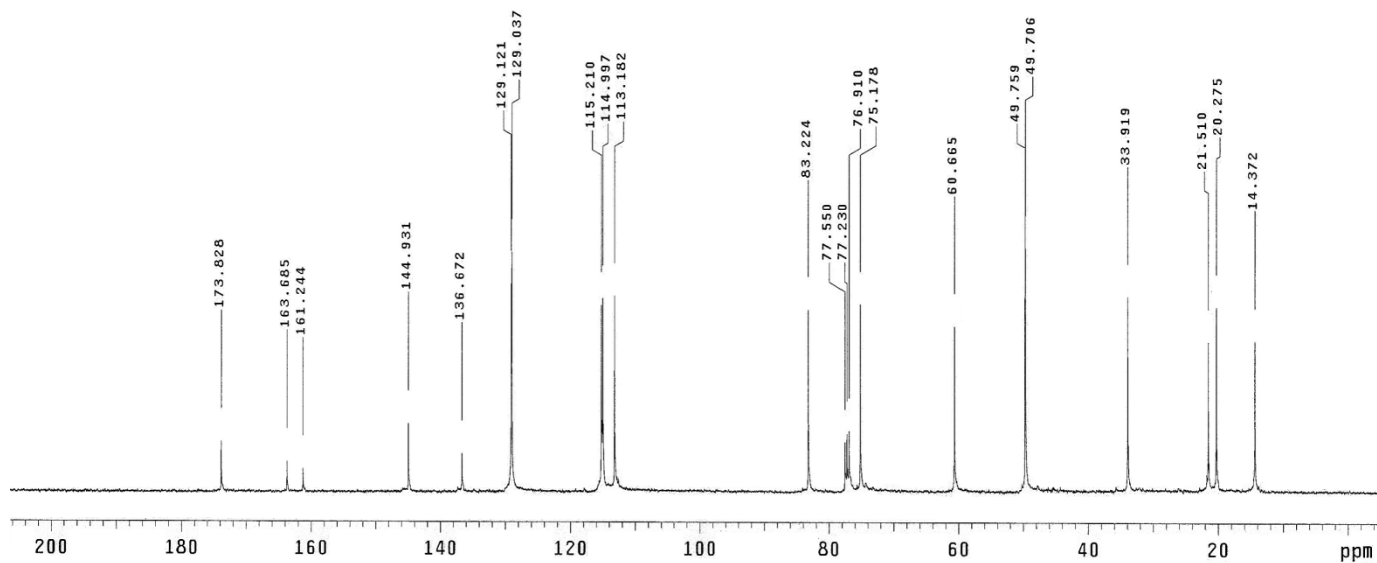

### <sup>19</sup>F NMR spectra of 3e

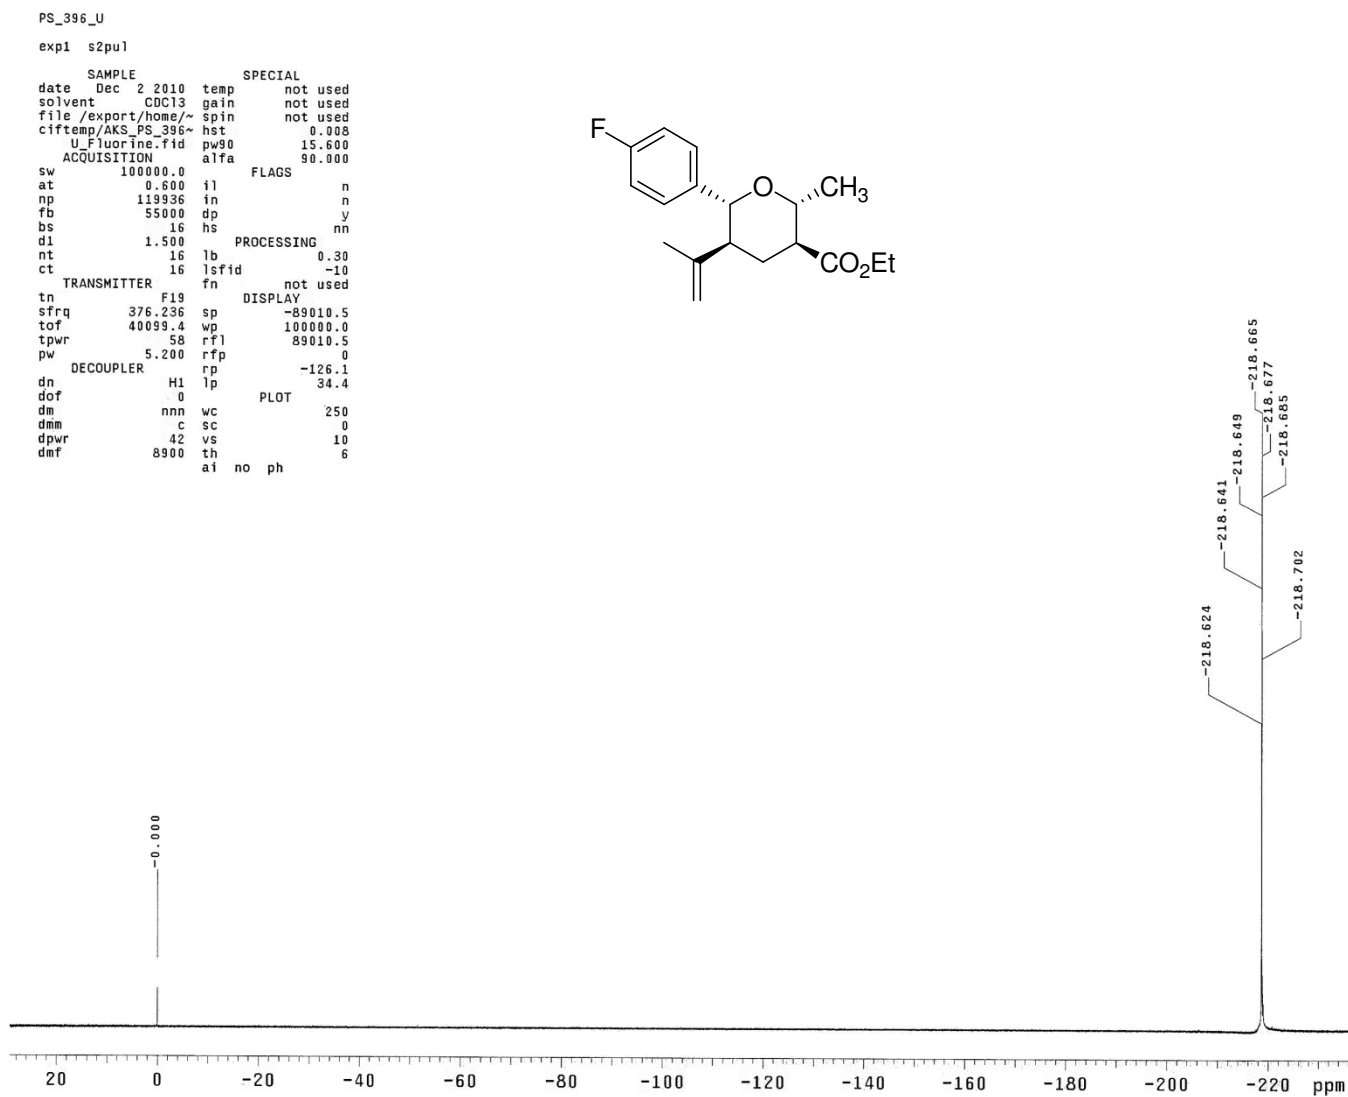

### <sup>1</sup>H NMR spectra of 3f

```
PS_391_U
exp1 std1h
SAMPLE          SPECIAL
date Nov 16 2010 temp not used
solvent CDC13 gain not used
file /export/home/ spin not used
ciftemp/AKS_PS_391~ hst 0.008
                _U.fid pw90 19.700
ACQUISITION    alfa 20.000
sw 6006.0
at 1.995 il FLAGS n
np 23984 in n
fb not used dp y
bs 16 hs nn
d1 1.000
nt 100 fn PROCESSING not used
ct 100 DISPLAY
tn TRANSMITTER H1 sp -167.2
sfrq 399.853 rf1 wp 3614.3
tof 0 rfp 0
tpwr 57 rp 110.1
pw 7.000 lp -77.9
DECOUPLER C13 wc PLOT 250
dof 0 sc 0
dm nnn vs 44
dmm c th 65
dpwr 50 nm cdc ph
dmf 15900
```

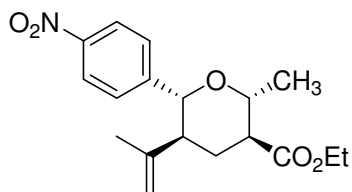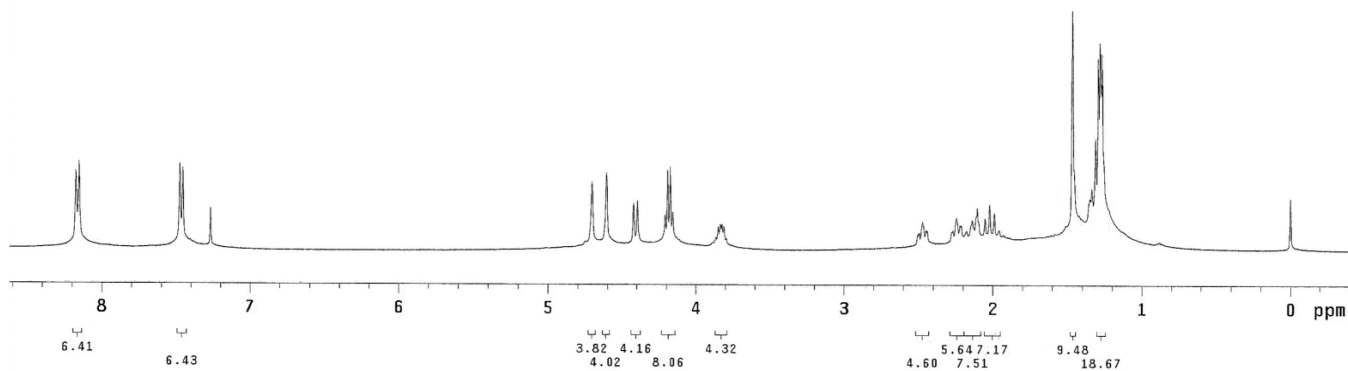

### <sup>13</sup>C NMR spectra of 3f

```
PS_340_U
exp1 s2pu1
SAMPLE
date Aug 27 2010 temp not used
solvent CDCl3 gain not used
file /export/home/~ spin not used
guest123/AKS_PS_34~ hst 0.008
0U_C13.F1d pw90 18.600
ACQUISITION alfa 20.000
sw 25125.6 FLAGS
at 1.199 f1 n
np 60270 in n
fb 13800 dp y
bs 16 hs nn
d1 1.000 PROCESSING
nt 4000 lb 2.00
ct 4000 fn 65536
TRANSMITTER C13 sp DISPLAY -513.4
sfrq 100.554 wp 21229.5
tof 1536.3 rfl 9268.3
tpwr 61 rfp 7764.9
pw 9.300 rp -18.6
DECOUPLER lp -390.3
dn H1 PLOT
dof 0 wc 250
dm yyy sc 0
dmm w vs 37
dpwr 42 th 3
dmf 8900 nm no ph
```

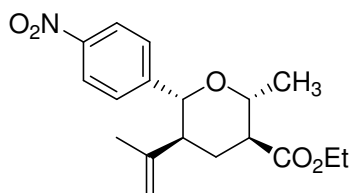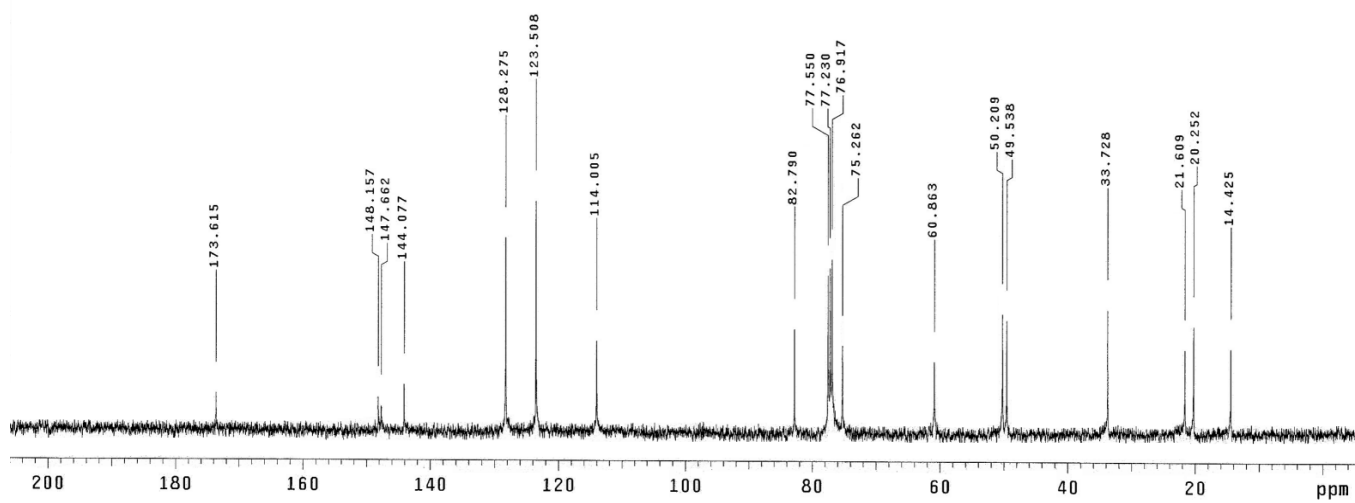

### <sup>1</sup>H NMR spectra of 3g

PS\_338\_U

exp1 s2pu1

```
SAMPLE          SPECIAL
date Aug 6 2010 temp      not used
solvent CDC13 gain      not used
file /export/home/~ spin  not used
guest123/AKS_PS_33~ hst   0.008
8_U.fid pw90 19.700
ACQUISITION alfa 20.000
sw 6389.8
at 1.998 il n
np 25528 in n
fb not used dp y
bs 4 hs nn
dl 1.000
nt 32 lb 0.10
ct 32 fn 65536
TRANSMITTER H1 sp DISPLAY -108.0
tn 399.853 wp 3531.4
sfrq 362.8 rfl 786.9
tof 57 rfp 0
tpwr 9.850 rp 125.8
pw DECOUPLER lp -81.9
dn C13
dof 0 wc PLOT 250
dm nnn sc 0
dmm c vs 42
dpwr 50 th 50
dmf 15900 nm cdc ph
```

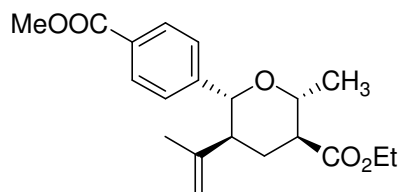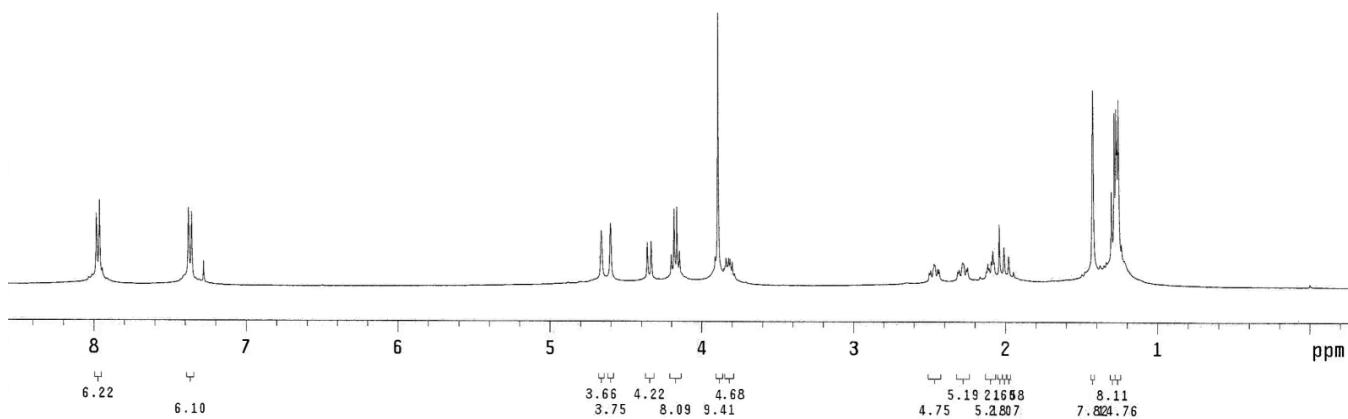

### <sup>13</sup>C NMR spectra of 3g

PS\_338\_U

exp1 s2pu1

| SAMPLE              |                | SPECIAL    |          |
|---------------------|----------------|------------|----------|
| date                | Aug 6 2010     | temp       | not used |
| solvent             | CDCl3          | gain       | not used |
| file                | /export/home/~ | spin       | not used |
| guest123/AKS_PS_33~ |                | hst        | 0.008    |
| 8U C13.Fid          |                | pw90       | 18.600   |
| ACQUISITION         | alfa           |            | 20.000   |
| sw                  | 25125.6        | FLAGS      |          |
| at                  | 1.199          | il         | n        |
| np                  | 60270          | in         | n        |
| fb                  | 13800          | dp         | y        |
| bs                  | 16             | hs         | nn       |
| d1                  | 1.000          | PROCESSING |          |
| nt                  | 3000           | lb         | 2.00     |
| ct                  | 992            | fn         | 65536    |
| TRANSMITTER         |                | DISPLAY    |          |
| tn                  | C13            | sp         | -492.7   |
| sfrq                | 100.554        | wp         | 21163.6  |
| tof                 | 1536.3         | rfl        | 9280.5   |
| tpwr                | 61             | rfp        | 7764.9   |
| pw                  | 9.300          | rp         | -45.6    |
| DECOUPLER           |                | lp         | -314.3   |
| dn                  | H1             | PLOT       |          |
| dof                 | 0              | wc         | 250      |
| dm                  | yyy            | sc         | 0        |
| dmm                 | w              | vs         | 39       |
| dpwr                | 42             | th         | 3        |
| dmf                 | 8900           | nm         | no ph    |

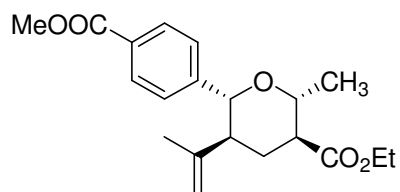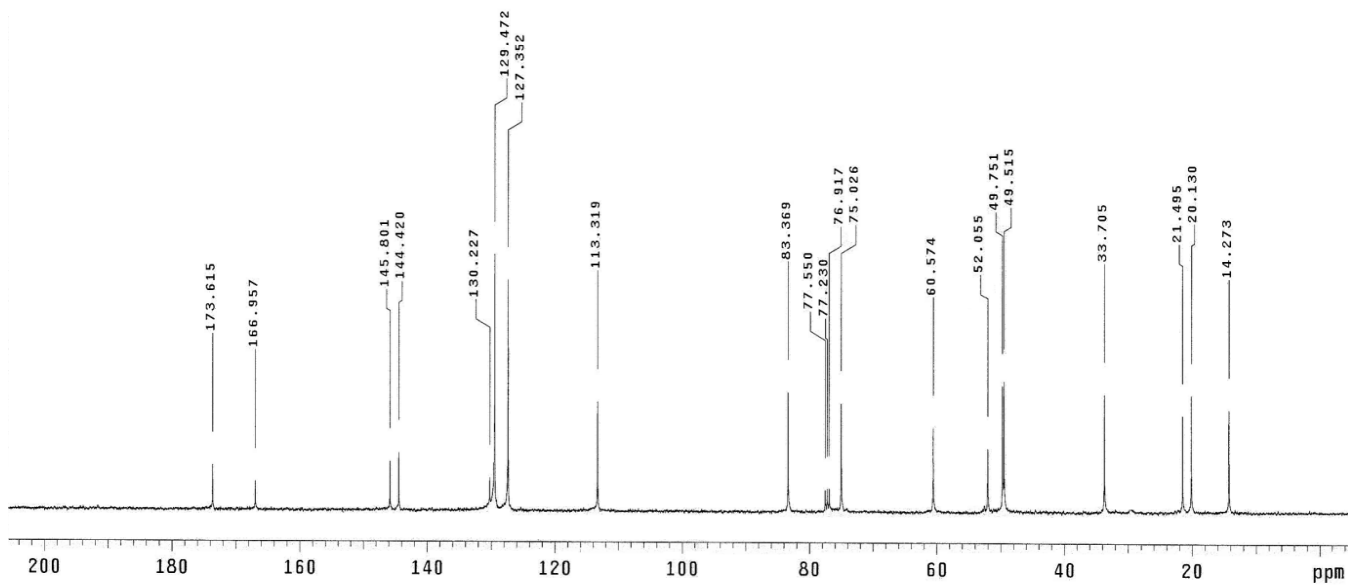



### <sup>1</sup>H NMR spectra of 3h

```
PS_468_U
exp1 s2pul
SAMPLE
date Mar 23 2011 temp not used
solvent CDCl3 gain not used
file exp spin not used
ACQUISITION hst 0.008
sw 6389.8 pw90 19.700
at 1.998 alfa 20.000
np 25528
fb not used il n
bs 8 in n
d1 1.000 dp y
nt 100 hs nn
ct 100
PROCESSING
tn H1 lb 0.10
sfrq 399.853 fn 65536
tof 362.8 sp -194.2
tpwr 57 wp 3576.8
pw 9.850 rfl 790.4
DECOUPLER rfp 0
dn C13 rp 105.1
dof 0 lp -55.9
dm nnn
dmm c wc 250
dpwr 50 sc 0
dmf 15900 vs 40
nm cdc ph th 20
```

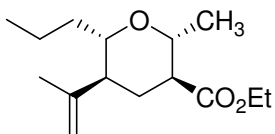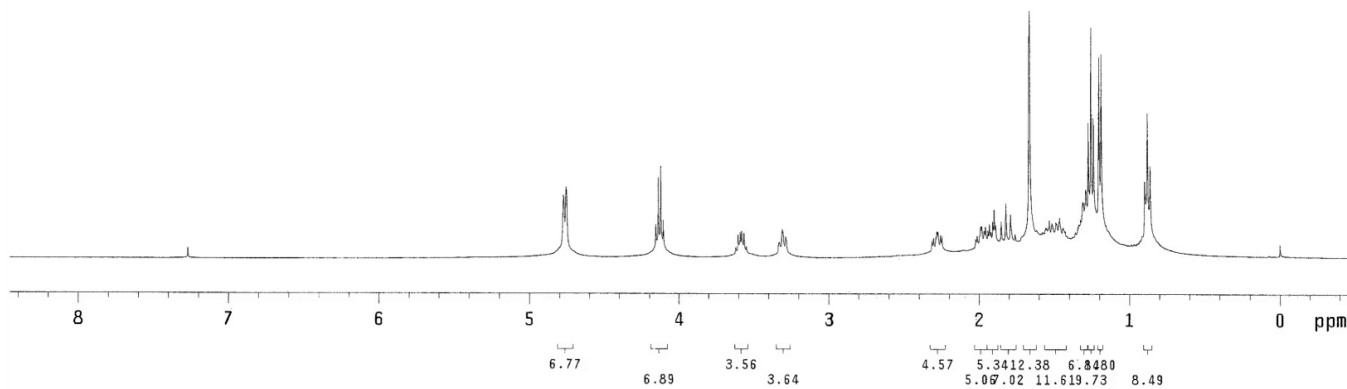

### <sup>13</sup>C NMR spectra of 3h

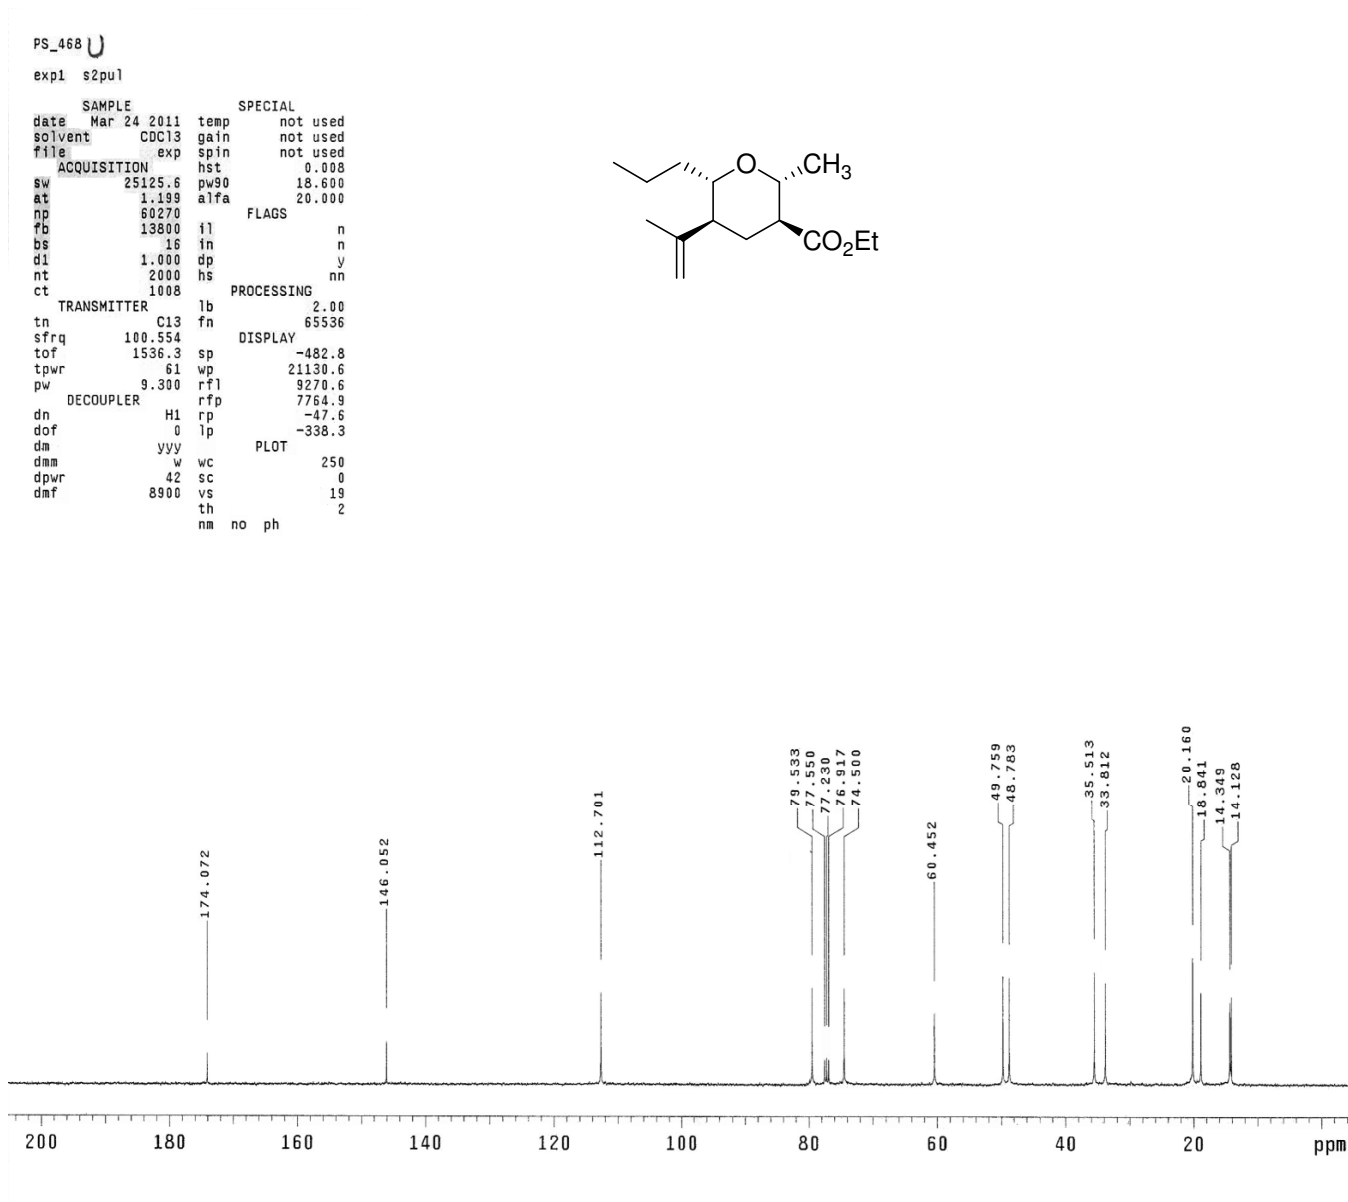

### <sup>1</sup>H NMR spectra of 3i

PS\_415\_U

exp1 s2pul

|             |                |            |          |         |
|-------------|----------------|------------|----------|---------|
| date        | Dec 27 2010    | temp       | not used | SPECIAL |
| solvent     | CDC13          | gain       | not used |         |
| file        | /export/home/~ | spin       | not used |         |
| ciftemp     | /AKS_PS_415~   | hst        | 0.008    |         |
|             | _U1.fid        | pw90       | 19.700   |         |
| ACQUISITION | alfa           |            | 20.000   |         |
| sw          | 6389.8         | FLAGS      |          |         |
| at          | 1.998          | il         | n        |         |
| np          | 25528          | in         | n        |         |
| fb          | not used       | dp         | y        |         |
| bs          | 4              | hs         | nn       |         |
| di          | 1.000          | PROCESSING |          |         |
| nt          | 32             | lb         | 0.10     |         |
| ct          | 32             | fn         | 65536    |         |
| TRANSMITTER | H1             | sp         | -144.3   | DISPLAY |
| sfrq        | 399.853        | wp         | 3484.6   |         |
| tof         | 362.8          | rfl        | 790.8    |         |
| tpwr        | 57             | rfp        | 0        |         |
| pw          | 9.850          | rp         | 110.1    |         |
| DECOUPLER   | C13            | lp         | -90.9    |         |
| dn          | 0              | wc         | 250      | PLOT    |
| dof         | nnn            | sc         | 0        |         |
| dmm         | c              | vs         | 83       |         |
| dpwr        | 50             | th         | 20       |         |
| dmf         | 15900          | nm         | cdc      | ph      |

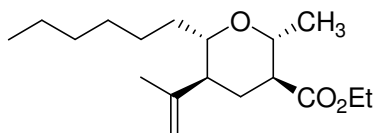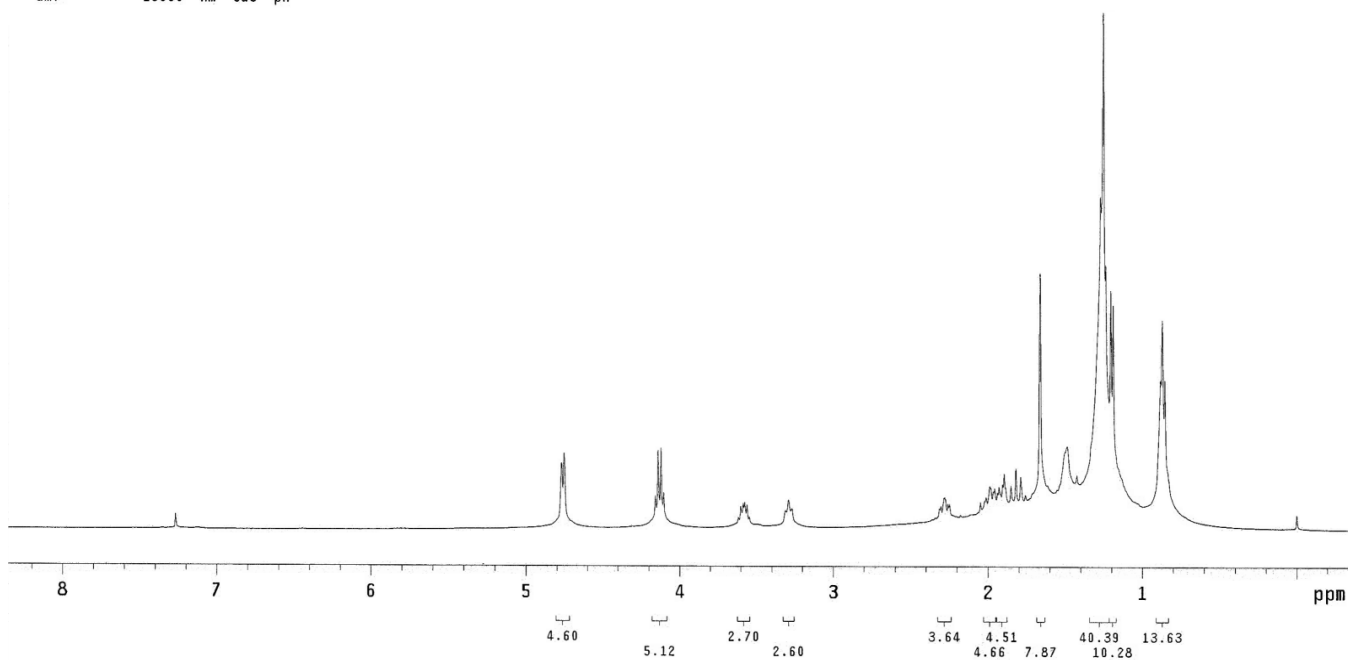

### <sup>13</sup>C NMR spectra of 3i

```
PS_417_U
exp1 s2pu1
SAMPLE
date Dec 29 2010 temp not used
solvent CDC13 gain not used
file /export/home/~ spin not used
ciftemp/AKS_PS_417~ hst 0.008
U_C13.fid pw90 18.600
ACQUISITION alfa 20.000
sw 25125.6
at 1.199 il
np 60270 in
fb 13800 dp
bs 16 hs
d1 1.000 PROCESSING
nt 3000 lb 2.00
ct 2672 fn 65536
TRANSMITTER C13 sp
tn -579.4
sfrq 100.554 wp 21262.5
tof 1536.3 rfj
tpwr 61 rfp 7764.9
pw 9.300 rp -47.5
DECOUPLER lp -334.5
dn H1 PLOT
dof 0 wc 250
dm vvy sc 0
dmm w vs 19
dpwr 42 th 2
dmf 8900 nm no ph
```

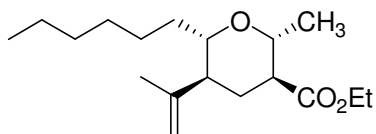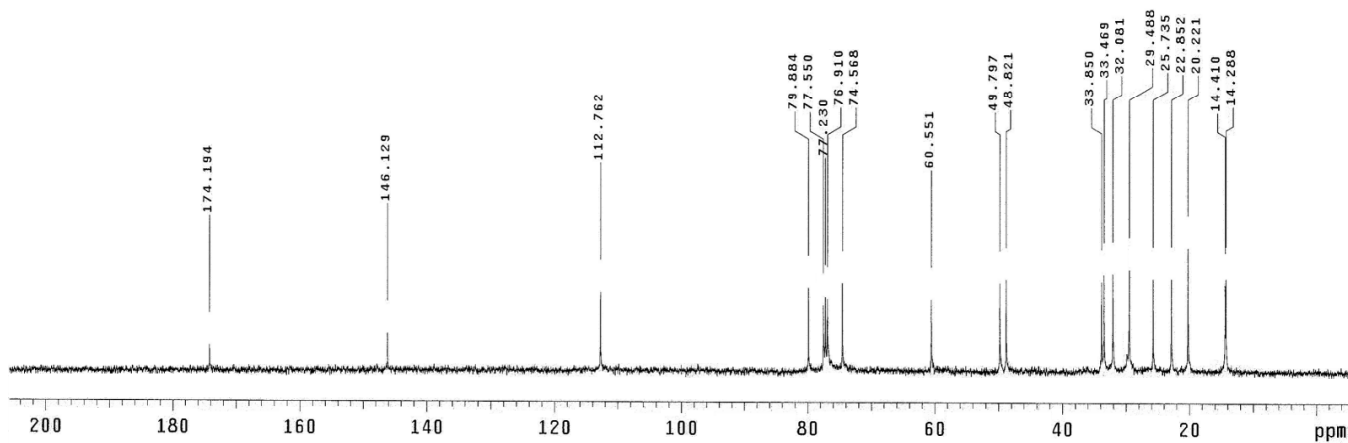

### $^1\text{H}$ NMR spectra of 3j

```
PS_413_U
exp1 s2pu1
SAMPLE
date Dec 24 2010 temp not used
solvent CDCl3 gain not used
file /export/home/~ spin not used
ciftemp/AKS_PS_413~ hst 0.008
U.fid pw90 19.700
ACQUISITION alfa 20.000
sw 6389.8 FLAGS
at 1.998 il n
np 25528 in n
fb not used dp y
bs 4 hs nn
d1 1.000 PROCESSING
nt 32 lb 0.10
ct 32 fn 65536
TRANSMITTER H1 sp DISPLAY
tn 399.853 wp -144.3
sfrq 362.8 rfl 3526.5
tof 57 rfp 790.8
tpwr 0
pw 9.850 rp 123.4
DECOUPLER C13 lp -62.6
dn dof 0 wc PLOT 250
dm dmm c vs 42
dpwr 50 th 20
dmf 15900 nm cdc ph
```

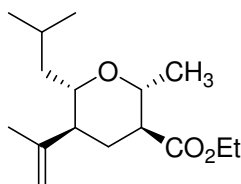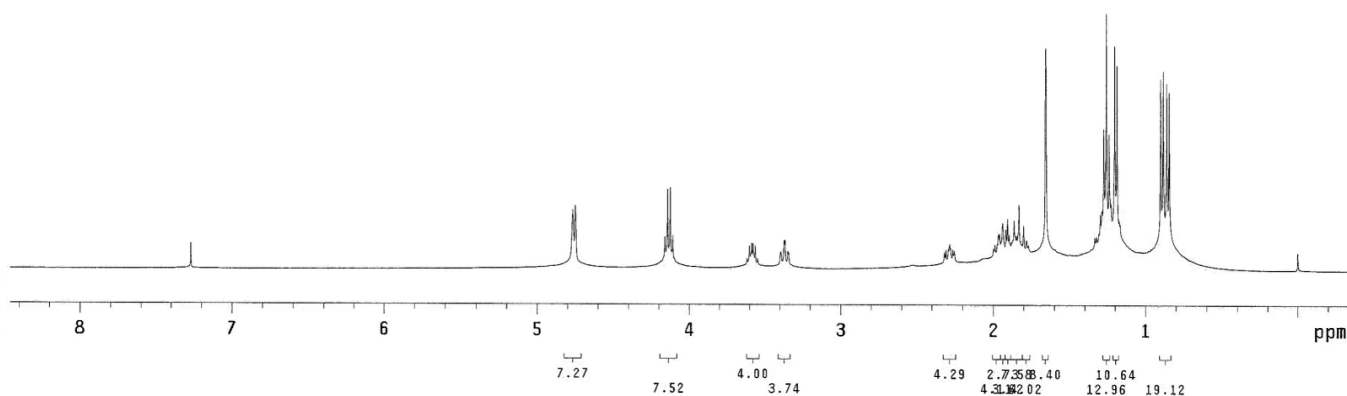

### <sup>13</sup>C NMR spectra of 3j

```
PS_413_U
exp1 std13c
SAMPLE
date Dec 24 2010 temp not used
solvent CDC13 gain not used
file /export/home/~ spin not used
ciftemp/AKS_PS_413~ hst 0.008
U_C13.fid pw90 18.600
ACQUISITION alfa 20.000
sw 25000.0
at 1.199 il n
np 59968 in n
fb 13800 dp y
bs 16 hs nn
d1 0
nt 3000 lb 1.00
ct 2544 fn not used
TRANSMITTER
tn C13 sp -578.1
sfrq 100.552 wp 21189.0
tof 0 rfl 10741.0
tpwr 61 rfp 7764.9
pw 8.667 rp -31.3
DECOUPLER lp -354.1
dn H1
dof 0 wc 250
dm yy sc 0
dmm w vs 24
dpwr 42 th 3
dmf 8900 nm no ph
```

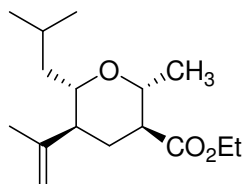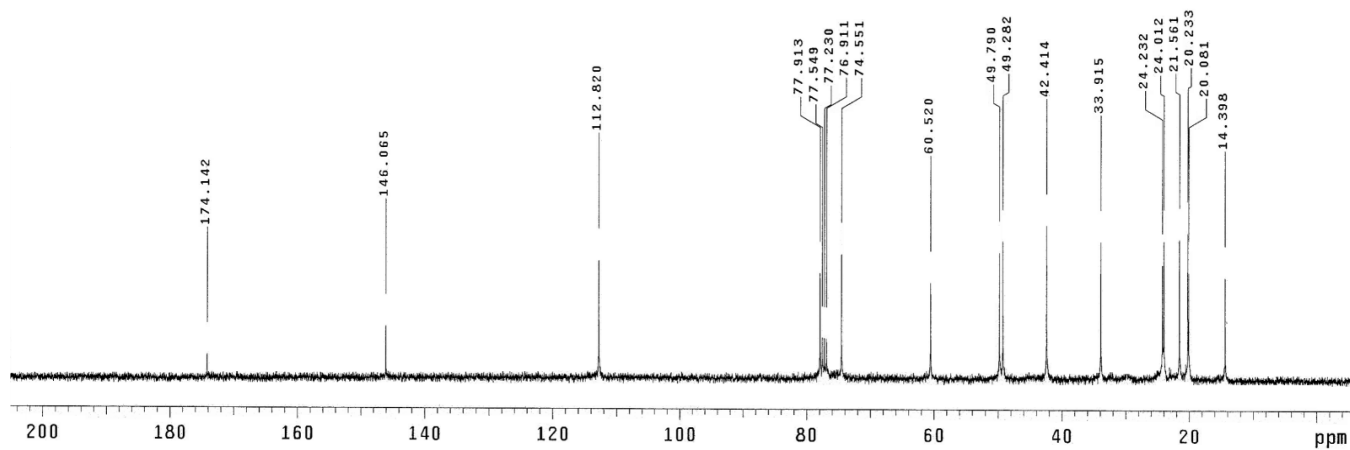

### <sup>1</sup>H NMR spectra of 3k

PS\_456\_U

expl s2pu1

| SAMPLE      |                | SPECIAL    |          |
|-------------|----------------|------------|----------|
| date        | Feb 28 2011    | temp       | not used |
| solvent     | CDCl3          | gain       | not used |
| file        | /export/home/~ | spin       | not used |
| ciftemp     | AKS_PS_456~    | hst        | 0.008    |
|             | _U.fid         | pw90       | 19.700   |
|             |                | alfa       | 20.000   |
| ACQUISITION |                | FLAGS      |          |
| sw          | 6389.8         |            |          |
| at          | 1.998          | il         | n        |
| np          | 25528          | in         | n        |
| fb          | not used       | dp         | y        |
| bs          | 8              | hs         | nn       |
| dl          | 1.000          | PROCESSING |          |
| nt          | 100            | ib         | 0.10     |
| ct          | 100            | fn         | 65536    |
| TRANSMITTER |                | DISPLAY    |          |
| tn          | H1             | sp         | -192.9   |
| sfrq        | 399.853        | wp         | 3618.7   |
| tof         | 362.8          | rfl        | 797.4    |
| tpwr        | 57             | rfp        | 0        |
| pw          | 9.850          | rp         | 116.8    |
|             |                | lp         | -103.9   |
| DECOUPLER   |                | PLOT       |          |
| dn          | C13            |            |          |
| dof         | 0              | wc         | 250      |
| dm          | nn             | sc         | 0        |
| dmm         | c              | vs         | 52       |
| dpwr        | 50             | th         | 8        |
| dmf         | 15900          | nm         | cdc ph   |

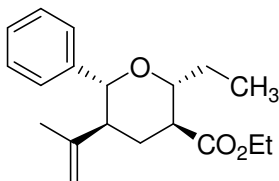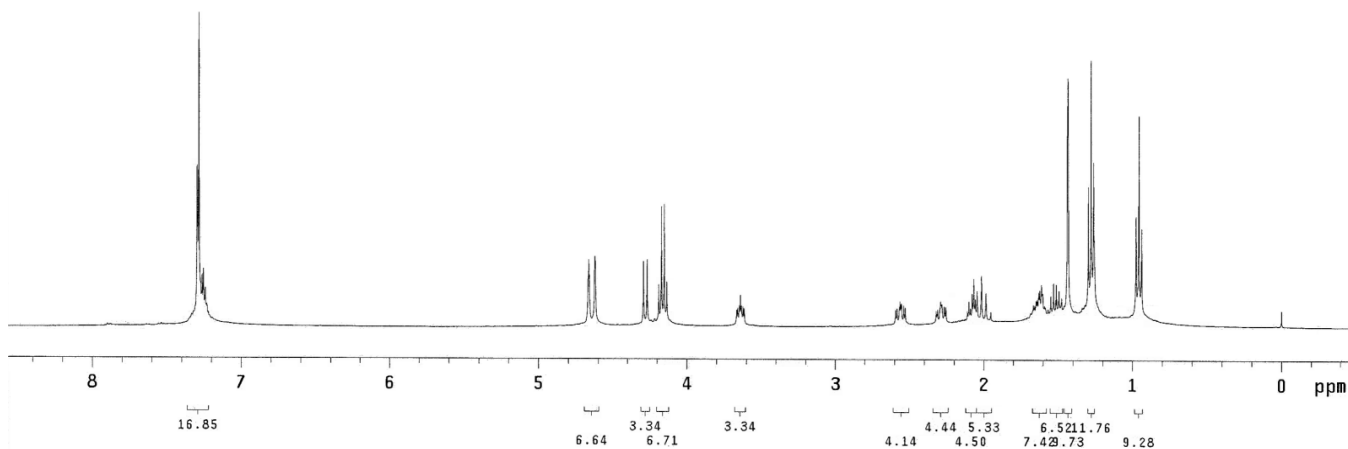

### <sup>13</sup>C NMR spectra of 3k

```
PS_456_U
expl s2pu1

SAMPLE          SPECIAL
date Mar 1 2011 temp not used
solvent CDCl3 gain not used
file /export/home/~ spin not used
ciftemp/AKS_PS_456~ hst 0.008
U C13.fid pw90 18.600
ACQUISITION alfa 20.000
sw 25125.6 FLAGS
at 1.199 il n
np 60270 in n
fb 13800 dp y
bs 16 hs nn
di 1.000 PROCESSING
nt 8000 lb 2.00
ct 8000 fn 65536

TRANSMITTER C13 sp DISPLAY
tn C13 sp -449.0
sfrq 100.554 wp 21096.9
tof 1536.3 rfp 9269.8
tpwr 61 rfp 7764.9
pw 9.300 rp -89.1
DECOUPLER lp -290.8

dn H1 PLOT
dof 0 wc 250
dm yyy sc 0
dmm w vs 25
dpwr 42 th
dmf 8900 nm no ph 4
```

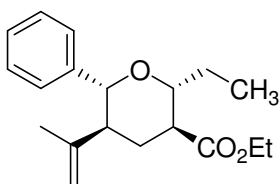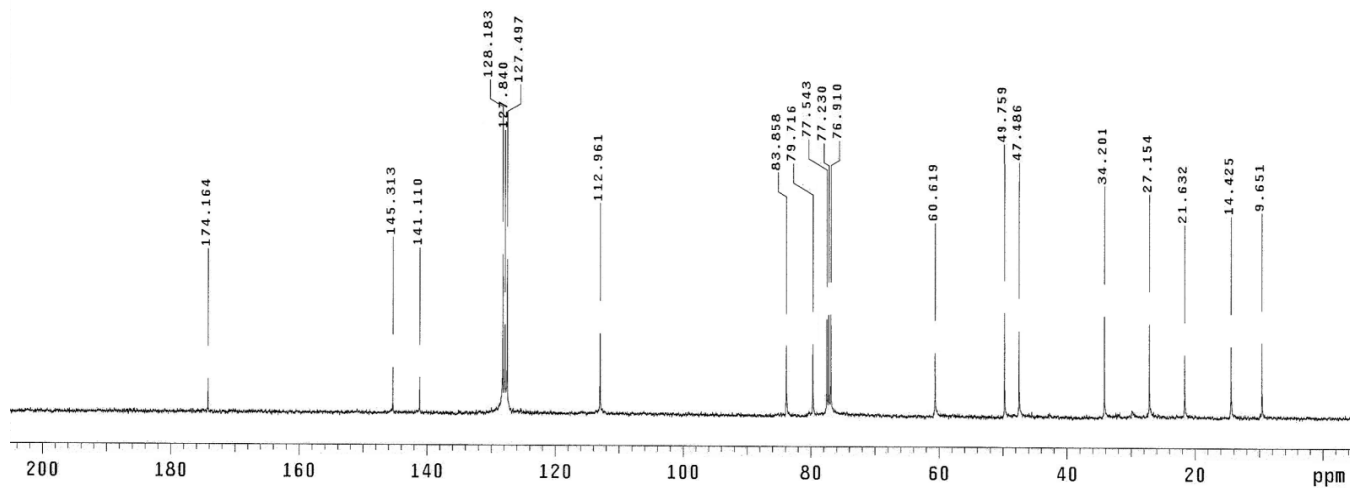



### <sup>1</sup>H NMR spectra of 3l

PS\_464\_U

expl s2pu1

```
SAMPLE SPECIAL
date Mar 14 2011 temp not used
solvent CDCl3 gain not used
file exp spin not used
ACQUISITION hst 0.008
sw 6389.8 pw90 19.700
at 1.998 alfa 20.000
np 25528
fb not used il n
bs 8 in n
d1 1.000 dp y
nt 100 hs nn
ct 100
TRANSMITTER lb 0.10
tn H1 fn 65536
sfrq 399.853
tof 362.8 sp -166.7
tpwr 57 wp 3543.3
pw 9.850 rfl 796.4
DECOUPLER rfp 0
dn C13 rp 115.3
dof 0 lp -71.1
dm nnn
dmm c wc 250
dpwr 50 sc 0
dmf 15900 vs 46
nm cdc ph 15
```

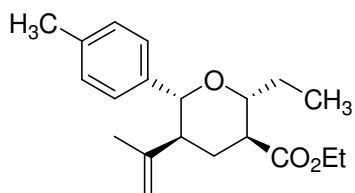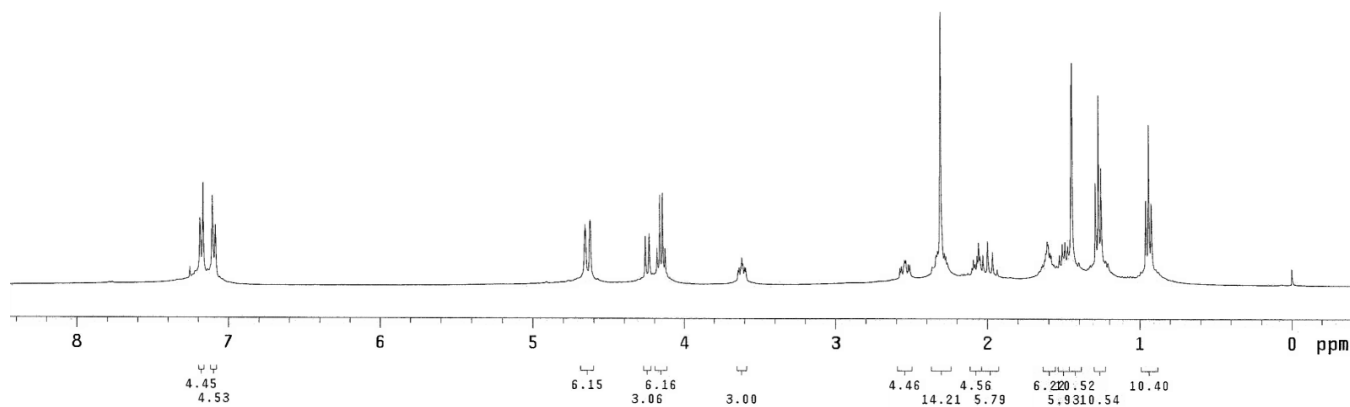

### <sup>13</sup>C NMR spectra of 3l

PS\_464\_U

exp1 s2pu1

| SAMPLE      |             | SPECIAL    |          |
|-------------|-------------|------------|----------|
| date        | Mar 14 2011 | temp       | not used |
| solvent     | CDCl3       | gain       | not used |
| file        | exp         | spin       | not used |
| ACQUISITION |             | hst        | 0.008    |
| sw          | 25125.6     | pw90       | 18.600   |
| at          | 1.199       | alfa       | 20.000   |
| np          | 60270       | FLAGS      |          |
| fb          | 13800       | fl         | n        |
| bs          | 16          | in         | n        |
| d1          | 1.000       | dp         | y        |
| nt          | 4000        | hs         | nn       |
| ct          | 3024        | PROCESSING |          |
| TRANSMITTER | lb          |            | 2.00     |
| tn          | C13         | fn         | 65536    |
| sfrq        | 100.554     | DISPLAY    |          |
| tof         | 1536.3      | sp         | -452.9   |
| tpwr        | 61          | wp         | 21030.9  |
| pw          | 9.300       | rfl        | 9273.6   |
| DECOUPLER   |             | rfp        | 7764.9   |
| dn          | H1          | rp         | -71.2    |
| dof         | 0           | lp         | -301.8   |
| dm          | yyy         | PLOT       |          |
| dmm         | w           | wc         | 250      |
| dpwr        | 42          | sc         | 0        |
| dmf         | 8900        | vs         | 35       |
|             |             | th         | 4        |
|             |             | nm         | no ph    |

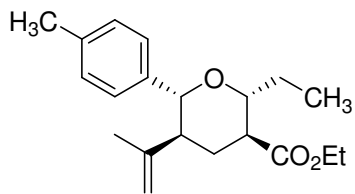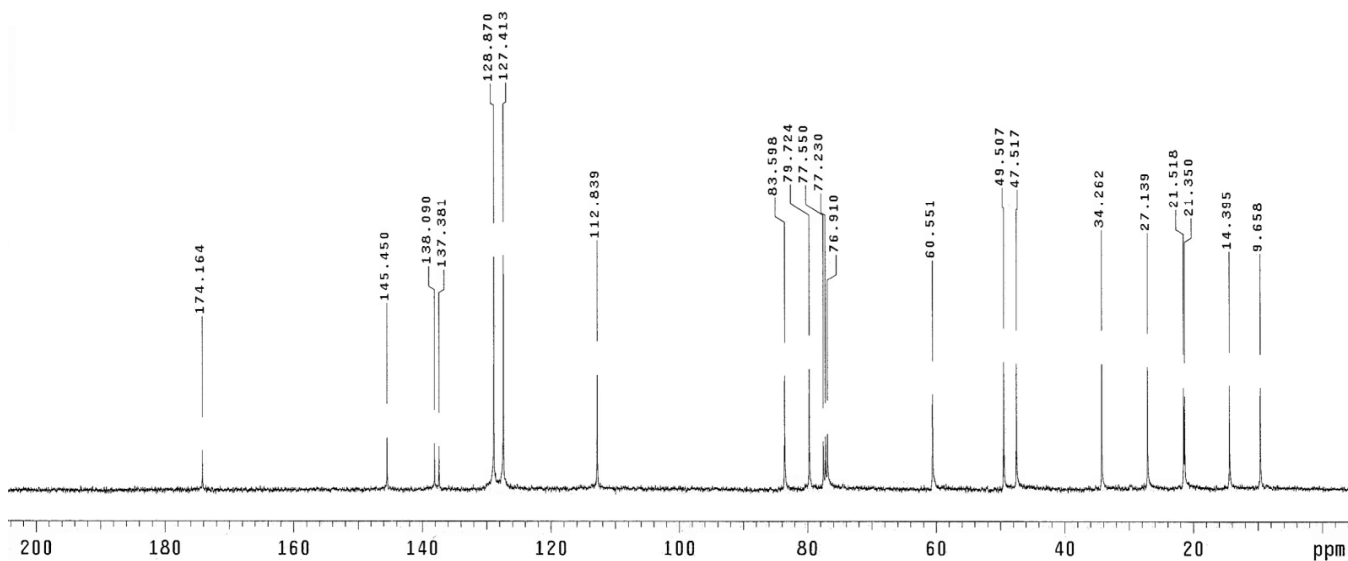

### <sup>1</sup>H NMR spectra of 3m

PS\_458\_U

exp1 s2pu1

| SAMPLE              |                | SPECIAL    |          |
|---------------------|----------------|------------|----------|
| date                | Mar 2 2011     | temp       | not used |
| solvent             | CDCl3          | gain       | not used |
| file                | /export/home/~ | spin       | not used |
| ciftemp/AKS_PS_458~ |                | hst        | 0.008    |
| U.fid               |                | pw90       | 19.700   |
| ACQUISITION         | alfa           |            | 20.000   |
| sw                  | 6389.8         | FLAGS      |          |
| at                  | 1.998          | il         | n        |
| np                  | 25528          | in         | n        |
| fb                  | not used       | dp         | y        |
| bs                  | 8              | hs         | nn       |
| d1                  | 1.000          | PROCESSING |          |
| nt                  | 100            | lb         | 0.10     |
| ct                  | 100            | fn         | 65536    |
| TRANSMITTER         |                | DISPLAY    |          |
| tn                  | H1             | sp         | -236.5   |
| sfrq                | 399.853        | wp         | 3694.4   |
| tof                 | 362.8          | rfl        | 790.6    |
| tpwr                | 57             | rffp       | 0        |
| pw                  | 9.850          | rp         | 111.7    |
| DECOUPLER           | l1p            |            | -95.9    |
| dn                  | C13            | PLOT       |          |
| dof                 | 0              | wc         | 250      |
| dm                  | nnn            | sc         | 0        |
| dmm                 | c              | vs         | 57       |
| dpwr                | 50             | th         | 62       |
| dmf                 | 15900          | nm         | cdc ph   |

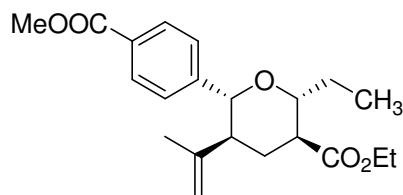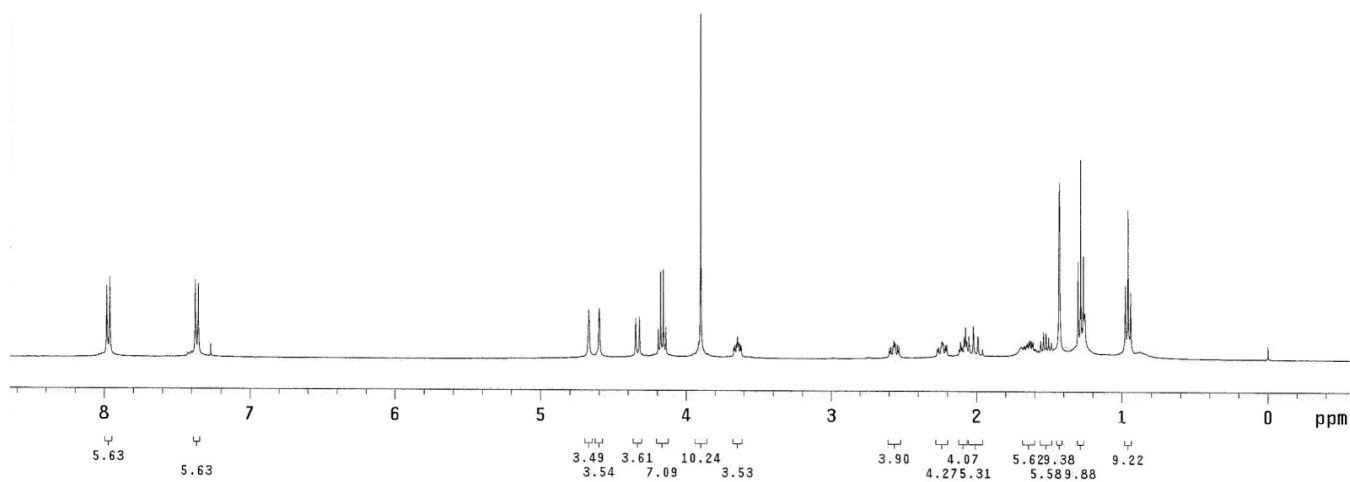

### <sup>13</sup>C NMR spectra of 3m

```
PS_458_U
exp1 s2pu1
SAMPLE
date Mar 2 2011 temp not used
solvent CDCl3 gain not used
file /export/home/~ spin not used
ciftemp/AKS_PS_458~ hst 0.008
U_C13.fid pw90 18.600
ACQUISITION alfa 20.000
sw 25125.6 FLAGS
at 1.199 il n
np 60270 in n
fb 13800 dp y
bs 16 hs nn
d1 1.000 PROCESSING
nt 5000 lb 2.00
ct 4640 fn 65536
TRANSMITTER C13 sp -515.7
sfrq 100.554 wp 21130.6
tof 1536.3 rfl 9270.6
tpwr 61 rfp 7764.9
pw 9.300 rp -56.4
DECOUPLER H1 lp -332.0
dn
dof 0 wc 250
dm yyv sc 0
dmm w vs 41
dpwr 42 th 4
dmf 8900 nm no ph
```

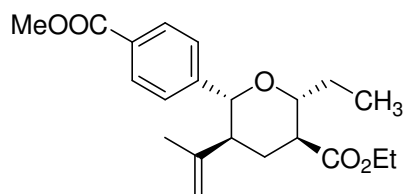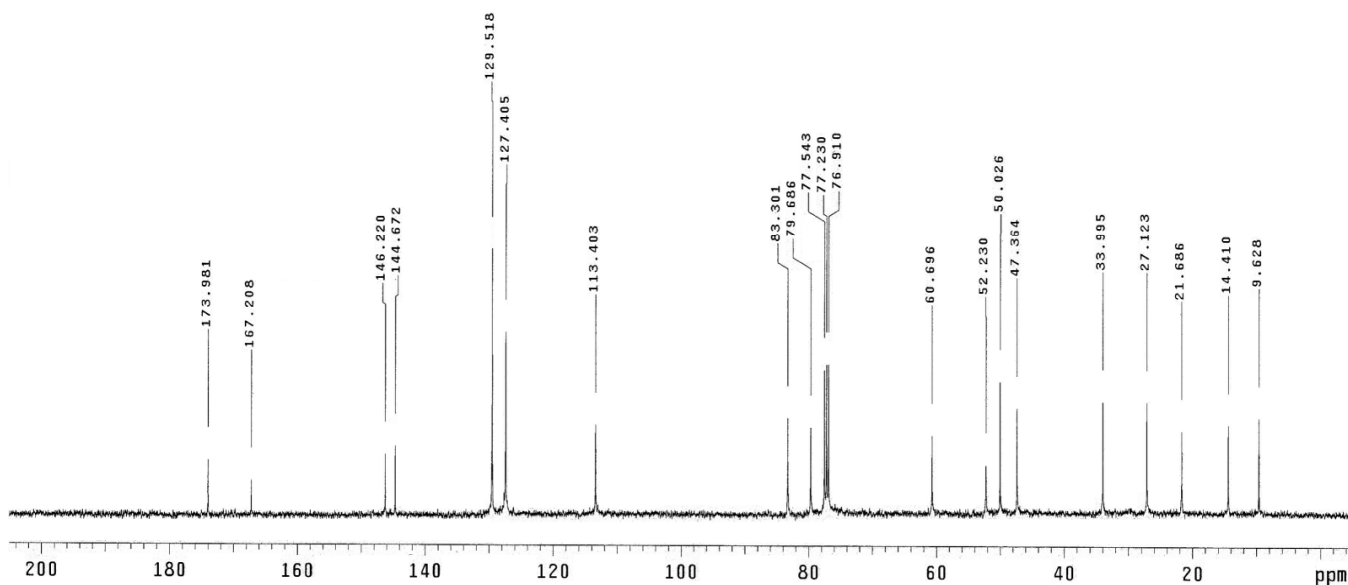

### <sup>1</sup>H NMR spectra of 3n

PS\_463\_U

exp1 s2pu1

|             |             |            |          |      |
|-------------|-------------|------------|----------|------|
| date        | Mar 12 2011 | temp       | not used |      |
| solvent     | CDCl3       | gain       | not used |      |
| file        | exp         | spin       | not used |      |
| ACQUISITION |             | hst        | 0.008    |      |
| sw          | 6389.8      | pw90       | 19.700   |      |
| at          | 1.998       | alfa       | 20.000   |      |
| np          | 25528       | FLAGS      |          |      |
| fb          | not used    | il         | n        |      |
| bs          | 8           | in         | n        |      |
| d1          | 1.000       | dp         | y        |      |
| nt          | 100         | hs         | nn       |      |
| ct          | 100         | PROCESSING |          |      |
| tn          | H1          |            | lb       | 0.10 |
| sfrq        | 399.853     | fn         | 65536    |      |
| tof         | 362.8       | DISPLAY    |          |      |
| tpwr        | 57          | sp         | -238.1   |      |
| pw          | 9.850       | wp         | 3652.5   |      |
| DECOUPLER   |             | rfl        | 792.1    |      |
| dn          | C13         | rfp        | 0        |      |
| dof         | 0           | rp         | 111.9    |      |
| dm          | nnn         | lp         | -86.1    |      |
| dmm         | c           | PLOT       |          |      |
| dpwr        | 50          | wc         | 250      |      |
| dmf         | 15900       | sc         | 0        |      |
|             |             | vs         | 48       |      |
|             |             | th         | 20       |      |
|             |             | nm         | cdc ph   |      |

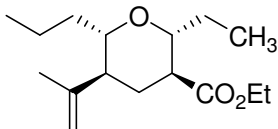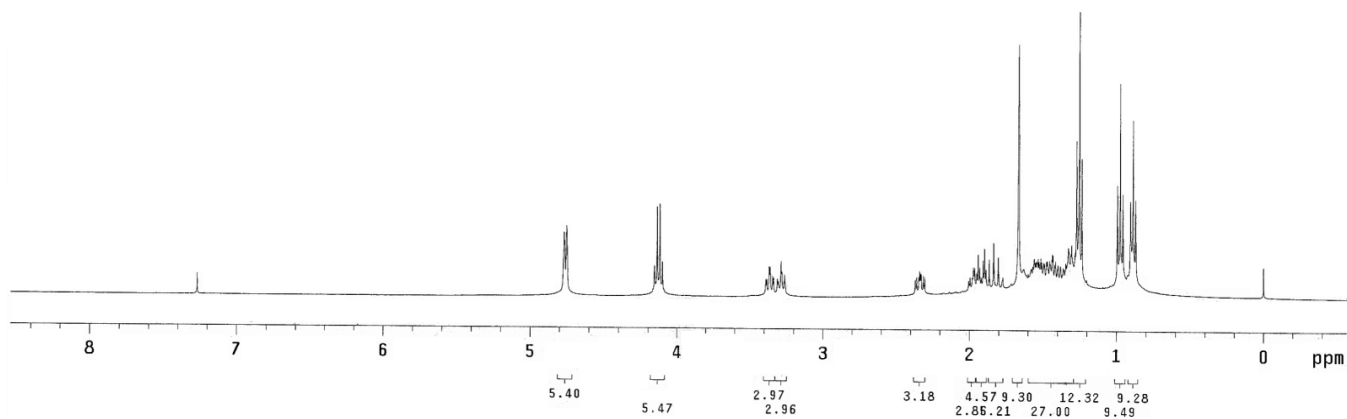

### <sup>13</sup>C NMR spectra of 3n

PS\_463\_U

expl s2pu1

| SAMPLE      |             | SPECIAL    |          |
|-------------|-------------|------------|----------|
| date        | Mar 12 2011 | temp       | not used |
| solvent     | CDCl3       | gain       | not used |
| file        |             | exp        | not used |
| ACQUISITION |             | hst        | 0.008    |
| sw          | 25125.6     | pw90       | 18.600   |
| at          | 1.199       | alfa       | 20.000   |
| np          | 60270       | FLAGS      |          |
| fb          | 13800       | il         | n        |
| bs          | 16          | in         | n        |
| d1          | 1.000       | dp         | y        |
| nt          | 5000        | hs         | nn       |
| ct          | 2272        | PROCESSING |          |
| TRANSMITTER |             | lb         | 2.00     |
| tn          | C13         | fn         | 65536    |
| sfrq        | 100.554     | DISPLAY    |          |
| tof         | 1536.3      | sp         | -414.5   |
| tpwr        | 61          | wp         | 21063.9  |
| pw          | 9.300       | rfl        | 9268.3   |
| DECOUPLER   |             | rfp        | 7764.9   |
| dn          | H1          | rp         | -62.8    |
| dof         | 0           | lp         | -346.1   |
| dm          | yyy         | PLOT       |          |
| dmm         | w           | wc         | 250      |
| dpwr        | 42          | sc         | 0        |
| dmf         | 8900        | vs         | 16       |
|             |             | th         | 5        |
|             |             | nm         | no ph    |

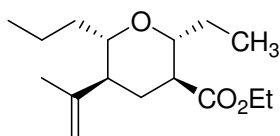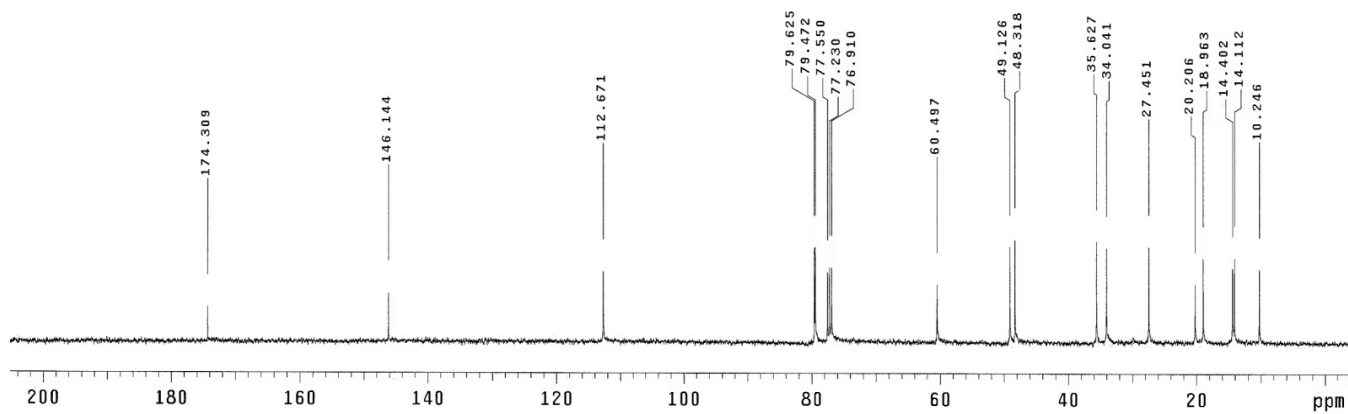

### <sup>1</sup>H NMR spectra of 3o

PS\_469\_U

expl s2pu1

| SAMPLE      |             | SPECIAL    |          |
|-------------|-------------|------------|----------|
| date        | Mar 27 2011 | temp       | not used |
| solvent     | CDCl3       | gain       | not used |
| file        |             | spin       | not used |
| ACQUISITION | exp         | hst        | 0.008    |
| sw          | 6389.8      | pw90       | 19.700   |
| at          | 1.998       | alfa       | 20.000   |
| np          | 25528       | FLAGS      |          |
| fb          | not used    | il         | n        |
| bs          | 8           | in         | n        |
| d1          | 1.000       | dp         | y        |
| nt          | 100         | hs         | nn       |
| ct          | 100         | PROCESSING |          |
| TRANSMITTER | H1          | lb         | 0.10     |
| tn          |             | fn         | 65536    |
| sfrq        | 399.853     | DISPLAY    |          |
| tof         | 362.8       | sp         | -171.0   |
| tpwr        | 57          | wp         | 3568.4   |
| pw          | 9.850       | rfl        | 792.3    |
| DECOUPLER   | C13         | rffp       | 0        |
| dn          | 0           | rp         | 112.2    |
| dof         | 0           | lp         | -82.4    |
| dm          | nnn         | PLOT       |          |
| dmm         | c           | wc         | 250      |
| dpwr        | 50          | sc         | 0        |
| dmf         | 15900       | vs         | 49       |
|             |             | th         | 16       |
|             |             | nm         | cdc ph   |

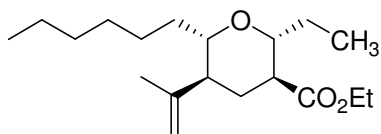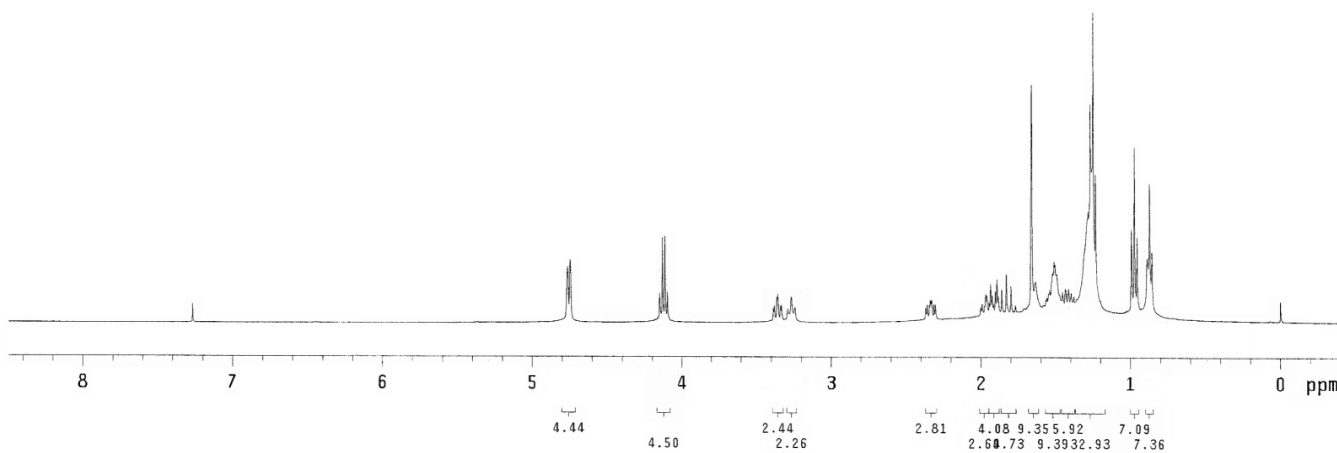

### <sup>13</sup>C NMR spectra of 30

PS\_469\_U

exp1 s2pu1

| SAMPLE      |             | SPECIAL    |          |
|-------------|-------------|------------|----------|
| date        | Mar 27 2011 | temp       | not used |
| solvent     | CDCl3       | gain       | not used |
| file        |             | spin       | not used |
| ACQUISITION |             | hst        | 0.008    |
| sw          | 25125.6     | pw90       | 18.600   |
| at          | 1.199       | alfa       | 20.000   |
| np          | 60270       | FLAGS      |          |
| fb          | 13800       | il         | n        |
| bs          | 16          | in         | n        |
| d1          | 1.000       | dp         | y        |
| nt          | 4000        | hs         | nn       |
| ct          | 880         | PROCESSING |          |
| tn          |             | lb         | 2.00     |
| sfrq        | 100.654     | fn         | 65536    |
| tof         | 1536.3      | DISPLAY    |          |
| tpwr        | 61          | sp         | -515.0   |
| pw          | 9.300       | wp         | 21328.5  |
| DECOUPLER   |             | rfl        | 9269.8   |
|             |             | rfp        | 7764.9   |
| dn          | H1          | rp         | -55.3    |
| dof         | 0           | lp         | -314.1   |
| dm          | yyy         | PLOT       |          |
| dmm         | w           | wc         | 250      |
| dpwr        | 42          | sc         | 0        |
| dmf         | 8900        | vs         | 16       |
|             |             | th         |          |
|             |             | nm         | no ph 2  |

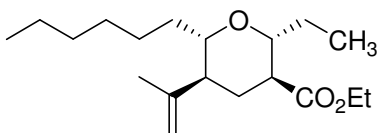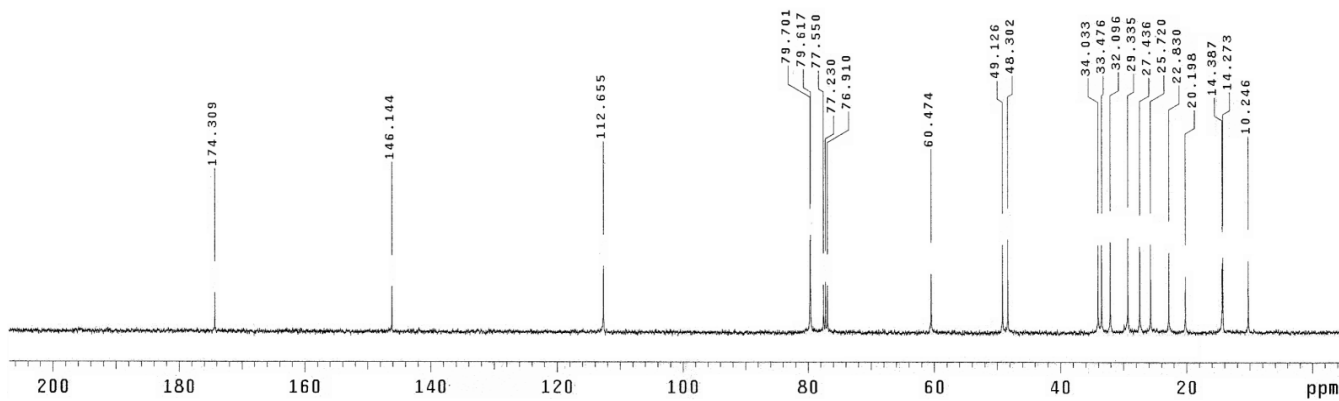



### <sup>1</sup>H NMR spectra of 3p

PS\_467\_U

exp1 s2pu1

```
SAMPLE          SPECIAL
date Mar 22 2011 temp not used
solvent CDC13 gain not used
file /export/home/~ spin not used
ciftemp/AKS_PS_467~ hst 0.008
                U.fid pw90 19.700
ACQUISITION     alfa 20.000
sw 6389.8        FLAGS
at 1.998         il n
np 25528         in n
fb not used     dp y
bs 8             hs nn
d1 1.000         PROCESSING
nt 100           lb 0.10
ct 100           fn 65536
TRANSMITTER      DISPLAY
tn H1            sp -196.0
sfrq 399.853     wp 3593.6
tof 362.8        rfl 792.1
tpwr 57          rfp 0
pw 9.850         rp 109.1
DECOUPLER        lp -84.0
dn C13           PLOT
dof 0            wc 250
dm nnn          sc 0
dmm c           vs 38
dpwr 50         th 20
dmf 15900       nm cdc ph
```

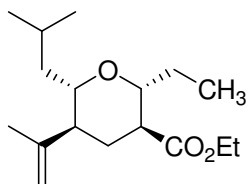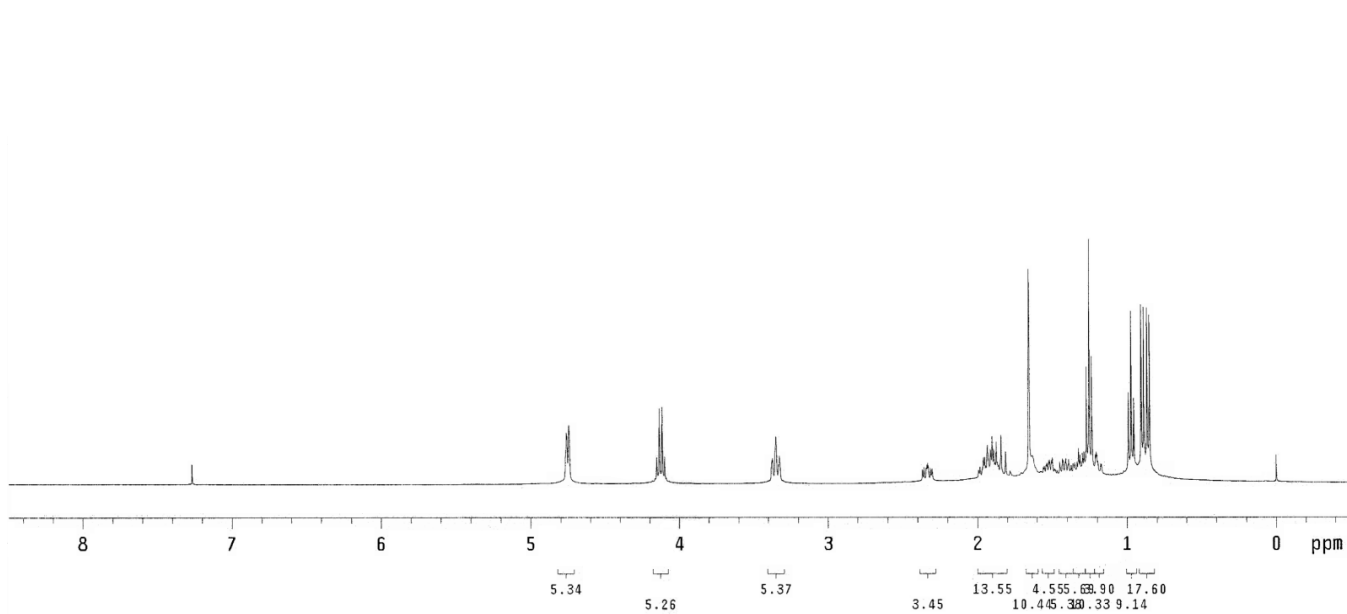

### <sup>13</sup>C NMR spectra of 3p

PS\_467\_U

exp1 s2pu1

| SAMPLE      |             | SPECIAL    |          |
|-------------|-------------|------------|----------|
| date        | Mar 23 2011 | temp       | not used |
| solvent     | CDC13       | gain       | not used |
| file        | exp         | spin       | not used |
| ACQUISITION |             | hst        | 0.008    |
| sw          | 25125.6     | pw90       | 18.600   |
| at          | 1.199       | alfa       | 20.000   |
| np          | 60270       | FLAGS      |          |
| fb          | 13800       | il         | n        |
| bs          | 16          | in         | n        |
| d1          | 1.000       | dp         | y        |
| nt          | 8000        | hs         | nn       |
| ct          | 1552        | PROCESSING |          |
| TRANSMITTER |             | lb         | 2.00     |
| tn          | C13         | fn         | 65536    |
| sfrq        |             | DISPLAY    |          |
| tof         | 100.554     | sp         | -579.4   |
| tpwr        | 1536.3      | wp         | 21427.4  |
| pw          | 61          | rf1        | 9268.3   |
| DECOUPLER   |             | rfl        | 7764.9   |
| dn          | H1          | rp         | -49.4    |
| dof         | 0           | lp         | -298.6   |
| dm          | yy          | PLOT       |          |
| dmm         | w           | wc         | 250      |
| dpwr        | 42          | sc         | 0        |
| dmf         | 8900        | vs         | 20       |
|             |             | th         | 3        |
|             |             | nm         | no ph    |

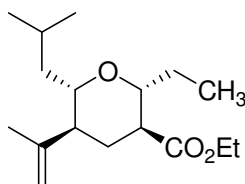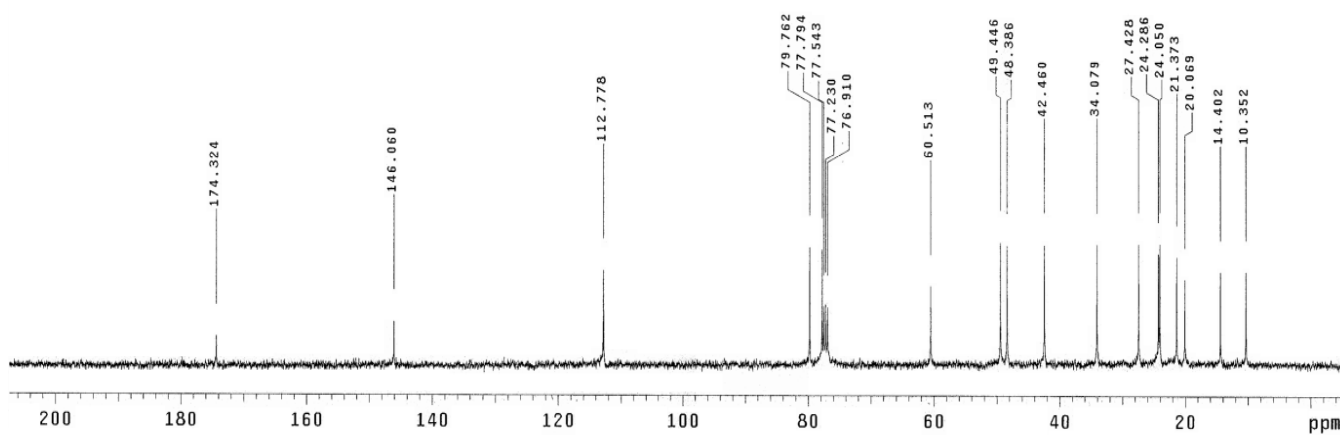

### <sup>1</sup>H NMR spectra of 4a

PS\_425\_M

expl s2pu1

| SAMPLE      |                | SPECIAL    |          |
|-------------|----------------|------------|----------|
| date        | Jan 7 2011     | temp       | not used |
| solvent     | CDCl3          | gain       | not used |
| file        | /export/home/~ | spin       | not used |
| ciftemp     | AKS_PS_425~    | hst        | 0.008    |
|             | _M.fid         | pw90       | 19.700   |
|             |                | alfa       | 20.000   |
| ACQUISITION |                | FLAGS      |          |
| sw          | 6389.8         |            |          |
| at          | 1.998          | il         | n        |
| np          | 25528          | in         | n        |
| fb          | not used       | dp         | y        |
| bs          | 8              | hs         | nn       |
| di          | 1.000          | PROCESSING |          |
| nt          | 100            | lb         | 0.10     |
| ct          | 100            | fn         | 65536    |
| TRANSMITTER |                | DISPLAY    |          |
| tn          | H1             | sp         | -193.8   |
| sfrq        | 399.853        | wp         | 3585.2   |
| tof         | 362.8          | rfl        | 798.4    |
| tpwr        | 57             | rfp        | 0        |
| pw          | 9.850          | rp         | 118.5    |
|             |                | lp         | -98.5    |
| DECOUPLER   |                | PLOT       |          |
| dn          | C13            |            |          |
| dof         | 0              | wc         | 250      |
| dm          | nnn            | sc         | 0        |
| dmm         | c              | vs         | 43       |
| dpwr        | 50             | th         | 31       |
| dmf         | 15900          | nm         | cdc ph   |

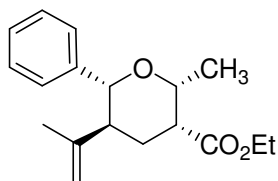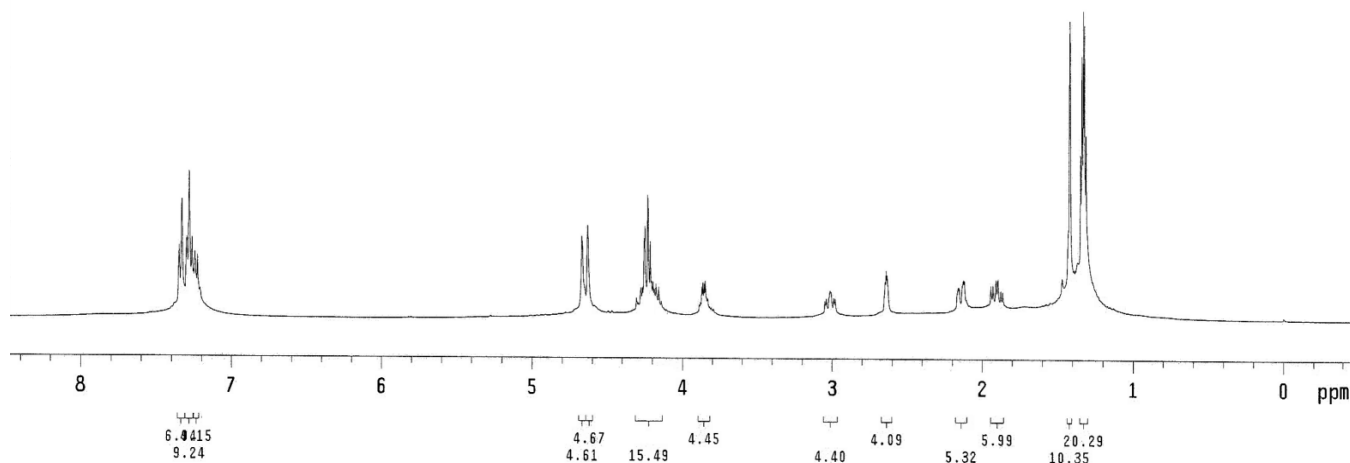

### <sup>13</sup>C NMR spectra of 4a

PS\_425\_M

exp1 s2pu1

| SAMPLE      |                | SPECIAL    |          |
|-------------|----------------|------------|----------|
| date        | Jan 7 2011     | temp       | not used |
| solvent     | CDCl3          | gain       | not used |
| file        | /export/home/~ | spin       | not used |
| ciftemp     | AKS_PS_425~    | hst        | 0.008    |
|             | M_C13_fid      | pw90       | 18.600   |
|             |                | alfa       | 20.000   |
| ACQUISITION |                | FLAGS      |          |
| sw          | 25125.6        |            |          |
| at          | 1.199          | il         | n        |
| np          | 60270          | in         | n        |
| fb          | 13800          | dp         | y        |
| bs          | 16             | hs         | nn       |
| d1          | 1.000          | PROCESSING |          |
| nt          | 4000           | lb         | 2.00     |
| ct          | 1152           | fn         | 65536    |
| TRANSMITTER |                | DISPLAY    |          |
| tn          | C13            | sp         | -420.7   |
| sfrq        | 100.554        | wp         | 21361.4  |
| tof         | 1536.3         | rfl        | 9274.4   |
| tpwr        | 61             | rffp       | 7764.9   |
| pw          | 9.300          | rp         | -48.1    |
|             |                | lp         | -335.6   |
| DECOUPLER   |                | PLOT       |          |
| dn          | H1             |            |          |
| dof         | 0              | wc         | 250      |
| dm          | vyv            | sc         | 0        |
| dmm         | w              | vs         | 33       |
| dpwr        | 42             | th         | 3        |
| dmf         | 8900           | nm         | no ph    |

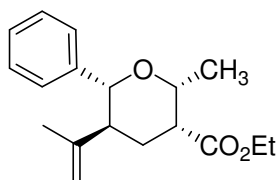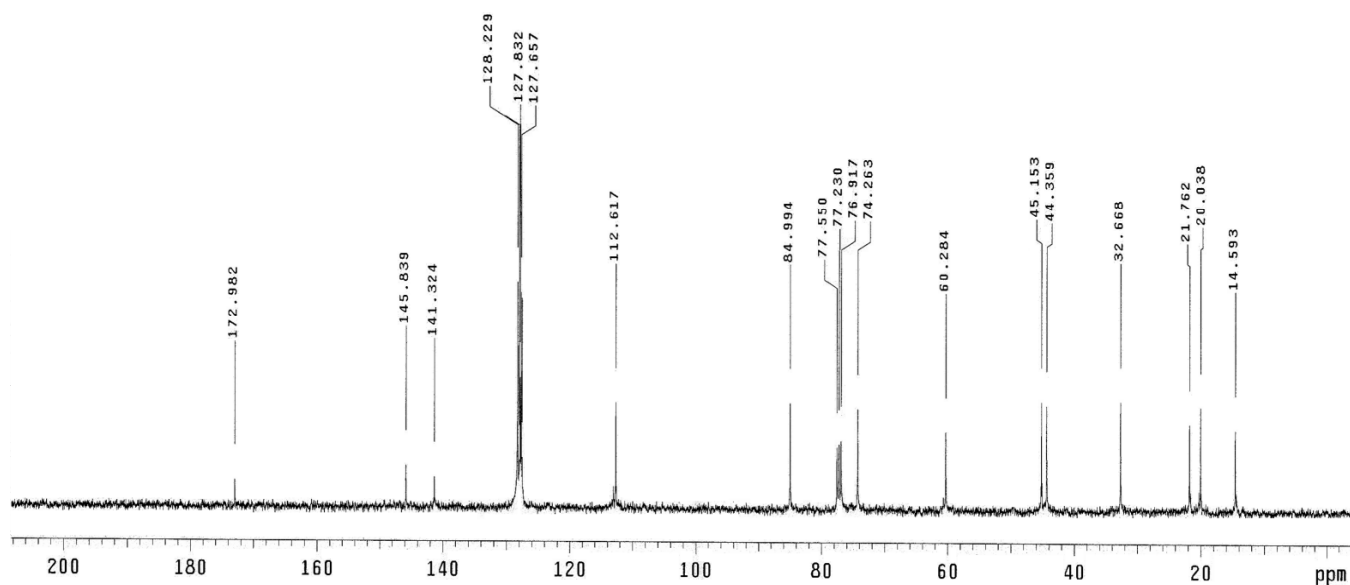

### <sup>1</sup>H NMR spectra of 4b

PS\_343\_μM

exp1 s2pu1

| SAMPLE      |                | SPECIAL    |          |
|-------------|----------------|------------|----------|
| date        | Sep 2 2010     | temp       | not used |
| solvent     | CDCl3          | gain       | not used |
| file        | /export/home/~ | spin       | not used |
| guest123/   | AKS_PS_34~     | hst        | 0.008    |
|             | 3_M.fid        | pw90       | 19.700   |
|             |                | alfa       | 20.000   |
| ACQUISITION |                | FLAGS      |          |
| sw          | 6389.8         |            |          |
| at          | 1.998          | il         | n        |
| np          | 25528          | in         | n        |
| fb          | not used       | dp         | y        |
| bs          | 4              | hs         | nn       |
| d1          | 1.000          | PROCESSING |          |
| nt          | 32             | lb         | 0.10     |
| ct          | 32             | fn         | 65536    |
| TRANSMITTER |                | DISPLAY    |          |
| tn          | H1             | sp         | -166.3   |
| sfrq        | 399.853        | wp         | 3560.0   |
| tof         | 362.8          | rfl        | 796.0    |
| tpwr        | 57             | rfp        | 0        |
| pw          | 9.850          | rp         | 133.1    |
|             |                | lp         | -95.1    |
| DECOUPLER   |                | PLOT       |          |
| dn          | C13            |            |          |
| dof         | 0              | wc         | 250      |
| dm          | nnn            | sc         | 0        |
| dmm         | c              | vs         | 44       |
| dpwr        | 50             | th         | 37       |
| dmf         | 15900          | nm         | cdc ph   |

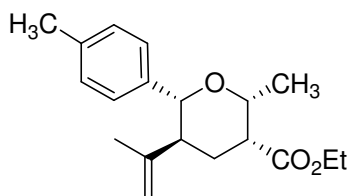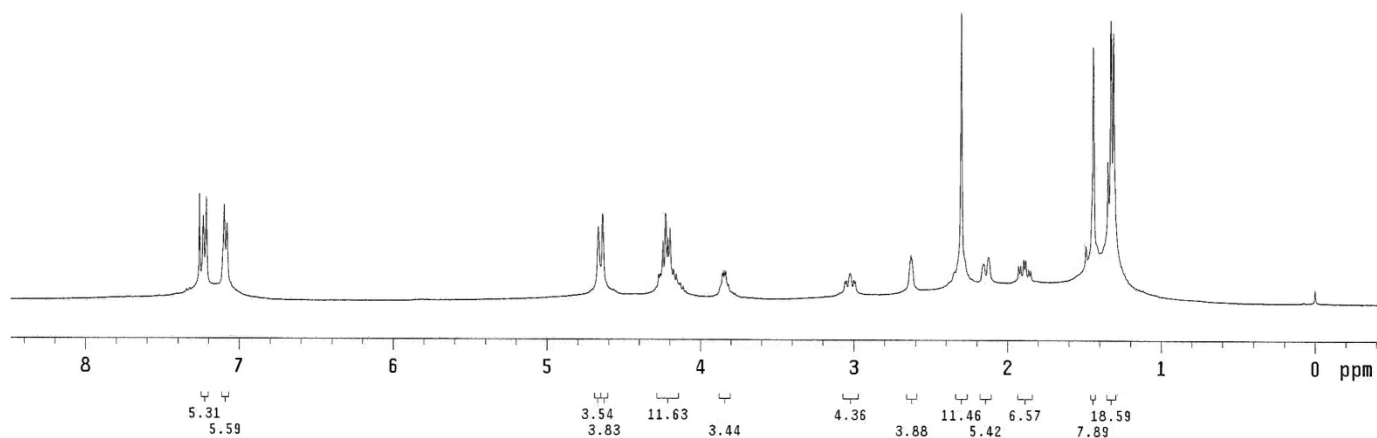

### <sup>13</sup>C NMR spectra of 4b

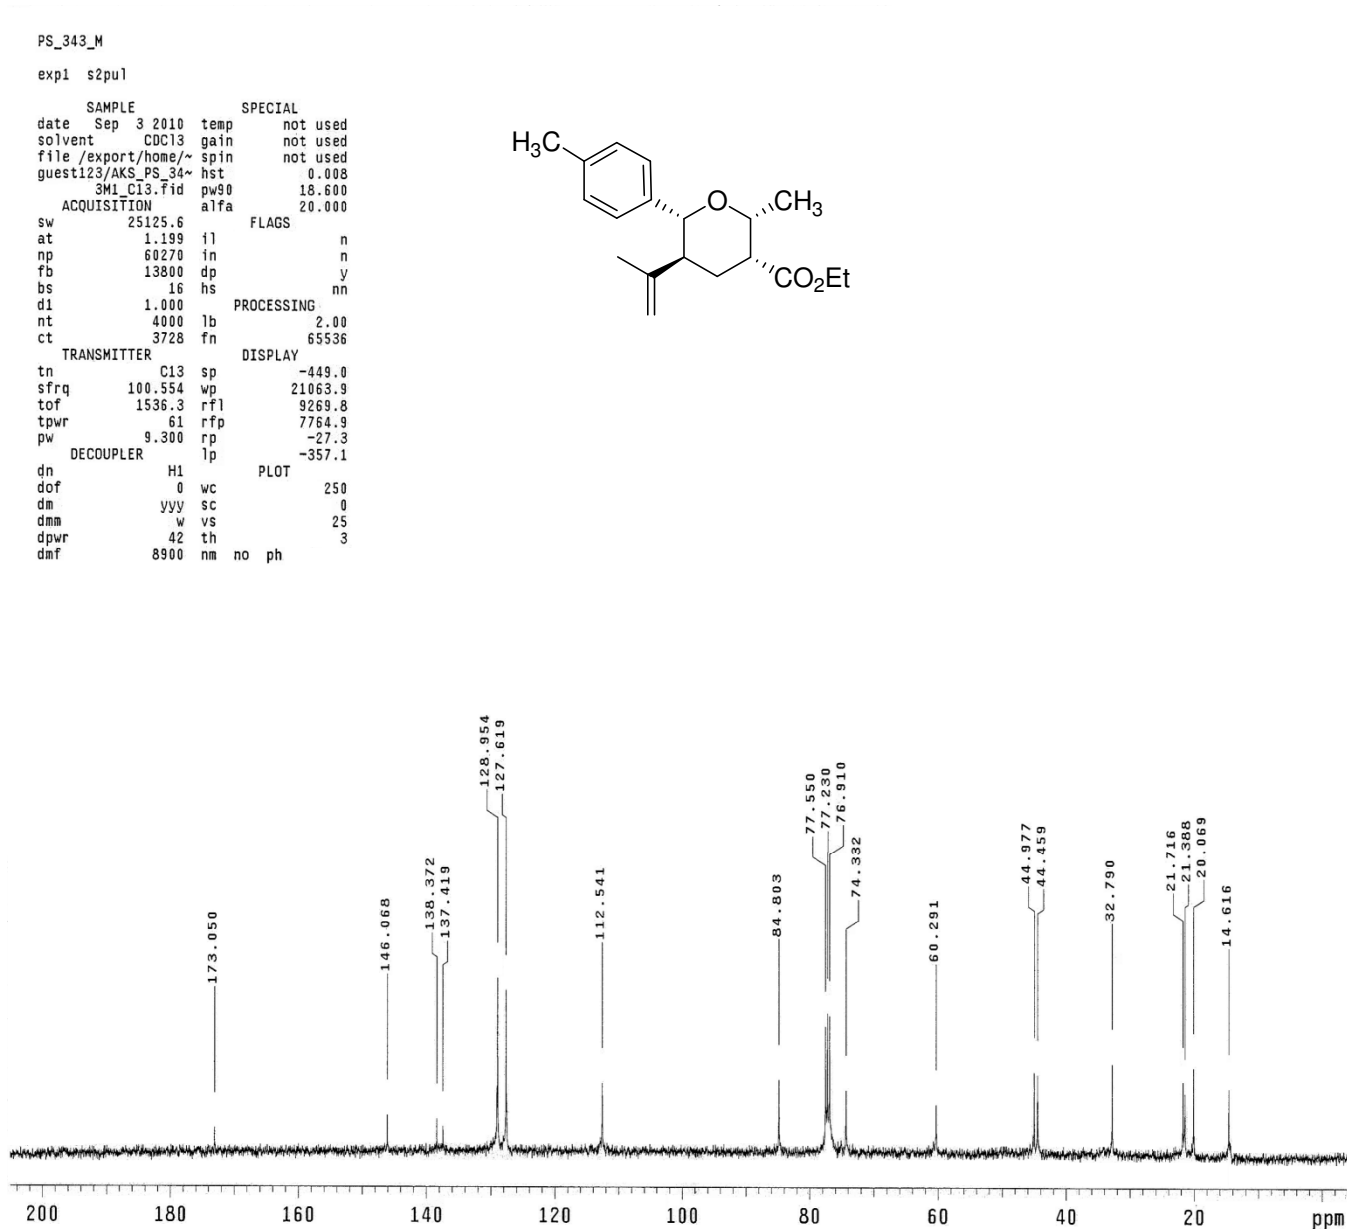

### $^1\text{H}$ NMR spectra of 4c

PS\_341M

exp1 s2pu1

| SAMPLE      |                | SPECIAL    |          |
|-------------|----------------|------------|----------|
| date        | Jan 18 2011    | temp       | not used |
| solvent     | CDC13          | gain       | not used |
| file        | /export/home/~ | spin       | not used |
| ciftemp     | AKS_PS_341~    | hst        | 0.008    |
|             | M.fid          | pw90       | 19.700   |
|             | alfa           | alfa       | 20.000   |
| ACQUISITION |                | FLAGS      |          |
| sw          | 6389.8         | il         | n        |
| at          | 1.998          | in         | n        |
| np          | 25528          | dp         | y        |
| fb          | not used       | hs         | nn       |
| bs          | 8              |            |          |
| d1          | 1.000          | PROCESSING |          |
| nt          | 100            | fb         | 0.10     |
| ct          | 100            | fn         | 65536    |
| TRANSMITTER |                | DISPLAY    |          |
| tn          | H1             | sp         | -104.5   |
| sfrq        | 399.853        | wp         | 3392.1   |
| tof         | 362.8          | rfl        | 792.9    |
| tpwr        | 57             | rffp       | 0        |
| pw          | 9.850          | rp         | 99.8     |
|             | lpc            | lpc        | -80.9    |
| DECOUPLER   |                | PLOT       |          |
| dn          | C13            | wc         | 250      |
| dof         | 0              | sc         | 0        |
| dm          | nnn            | vs         | 57       |
| dmm         | c              | th         | 20       |
| dpwr        | 50             | cdc        | ph       |
| dmf         | 15900          |            |          |

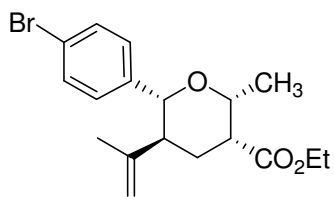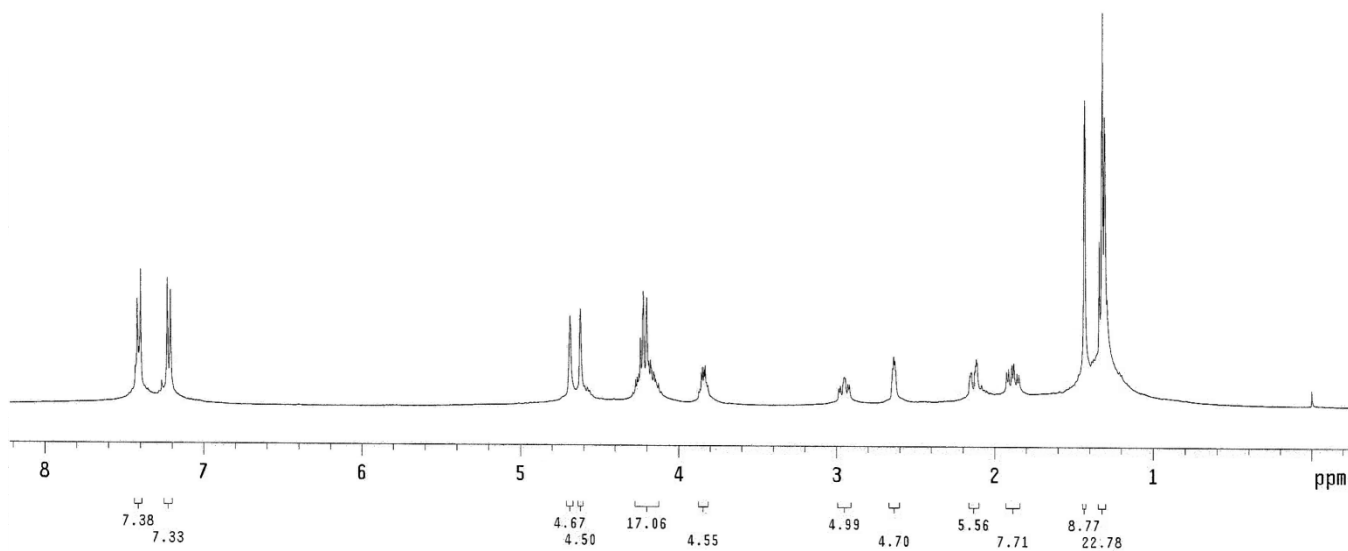

### <sup>13</sup>C NMR spectra of 4c

PS\_341\_M

expl s2pu1

| SAMPLE      |            | SPECIAL    |          |
|-------------|------------|------------|----------|
| date        | Sep 2 2010 | temp       | not used |
| solvent     | CDC13      | gain       | not used |
| file        |            | exp        | not used |
| ACQUISITION |            | hst        | 0.008    |
| sw          | 25125.6    | pw90       | 18.600   |
| at          | 1.199      | alfa       | 20.000   |
| np          | 60270      | FLAGS      |          |
| fb          | 13800      | il         | n        |
| bs          | 16         | in         | n        |
| d1          | 1.000      | dp         | y        |
| nt          | 4000       | hs         | nn       |
| ct          | 2736       | PROCESSING |          |
| TRANSMITTER |            | lb         | 2.00     |
| tn          | C13        | fn         | 65536    |
| sfrq        | 100.554    | DISPLAY    |          |
| tof         | 1536.3     | sp         | -586.3   |
| tpwr        | 61         | wp         | 21323.9  |
| pw          | 9.300      | rf1        | 9270.6   |
| DECOUPLER   |            | rfp        | 7764.9   |
| dn          | H1         | rp         | -40.7    |
| dof         | 0          | lp         | -332.0   |
| dm          | yyy        | PLOT       |          |
| dmm         | w          | wc         | 250      |
| dpwr        | 42         | sc         | 0        |
| dmf         | 8900       | vs         | 30       |
|             |            | th         | 3        |
|             |            | nm         | no ph    |

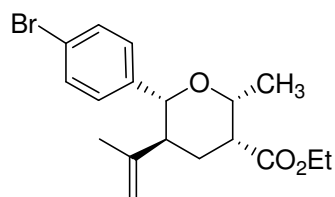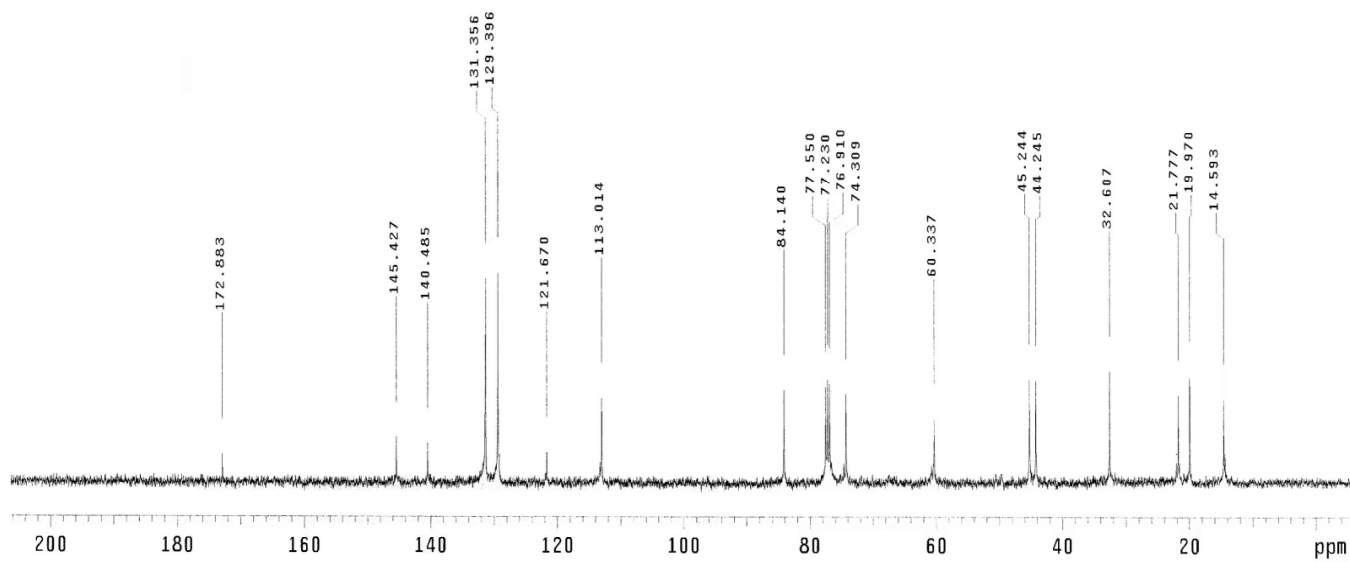



### <sup>1</sup>H NMR spectra of 4d

PS\_395\_M

exp1 s2pu1

| SAMPLE      |                | SPECIAL    |          |
|-------------|----------------|------------|----------|
| date        | Feb 4 2011     | temp       | not used |
| solvent     | CDCl3          | gain       | not used |
| file        | /export/home/~ | spin       | not used |
| ciftemp/    | AKS_PS_395~    | hst        | 0.008    |
|             | M1.fid         | pw90       | 19.700   |
| ACQUISITION | alfa           |            | 20.000   |
| sw          | 6389.8         | FLAGS      |          |
| at          | 1.998          | il         | n        |
| np          | 25528          | in         | n        |
| fb          | not used       | dp         | y        |
| bs          | 4              | hs         | nn       |
| d1          | 1.000          | PROCESSING |          |
| nt          | 32             | lb         | 0.10     |
| ct          | 32             | fn         | 65536    |
| TRANSMITTER | H1             | DISPLAY    |          |
| tn          |                | sp         | -208.5   |
| sfrq        | 399.853        | wp         | 3593.6   |
| tof         | 362.8          | rfl        | 796.2    |
| tpwr        | 57             | rfp        | 0        |
| pw          | 9.850          | rp         | 113.0    |
| DECOUPLER   | lp             |            | -103.1   |
| dn          | C13            | PLOT       |          |
| dof         | 0              | wc         | 250      |
| dm          | nnn            | sc         | 0        |
| dmm         | c              | vs         | 56       |
| dpwr        | 50             | th         | 36       |
| dmf         | 15900          | nm         | cdc ph   |

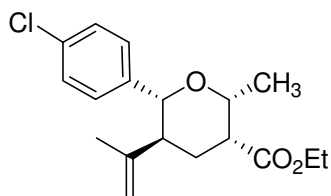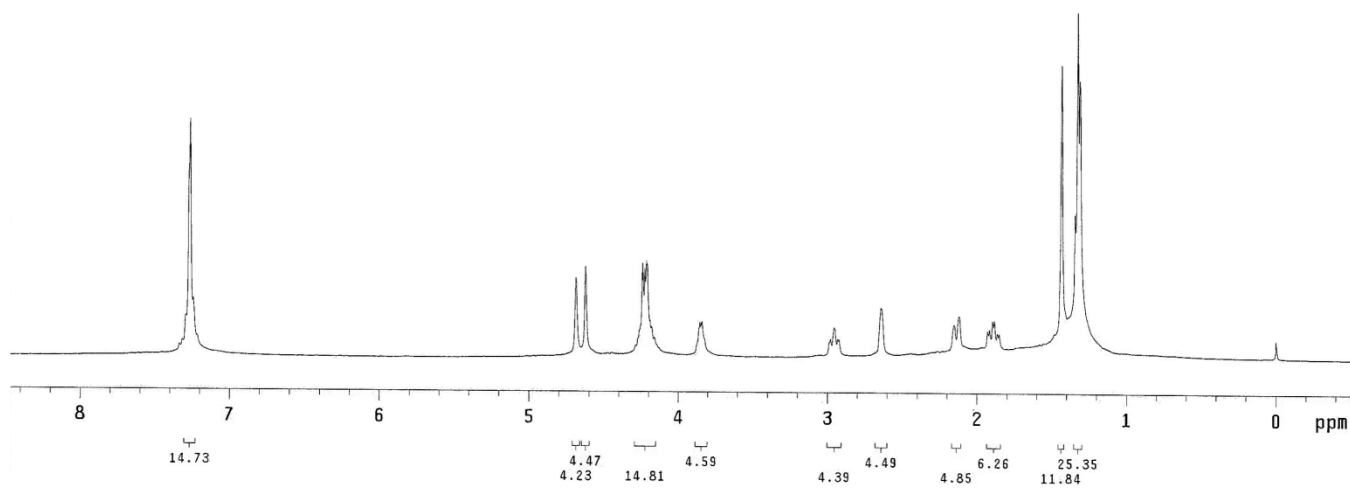

### <sup>13</sup>C NMR spectra of 4d

```
PS_395_M
exp1 s2pu1
SAMPLE
date Nov 30 2010 temp not used
solvent CDCl3 gain not used
file /export/home/~ spin not used
ciftemp/AKS_PS_395~ hst 0.008
M_C13.fid pw90 18.600
ACQUISITION alfa 20.000
sw 25125.6 FLAGS
at 1.199 il n
np 60270 in n
fb 13800 dp y
bs 16 hs nn
d1 1.000 PROCESSING
nt 4000 lb 2.00
ct 1600 fn 65536
TRANSMITTER DISPLAY
tn C13 sp -582.4
sfrq 100.554 wp 21328.5
tof 1536.3 rfl 9271.3
tpwr 61 rfp 7764.9
pw 9.300 rp -28.0
DECOUPLER lp -367.4
dn H1 PLOT
dof 0 wc 250
dm yyv sc 0
dmm w vs 40
dpwr 42 th
dmf 8900 nm no ph 4
```

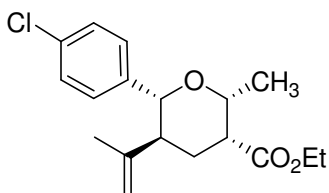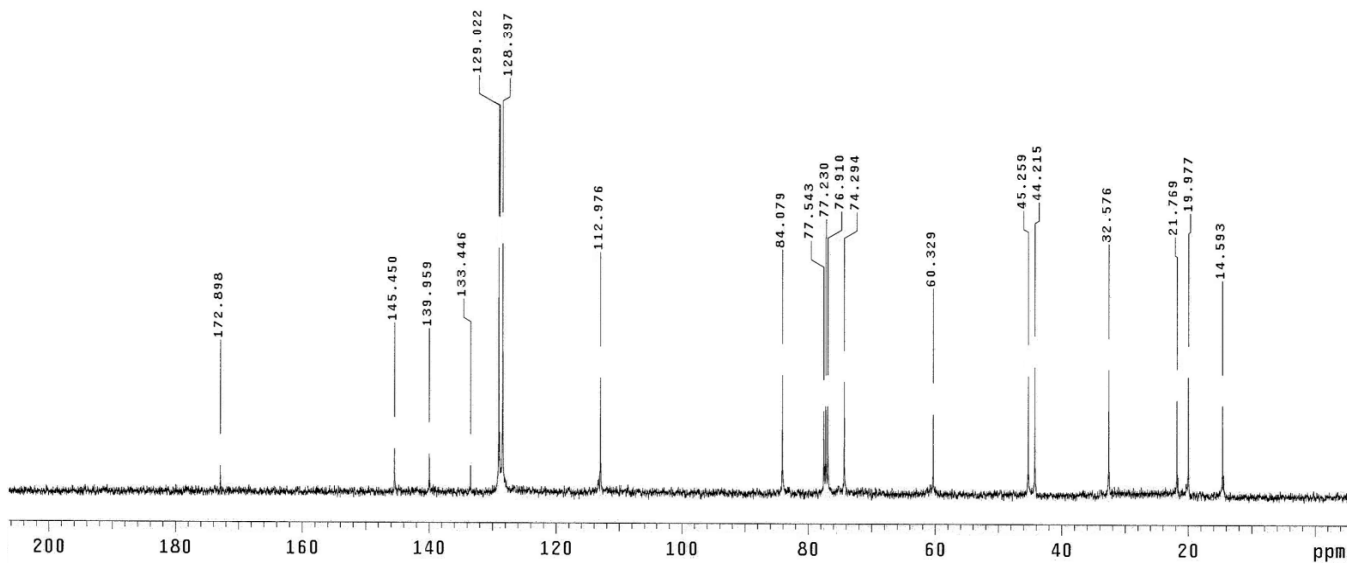

### <sup>1</sup>H NMR spectra of 4e

```
PS_4529_M
exp1 s2pu1
SAMPLE
date Jan 11 2011 temp not used
solvent CDCl3 gain not used
file /export/home/~ spin not used
ciftemp/AKS_PS_429~ hst 0.008
M.fid pw90 19.700
ACQUISITION alfa 20.000
sw 6389.8 FLAGS
at 1.998 il n
np 25528 in n
fb not used dp y
bs 8 hs nn
d1 1.000 PROCESSING
nt 200 lb 0.10
ct 200 fn 65536
TRANSMITTER H1 sp DISPLAY
tn 399.853 wp -154.6
sfrq 362.8 rfl 3493.0
tpwr 57 rfp 792.7
pw 9.850 rp 0
DECOUPLER lp 119.3
dn C13 PLOT
dof 0 wc 250
dm nnn sc 0
dmm c vs 49
dpwr 50 th 39
dmf 15900 nm cdc ph
```

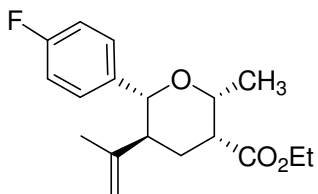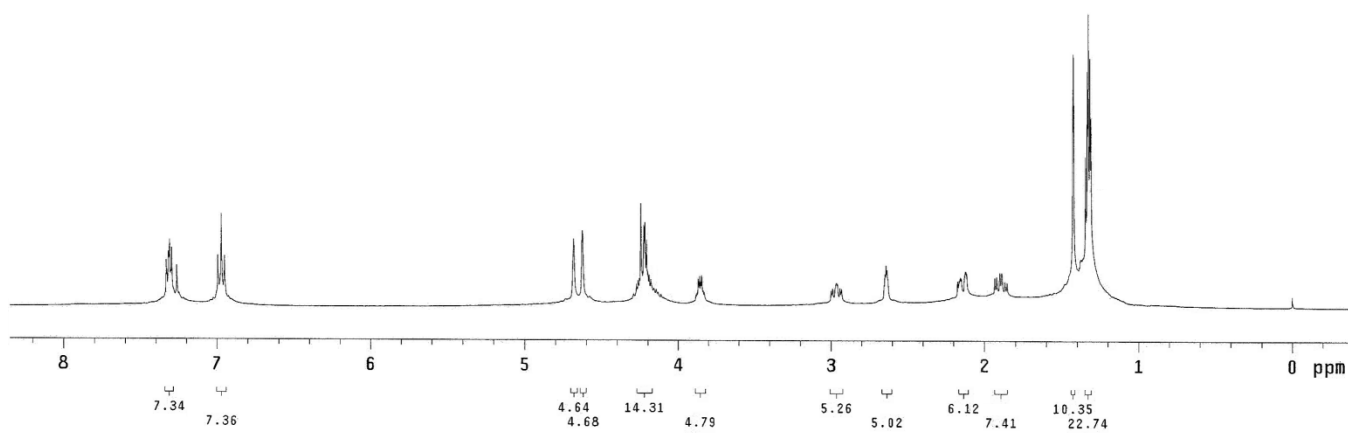

### <sup>13</sup>C NMR spectra of 4e

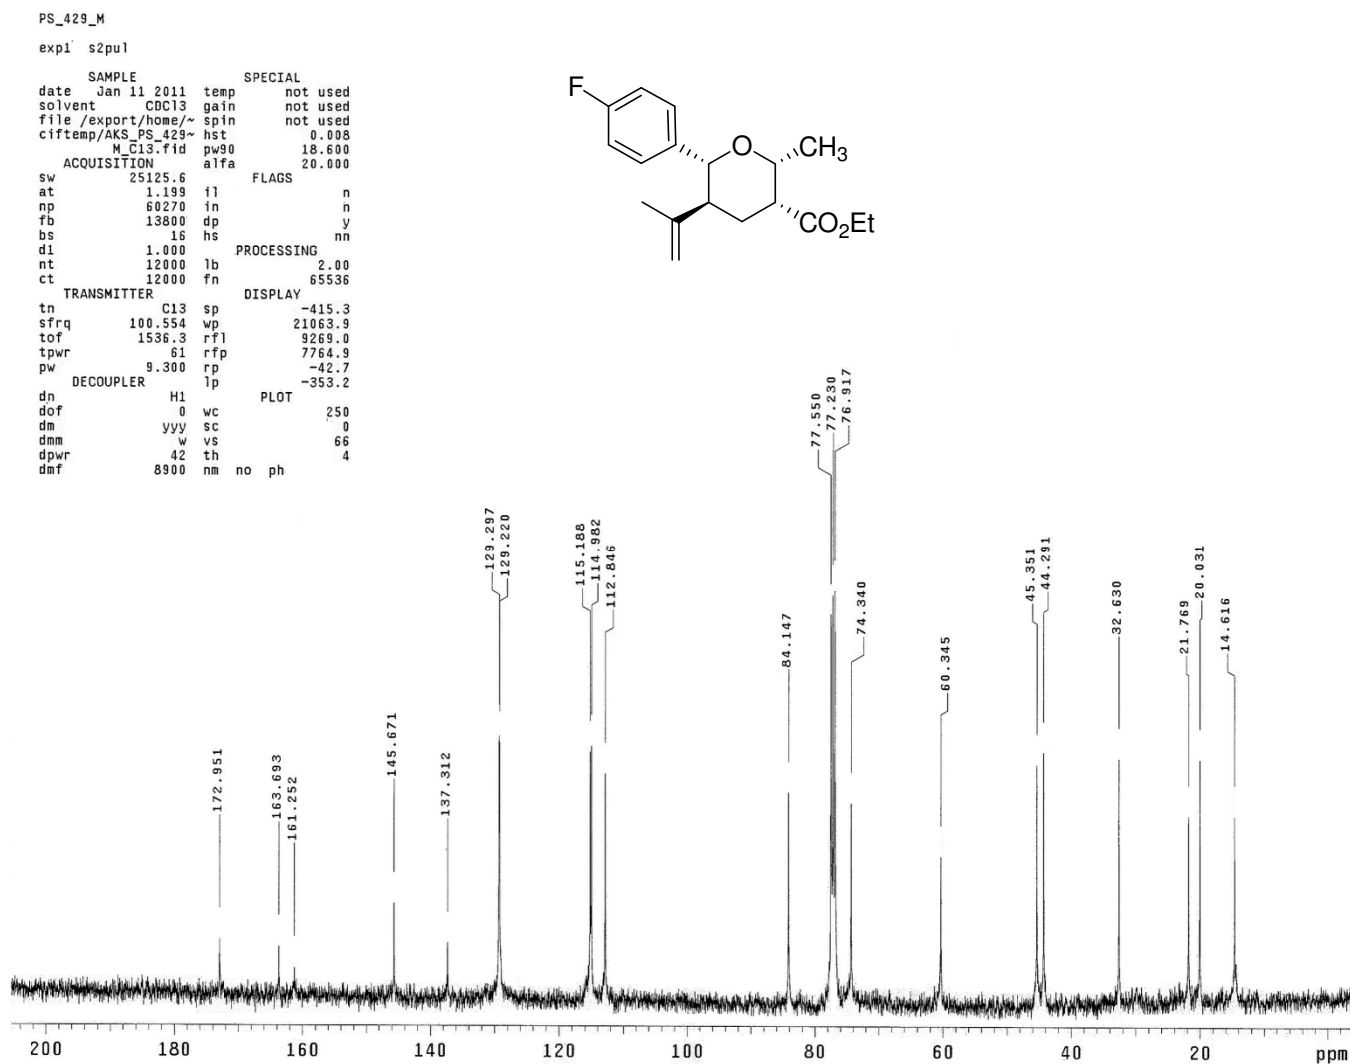

### <sup>19</sup>F NMR spectra of 4e

PS\_429\_M

exp1 s2pu1

| SAMPLE         |                | SPECIAL    |          |
|----------------|----------------|------------|----------|
| date           | Jan 11 2011    | temp       | not used |
| solvent        | CDCl3          | gain       | not used |
| file           | /export/home/~ | spin       | not used |
| ciftemp        | AKS_PS_429~    | hst        | 0.008    |
| M_Fluorine.fid |                | pw90       | 15.600   |
| ACQUISITION    | alfa           |            | 90.000   |
| sw             | 100000.0       | FLAGS      |          |
| at             | 0.600          | il         | n        |
| np             | 119936         | in         | n        |
| fb             | 55000          | dp         | y        |
| bs             | 16             | hs         | nn       |
| d1             | 1.500          | PROCESSING |          |
| nt             | 64             | lb         | 0.30     |
| ct             | 64             | lsfid      | -10      |
| TRANSMITTER    |                | fn         | not used |
| tn             | F19            | DISPLAY    |          |
| sfrq           | 376.236        | sp         | -89016.6 |
| tof            | 40099.4        | wp         | 100000.0 |
| tpwr           | 58             | rfl        | 89016.6  |
| pw             | 5.200          | rfp        | 0        |
| DECOUPLER      |                | rp         | -124.8   |
| dn             | H1             | lp         | 22.3     |
| dof            | 0              | PLOT       |          |
| dm             | nm             | wc         | 250      |
| dmm            | c              | sc         | 0        |
| dpwr           | 42             | vs         | 29       |
| dmf            | 8900           | th         | 10       |
|                | ai             | no         | ph       |

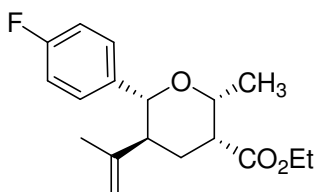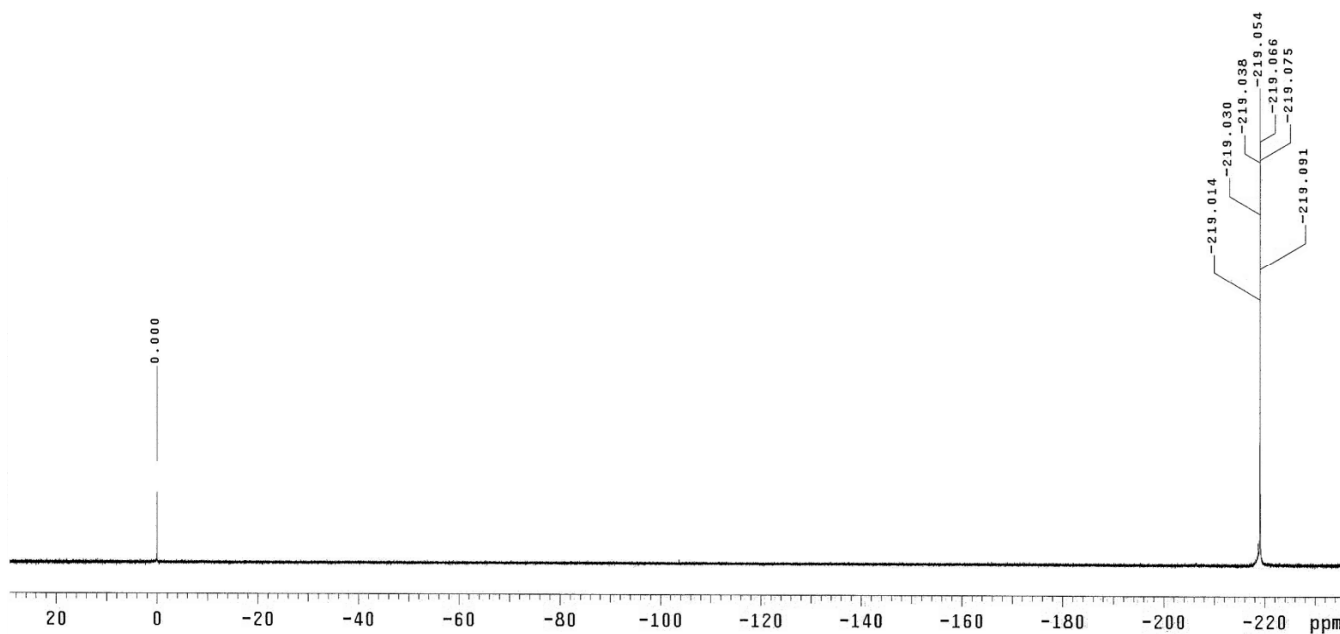

## $^1\text{H}$ NMR spectra of 4f

```
PS_391_M
expl std1h
SAMPLE
date Nov 16 2010 temp not used
solvent CDCl3 gain not used
file /export/home/~ spin not used
ciftemp/AKS_PS_391~ hst 0.008
_M.fid pw90 19.700
ACQUISITION alfa 20.000
sw 6006.0 FLAGS
at 1.995 il n
np 23964 in n
fb not used dp y
bs 16 hs nn
dl 1.000
nt 200 fn PROCESSING not used
ct 128 DISPLAY
TRANSMITTER sp -156.2
tn H1 wp 3551.3
sfrq 399.853 rfl 963.8
tof 0 rfp 0
tpwr 57 rp 116.5
pw 7.000 lp -88.5
DECOUPLER C13 wc PLOT 250
dof 0 sc 0
dm nnn vs 46
dmm c th 30
dpwr 50 nm cdc ph
dmf 15900
```

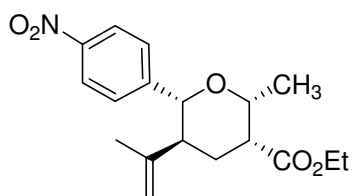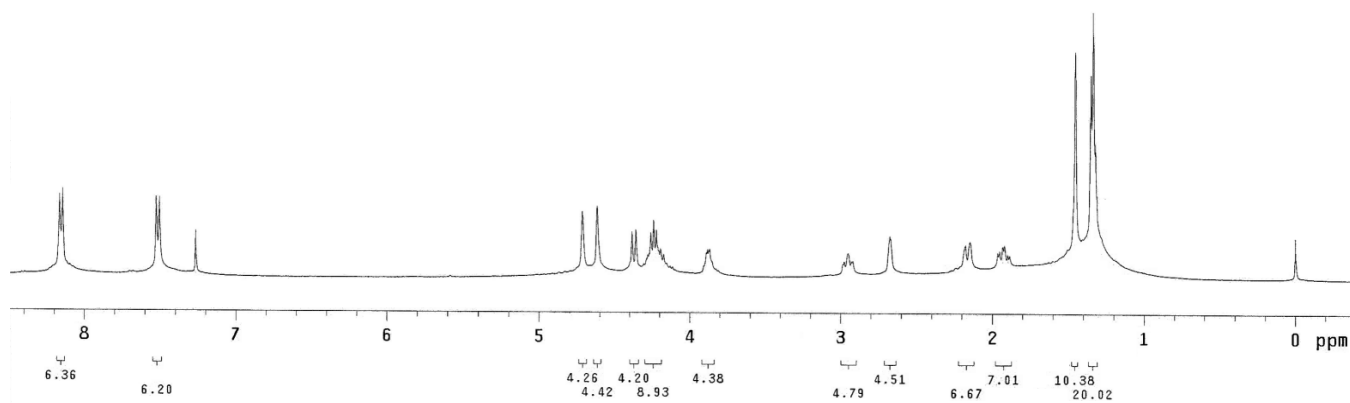

### <sup>13</sup>C NMR spectra of 4f

PS\_340\_M

exp1 s2pu1

|                     |                |            |          |
|---------------------|----------------|------------|----------|
| SAMPLE              |                | SPECIAL    |          |
| date                | Aug 26 2010    | temp       | not used |
| solvent             | CDCl3          | gain       | not used |
| file                | /export/home/~ | spin       | not used |
| guest123/AKS_PS_34~ |                | hst        | 0.008    |
| 0M_C13.fid          |                | pw90       | 18.600   |
| ACQUISITION         |                | alfa       | 20.000   |
| sw                  | 25125.6        | FLAGS      |          |
| at                  | 1.199          | il         | n        |
| np                  | 60270          | in         | n        |
| fb                  | 13800          | dp         | y        |
| bs                  | 16             | hs         | nn       |
| d1                  | 1.000          | PROCESSING |          |
| nt                  | 5000           | lb         | 2.00     |
| ct                  | 3616           | fn         | 65536    |
| TRANSMITTER         |                | DISPLAY    |          |
| tn                  | C13            | sp         | -448.3   |
| sfrq                | 100.554        | wp         | 20866.1  |
| tof                 | 1536.3         | rfl        | 9269.0   |
| tpwr                | 61             | rfp        | 7764.9   |
| pw                  | 9.300          | rp         | -31.3    |
| DECOUPLER           |                | lp         | -373.0   |
| dn                  | H1             | PLOT       |          |
| dof                 | 0              | wc         | 250      |
| dm                  | yyy            | sc         | 0        |
| dmm                 | w              | vs         | 51       |
| dpwr                | 42             | th         | 3        |
| dmf                 | 8900           | nm         | no ph    |

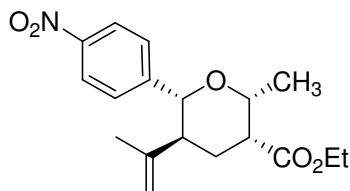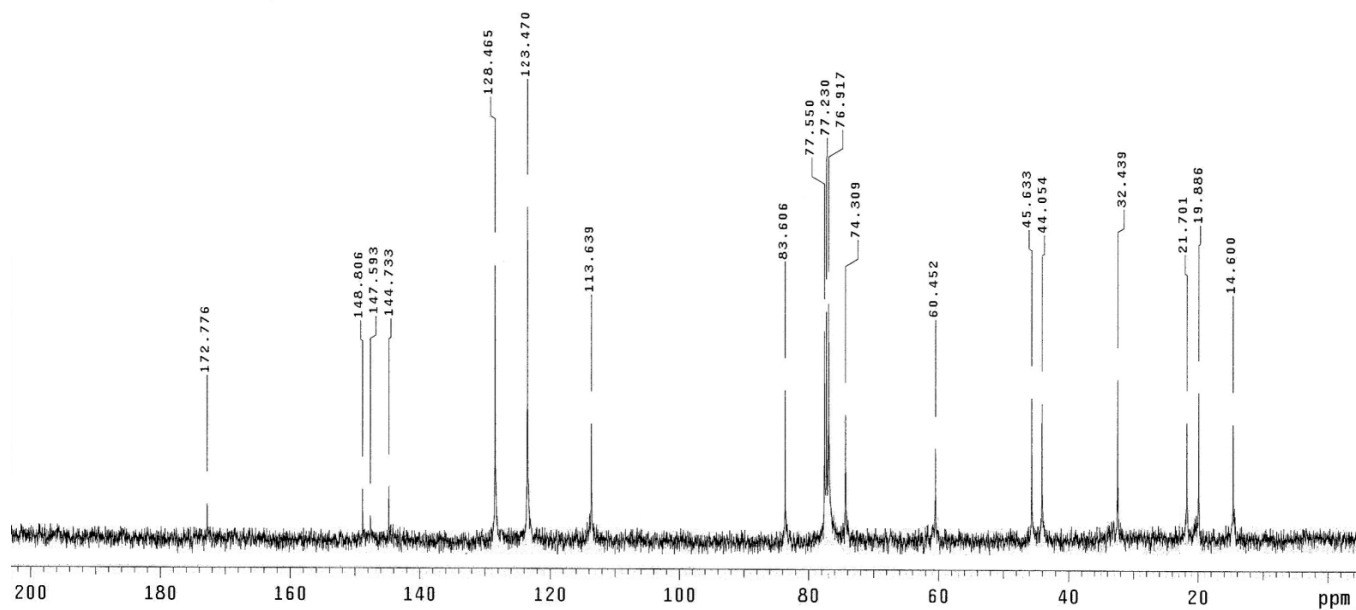

### <sup>1</sup>H NMR spectra of 4g

PS\_338M

expl s2pu1

|                     |                |            |          |
|---------------------|----------------|------------|----------|
| SAMPLE              |                | SPECIAL    |          |
| date                | Feb 3 2011     | temp       | not used |
| solvent             | CDCl3          | gain       | not used |
| file                | /export/home/~ | spin       | not used |
| ciftemp/AKS_PS_338- | hst            |            | 0.008    |
|                     | M.fid          | pw90       | 19.700   |
|                     | alfa           |            | 20.000   |
| ACQUISITION         |                | FLAGS      |          |
| sw                  | 6389.8         |            |          |
| at                  | 1.998          | il         | n        |
| np                  | 25528          | in         | n        |
| fb                  | not used       | dp         | y        |
| bs                  | 8              | hs         | nn       |
| d1                  | 1.000          | PROCESSING |          |
| nt                  | 100            | lb         | 0.10     |
| ct                  | 88             | fn         | 65536    |
| TRANSMITTER         |                | DISPLAY    |          |
| tn                  | H1             | sp         | -169.1   |
| sfrq                | 399.853        | wp         | 3560.0   |
| tof                 | 362.8          | rfl        | 790.4    |
| tpwr                | 57             | rfp        | 0        |
| pw                  | 9.850          | rp         | 107.7    |
|                     |                | lp         | -91.4    |
| DECOUPLER           |                | PLOT       |          |
| dn                  | C13            |            |          |
| dof                 | 0              | wc         | 250      |
| dm                  | nnn            | sc         | 0        |
| dmm                 | c              | vs         | 98       |
| dpwr                | 50             | th         | 20       |
| dmf                 | 15900          | nm         | cdc ph   |

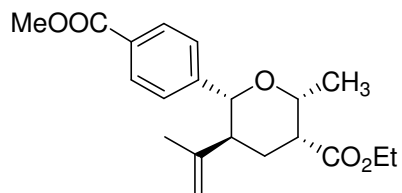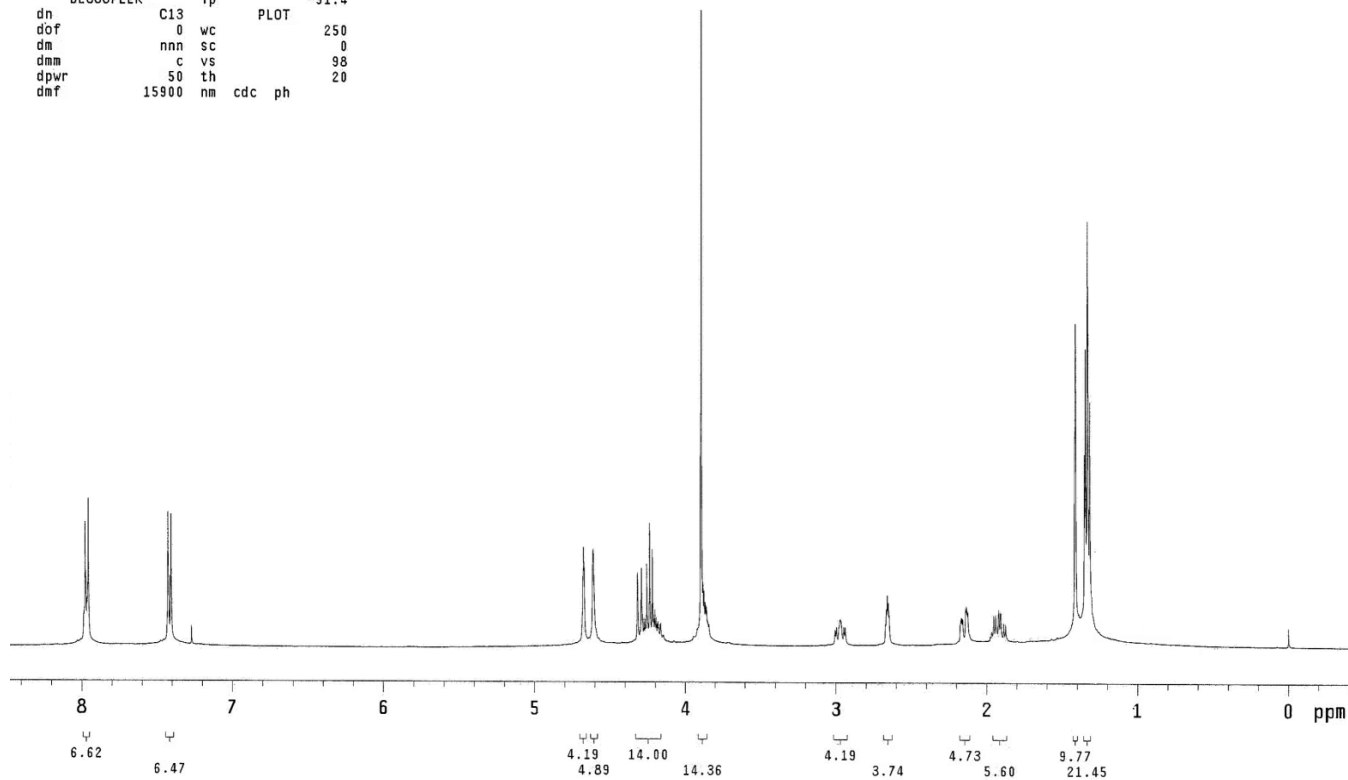



### <sup>13</sup>C NMR spectra of 4g

```
PS_338M
exp1 s2pu1
SAMPLE
date Feb 6 2011 temp not used
solvent CDCl3 gain not used
file /export/home/~ spin not used
ciftemp/AKS_PS_338- hst 0.008
M1_C13.fid pw90 18.600
ACQUISITION a17a 20.000
sw 25125.6 FLAGS
at 1.199 il n
np 60270 in n
fb 13800 dp y
bs 16 hs nn
d1 1.000 PROCESSING
nt 5000 lb 2.00
ct 2048 fn 65536
TRANSMITTER C13 sp -317.9
sfrq 100.554 wp 21030.9
tof 1536.3 rfl 9271.3
tpwr 61 rfp 7764.9
pw 9.300 rp -29.5
DECOUPLER H1 lp -367.6
dn H1 PLOT
dof 0 wc 250
dm yyy sc 0
dmm w vs 43
dpwr 42 th 4
dmf 8900 nm no ph
```

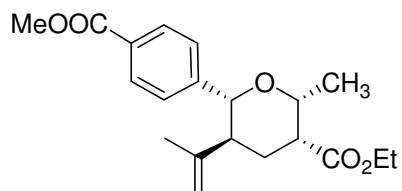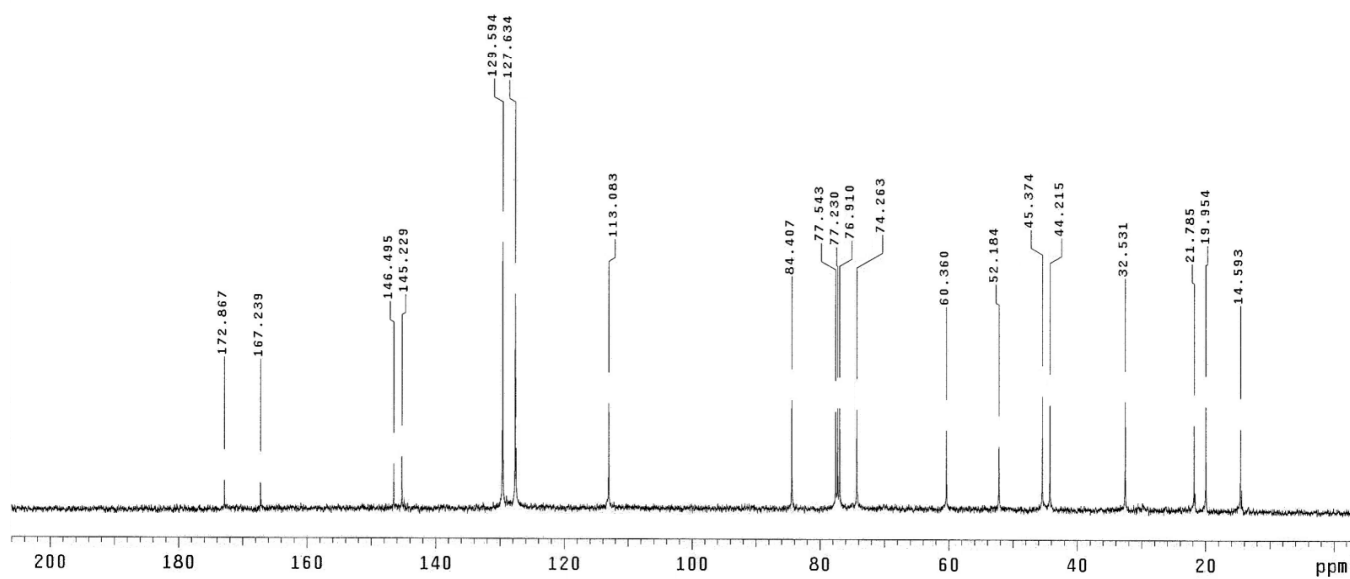

## <sup>1</sup>H NMR spectra of 4h

PS\_468\_M

exp1 s2pu1

| SAMPLE      |             | SPECIAL    |          |
|-------------|-------------|------------|----------|
| date        | Mar 23 2011 | temp       | not used |
| solvent     | CDCl3       | gain       | not used |
| file        |             | spin       | not used |
| ACQUISITION |             | exp        | 0.008    |
| sw          | 6389.8      | pw90       | 19.700   |
| at          | 1.998       | alfa       | 20.000   |
| np          | 25528       | FLAGS      |          |
| fb          | not used    | il         | n        |
| bs          | 8           | in         | n        |
| d1          | 1.000       | dp         | y        |
| nt          | 100         | hs         | nn       |
| ct          | 100         | PROCESSING |          |
| tn          | TRANSMITTER | lb         | 0.10     |
| sfrq        | H1          | fn         | 65536    |
| tof         | 399.853     | DISPLAY    |          |
| tpwr        | 362.8       | sp         | -188.0   |
| pw          | 57          | wp         | 3585.2   |
| dn          | 9.850       | rfl        | 792.5    |
| DECOUPLER   |             | rfp        | 0        |
| dof         | C13         | rp         | 103.4    |
| dm          | 0           | lp         | -53.0    |
| dmm         | nnn         | PLOT       |          |
| dpr         | c           | wc         | 250      |
| dmf         | 50          | sc         | 0        |
|             | 15900       | vs         | 59       |
|             |             | th         | 20       |
|             |             | nm         | cdc ph   |

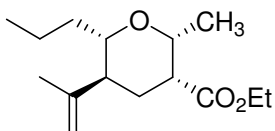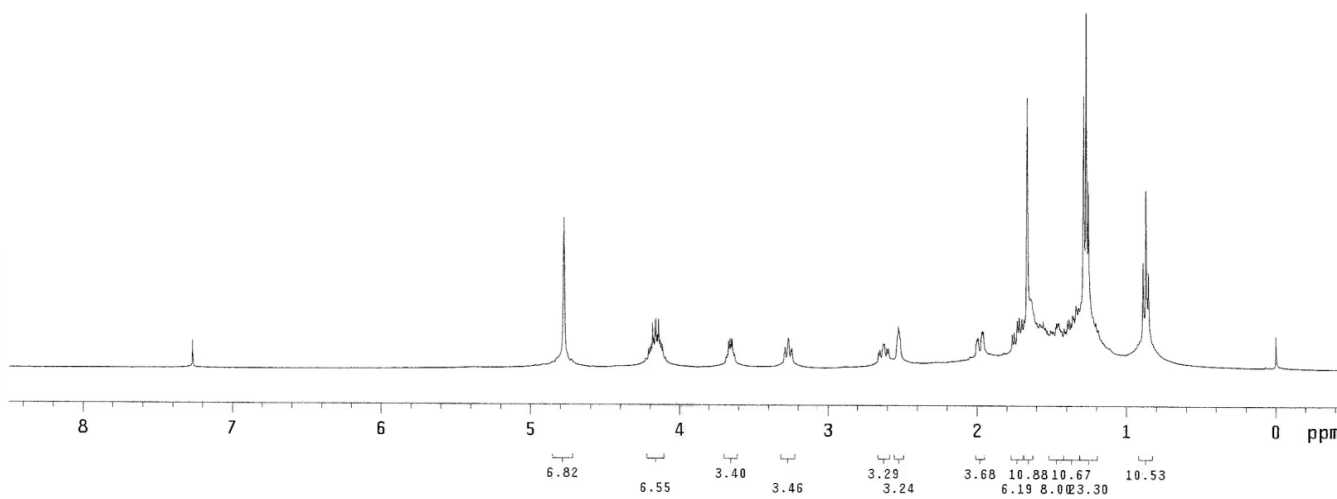

### <sup>13</sup>C NMR spectra of 4h

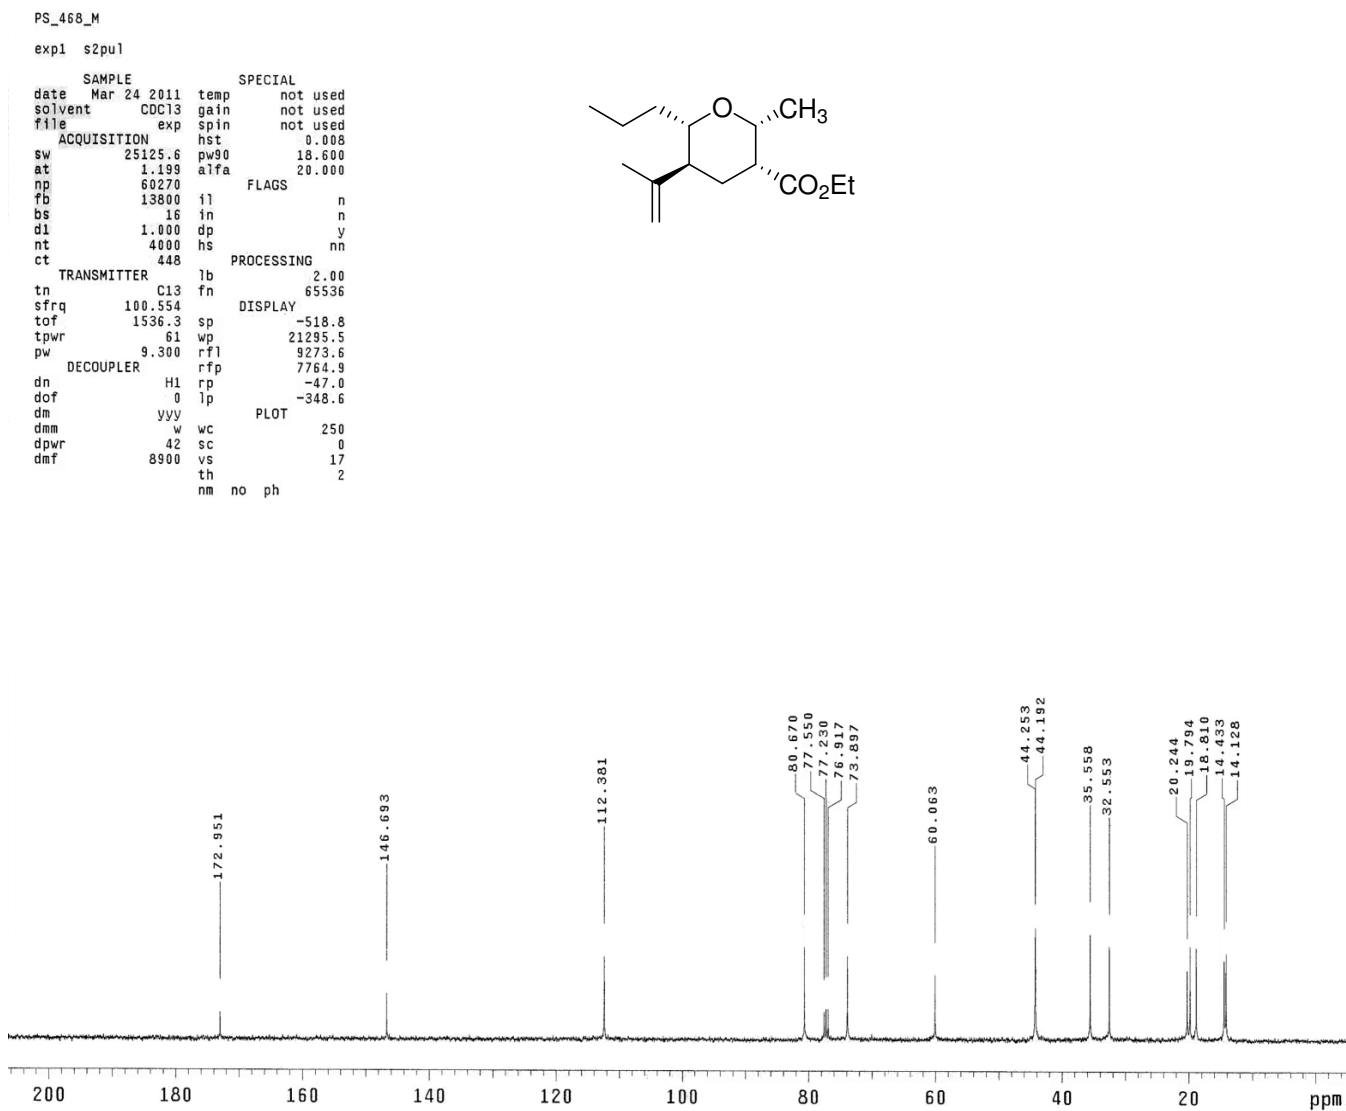

### <sup>1</sup>H NMR spectra of 4i

PS\_417\_M

exp1 s2pu1

| SAMPLE      |                | SPECIAL    |          |
|-------------|----------------|------------|----------|
| date        | Jan 3 2011     | temp       | not used |
| solvent     | CDC13          | gain       | not used |
| file        | /export/home/~ | spin       | not used |
| ciftemp     | AKS_PS_417~    | hst        | 0.008    |
|             | _M2.fid        | pw90       | 19.700   |
|             | alfa           |            | 20.000   |
| ACQUISITION |                | FLAGS      |          |
| sw          | 6389.8         | il         | n        |
| at          | 1.998          | in         | n        |
| np          | 25528          | dp         | y        |
| fb          | not used       | hs         | nn       |
| bs          | 8              | PROCESSING |          |
| d1          | 1.000          | lb         | 0.10     |
| nt          | 100            | fn         | 65536    |
| ct          | 80             | DISPLAY    |          |
| TRANSMITTER |                | H1         | sp       |
| trf         | 399.853        | wp         | -145.3   |
| stf         | 362.8          | rfl        | 3568.4   |
| tpwr        | 57             | rff        | 791.7    |
| pw          | 9.850          | rp         | 0        |
|             |                | rp         | 98.2     |
| DECOUPLER   |                | lp         | -78.3    |
| dn          | C13            | PLOT       |          |
| dof         | 0              | wc         | 250      |
| dm          | nnn            | sc         | 0        |
| dmm         | c              | vs         | 91       |
| dpwr        | 50             | th         | 13       |
| dmf         | 15900          | nm         | cdc ph   |

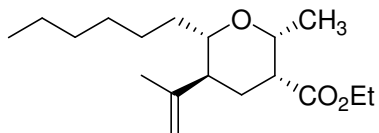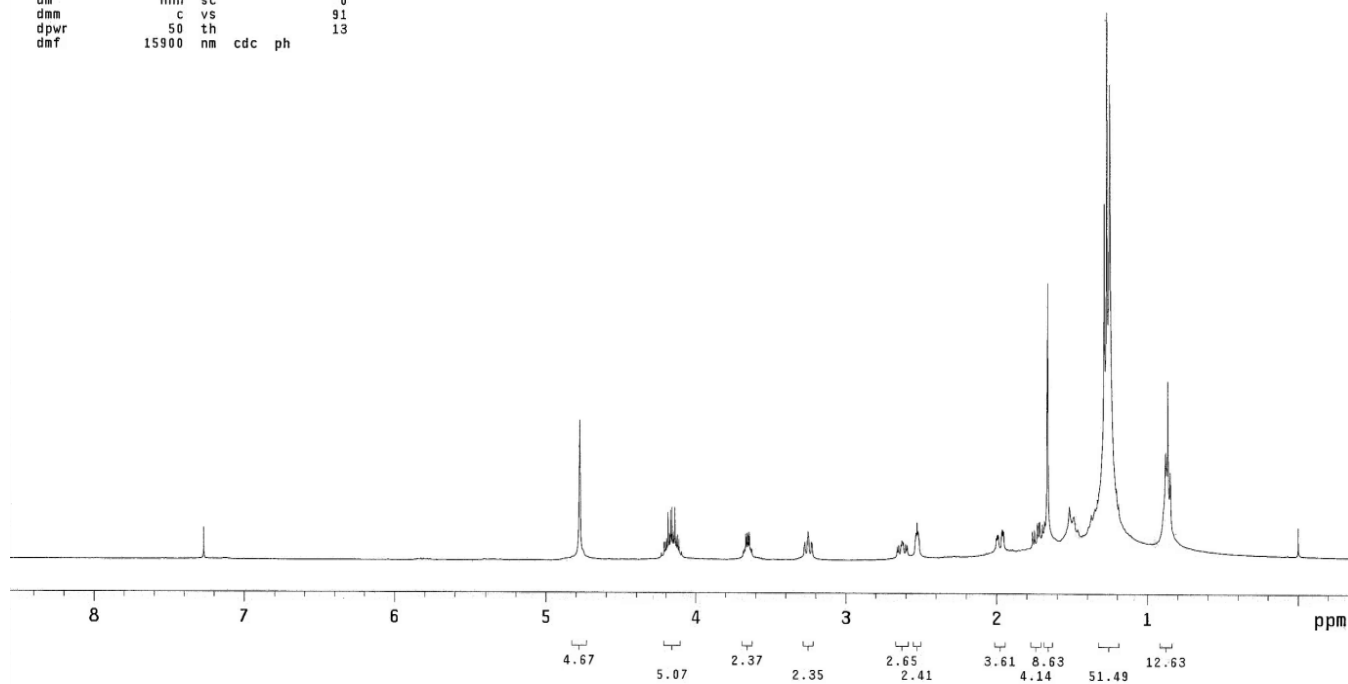

### <sup>13</sup>C NMR spectra of 4i

PS\_417\_M

expl s2pul

| SAMPLE      |                | SPECIAL    |          |
|-------------|----------------|------------|----------|
| date        | Jan 5 2011     | temp       | not used |
| solvent     | CDCl3          | gain       | not used |
| file        | /export/home/~ | spin       | not used |
| ciftemp     | AKS_PS_417~    | hst        | 0.008    |
| _M_C13.fid  |                | pw90       | 18.600   |
| ACQUISITION | alfa           |            | 20.000   |
| sw          | 25125.6        | FLAGS      |          |
| at          | 1.199          | il         | n        |
| np          | 60270          | in         | n        |
| fb          | 13800          | dp         | y        |
| bs          | 16             | hs         | nn       |
| d1          | 1.000          | PROCESSING |          |
| nt          | 12000          | lb         | 2.00     |
| ct          | 12000          | fn         | 65536    |
| TRANSMITTER |                | DISPLAY    |          |
| tn          | C13            | sp         | -515.0   |
| sfrq        | 100.554        | wp         | 21163.6  |
| tof         | 1536.3         | rfl        | 9269.8   |
| tpwr        | 61             | rfp        | 7764.9   |
| pw          | 9.300          | rp         | -42.2    |
| DECOUPLER   |                | lp         | -329.2   |
| dn          | H1             | PLOT       |          |
| dof         | 0              | wc         | 250      |
| dm          | vyv            | sc         | 0        |
| dmm         | w              | vs         | 33       |
| dpwr        | 42             | th         | 3        |
| dmf         | 8900           | nm         | no ph    |

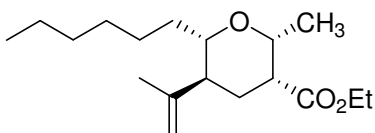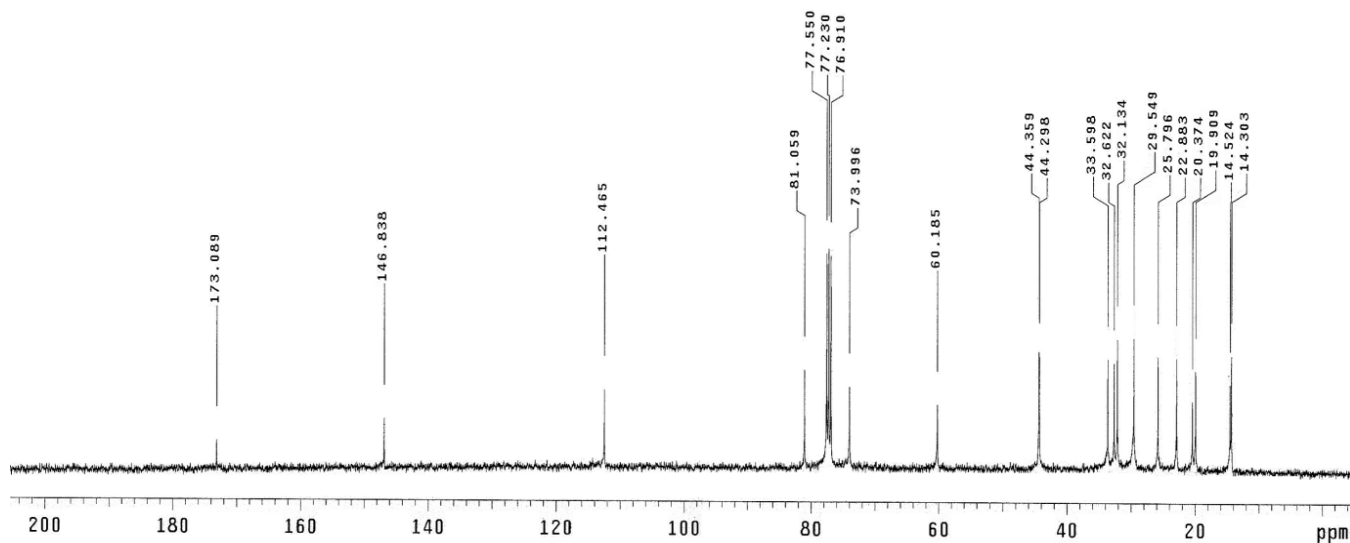

## <sup>1</sup>H NMR spectra of 4j

PS\_413\_M

exp1 s2pu1

| SAMPLE              |             | SPECIAL    |          |
|---------------------|-------------|------------|----------|
| date                | Dec 25 2010 | temp       | not used |
| solvent             | CDCl3       | gain       | not used |
| file /export/home/~ |             | spin       | not used |
| ciftemp/AKS_PS_413~ |             | hst        | 0.008    |
| _M1.fid             |             | pw90       | 19.700   |
| ACQUISITION         | alfa        |            | 20.000   |
| sw                  | 6389.8      | FLAGS      |          |
| at                  | 1.998       | il         | n        |
| np                  | 25528       | in         | n        |
| fb                  | not used    | dp         | y        |
| bs                  | 4           | hs         | nn       |
| d1                  | 1.000       | PROCESSING |          |
| nt                  | 32          | lb         | 0.10     |
| ct                  | 12          | fn         | 65536    |
| TRANSMITTER         |             | DISPLAY    |          |
| tn                  | H1          | sp         | -187.8   |
| sfrq                | 399.853     | wp         | 3576.8   |
| tof                 | 362.8       | rfl        | 792.3    |
| tpwr                | 57          | rfl        | 0        |
| pw                  | 9.850       | rp         | 118.4    |
| DECOUPLER           |             | lp         | -77.4    |
| dn                  | C13         | PLOT       |          |
| dof                 | 0           | wc         | 250      |
| dm                  | nnn         | sc         | 0        |
| dmm                 | c           | vs         | 36       |
| dpwr                | 50          | th         | 20       |
| dmf                 | 15900       | nm         | cdc ph   |

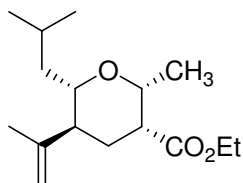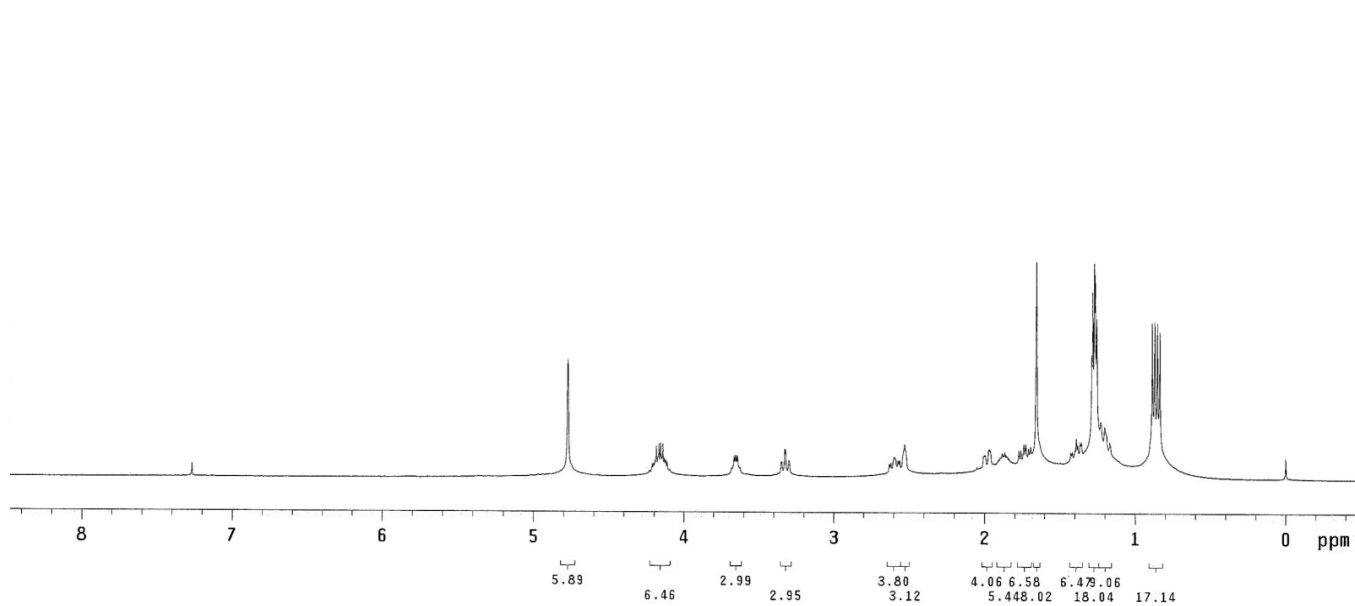

### <sup>13</sup>C NMR spectra of 4j

PS\_413\_M

exp1 s2pu1

| SAMPLE      |                | SPECIAL    |          |
|-------------|----------------|------------|----------|
| date        | Dec 25 2010    | temp       | not used |
| solvent     | CDCl3          | gain       | not used |
| file        | /export/home/~ | spin       | not used |
| ciftemp     | AKS_PS_413     | hst        | 0.008    |
|             | M_C13.fid      | pw90       | 18.600   |
| ACQUISITION | alfa           |            | 20.000   |
| sw          | 25125.6        | FLAGS      |          |
| at          | 1.199          | il         | n        |
| np          | 60270          | in         | n        |
| fb          | 13800          | dp         | y        |
| bs          | 16             | hs         | nn       |
| d1          | 1.000          | PROCESSING |          |
| nt          | 4000           | lb         | 2.00     |
| ct          | 2288           | fn         | 65536    |
| TRANSMITTER | C13            | DISPLAY    |          |
| tn          |                | sp         | -447.5   |
| sfrq        | 100.554        | wp         | 21328.5  |
| tof         | 1536.3         | rfl        | 9268.3   |
| tpwr        | 61             | rfp        | 7764.9   |
| pw          | 9.300          | rp         | -57.5    |
| DECOUPLER   | H1             | lp         | -304.2   |
| dn          | 0              | PLOT       |          |
| dof         | 0              | wc         | 250      |
| dm          | yyy            | sc         | 0        |
| dmm         | w              | vs         | 22       |
| dpwr        | 42             | th         | 3        |
| dmf         | 8900           | nm         | no ph    |

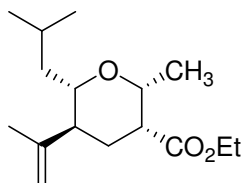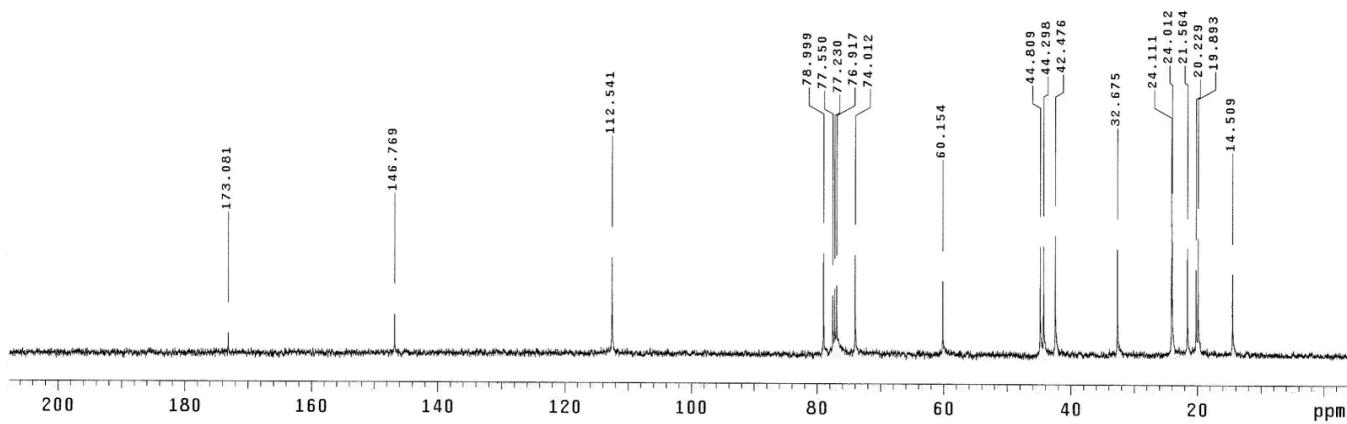

### <sup>1</sup>H NMR spectra of 4k

PS\_456\_L

exp1 s2pu1

| SAMPLE      |                | SPECIAL    |          |
|-------------|----------------|------------|----------|
| date        | Feb 27 2011    | temp       | not used |
| solvent     | CDCl3          | gain       | not used |
| file        | /export/home/~ | spin       | not used |
| ciftemp     | AKS_PS_456~    | hst        | 0.008    |
|             | ~.L.fid        | pw90       | 19.700   |
|             |                | alfa       | 20.000   |
| ACQUISITION |                | FLAGS      |          |
| sw          | 6389.8         |            |          |
| at          | 1.998          | il         | n        |
| np          | 25528          | in         | n        |
| fb          | not used       | dp         | y        |
| bs          | 8              | hs         | nn       |
| d1          | 1.000          | PROCESSING |          |
| nt          | 100            | lb         | 0.10     |
| ct          | 100            | fn         | 65536    |
| TRANSMITTER |                | DISPLAY    |          |
| tn          | H1             | sp         | -184.9   |
| sfrq        | 399.853        | wp         | 3585.2   |
| tof         | 362.8          | rfl        | 797.8    |
| tpwr        | 57             | rff        | 0        |
| pw          | 9.850          | rp         | 112.6    |
|             |                | lp         | -93.9    |
| DECOUPLER   |                | PLOT       |          |
| dn          | C13            |            |          |
| dof         | 0              | wc         | 250      |
| dm          | nnn            | sc         | 0        |
| dmm         | c              | vs         | 48       |
| dpwr        | 50             | th         | 20       |
| dmf         | 15900          | nm         | cdc ph   |

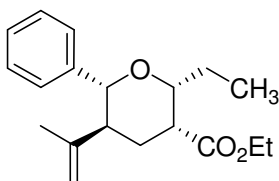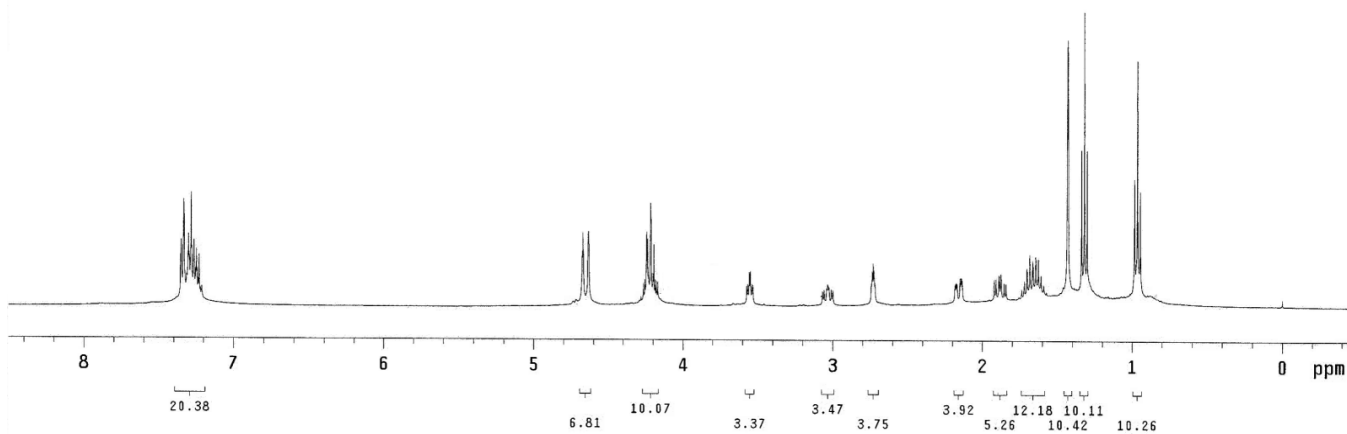



### <sup>13</sup>C NMR spectra of 4k

PS\_456\_L

exp1 s2pu1

| SAMPLE      |             | SPECIAL |          |
|-------------|-------------|---------|----------|
| date        | Feb 27 2011 | temp    | not used |
| solvent     | CDCl3       | gain    | not used |
| file        |             | spin    | not used |
| ACQUISITION |             | exp     | not used |
| sw          | 25125.6     | hst     | 0.008    |
| at          | 1.199       | pw90    | 18.600   |
| np          | 60270       | alfa    | 20.000   |
| fb          | 13800       | il      | n        |
| bs          | 16          | in      | n        |
| d1          | 1.000       | dp      | y        |
| nt          | 8000        | hs      | nn       |
| ct          | 4000        | hs      | nn       |
| TRANSMITTER |             | lb      | 2.00     |
| tn          | C13         | fn      | 65536    |
| sfrq        | 100.554     | DISPLAY |          |
| tof         | 1536.3      | sp      | -516.5   |
| tpwr        | 81          | wp      | 21328.5  |
| pw          | 9.300       | rfl     | 9271.3   |
| DECOUPLER   |             | rfp     | 7764.9   |
| dn          | H1          | rp      | -30.4    |
| dof         | 0           | lp      | -376.7   |
| dm          | yyy         | PLOT    |          |
| dmm         | w           | wc      | 250      |
| dpwr        | 42          | sc      | 0        |
| dmf         | 8900        | vs      | 30       |
|             |             | th      | 4        |
|             |             | nm      | no ph    |

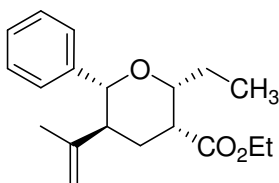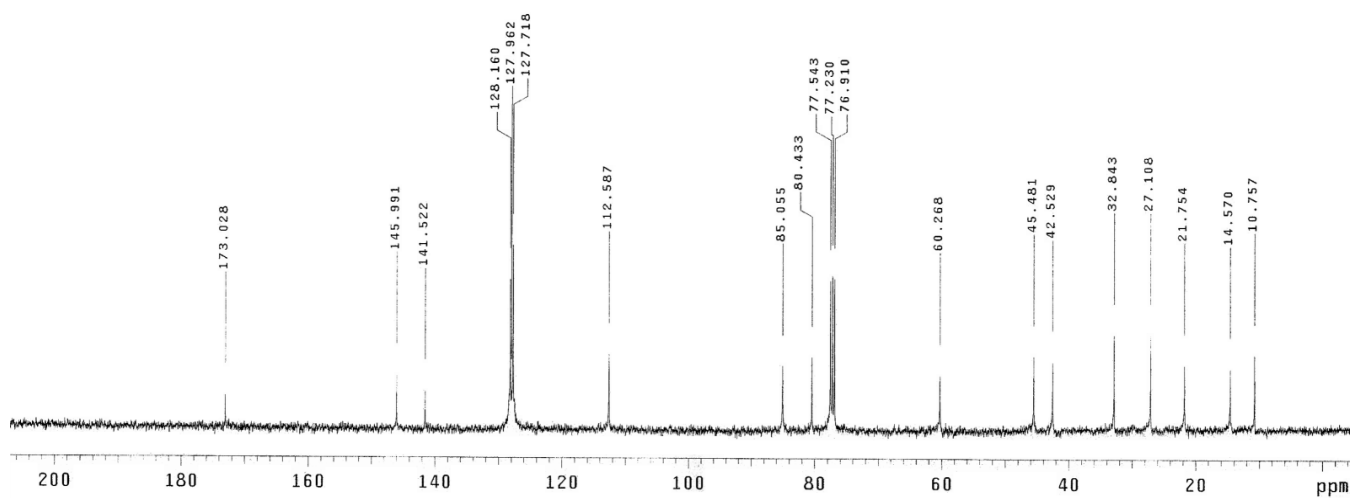

### <sup>1</sup>H NMR spectra of 4l

PS\_464\_M

exp1 s2pu1

| SAMPLE      |             | SPECIAL    |          |
|-------------|-------------|------------|----------|
| date        | Mar 14 2011 | temp       | not used |
| solvent     | CDCl3       | gain       | not used |
| file        | exp         | spin       | not used |
| ACQUISITION |             | hst        | 0.008    |
| sw          | 6389.8      | pw90       | 19.700   |
| at          | 1.998       | alfa       | 20.000   |
| np          | 25528       | FLAGS      |          |
| fb          | not used    | il         | n        |
| bs          | 8           | in         | n        |
| d1          | 1.000       | dp         | y        |
| nt          | 100         | hs         | nn       |
| ct          | 100         | PROCESSING |          |
| tn          | TRANSMITTER | lb         | 0.10     |
| sfrq        | H1          | fn         | 65536    |
| tof         | 399.853     | DISPLAY    |          |
| tpwr        | 362.8       | sp         | -191.1   |
| pw          | 57          | wp         | 3593.6   |
| dn          | 9.850       | rfl        | 795.6    |
| dof         | 0           | rfd        | 0        |
| dmm         | C13         | rp         | 114.9    |
| dpwr        | 50          | lp         | -75.0    |
| dmf         | 15900       | PLOT       |          |
|             |             | wc         | 250      |
|             |             | sc         | 0        |
|             |             | vs         | 50       |
|             |             | th         | 14       |
|             |             | nm         | cdc ph   |

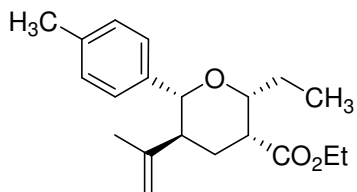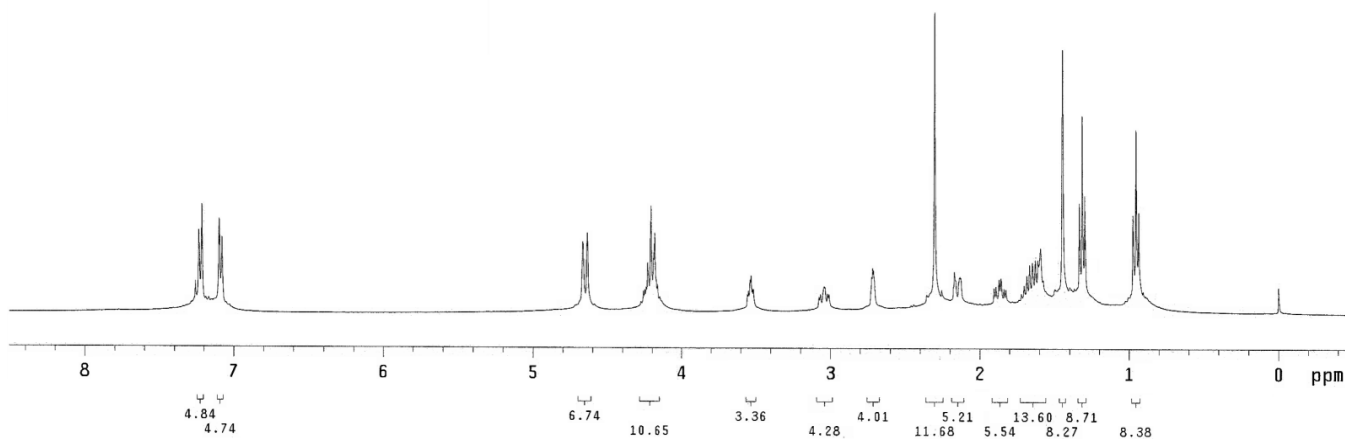

### <sup>13</sup>C NMR spectra of 4l

```
PS_464_M
expl s2pu1
SAMPLE          SPECIAL
date Mar 14 2011 temp not used
solvent CDCl3 gain not used
file exp spin not used
ACQUISITION hst 0.008
sw 25125.6 pw90 18.600
at 1.199 alfa 20.000
np 60270
fb 13800 fl n
bs 16 in n
dl 1.000 dp y
nt 4000 hs nn
ct 2544
TRANSMITTER lb 2.00
tn C13 fn 65536
sfrq 100.554
tof 1536.3
tpwr 61 wp -551.0
pw 9.300 rfl 9272.9
DECOUPLER rfp 7764.9
dn H1 rp -64.5
dof 0 lp -297.0
dm yyy
dmm w wc 250
dpwr 42 sc 0
dmf 8900 vs 34
th 3
nm no ph
```

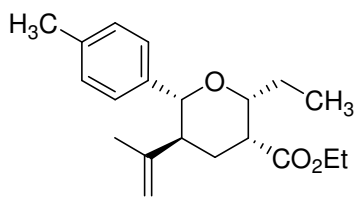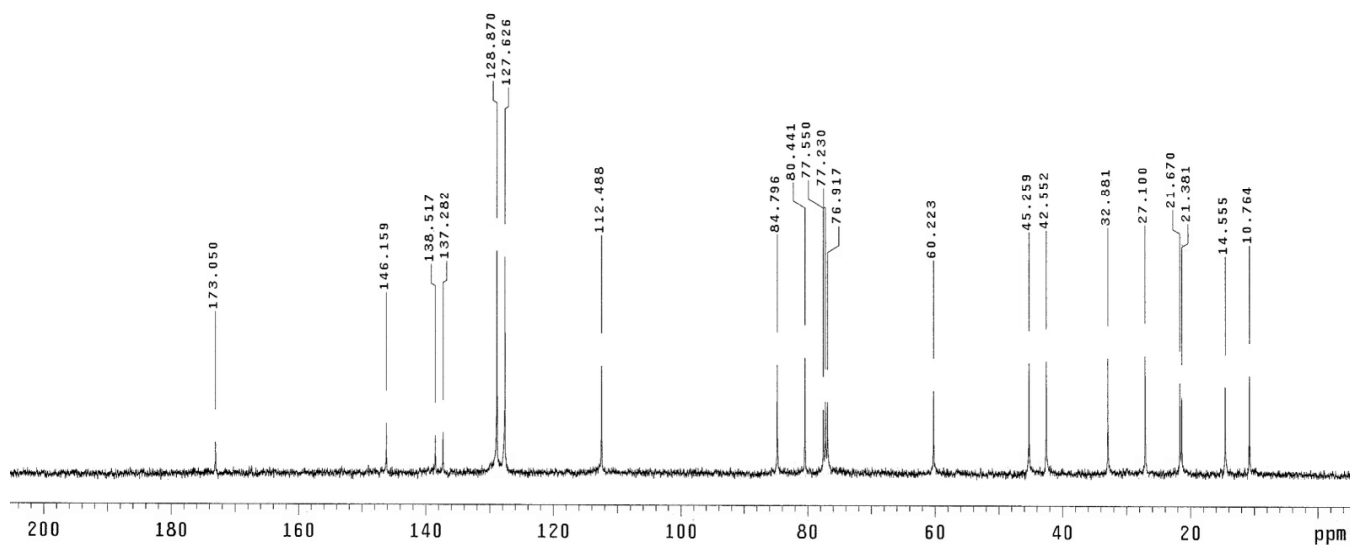

### <sup>1</sup>H NMR spectra of 4m

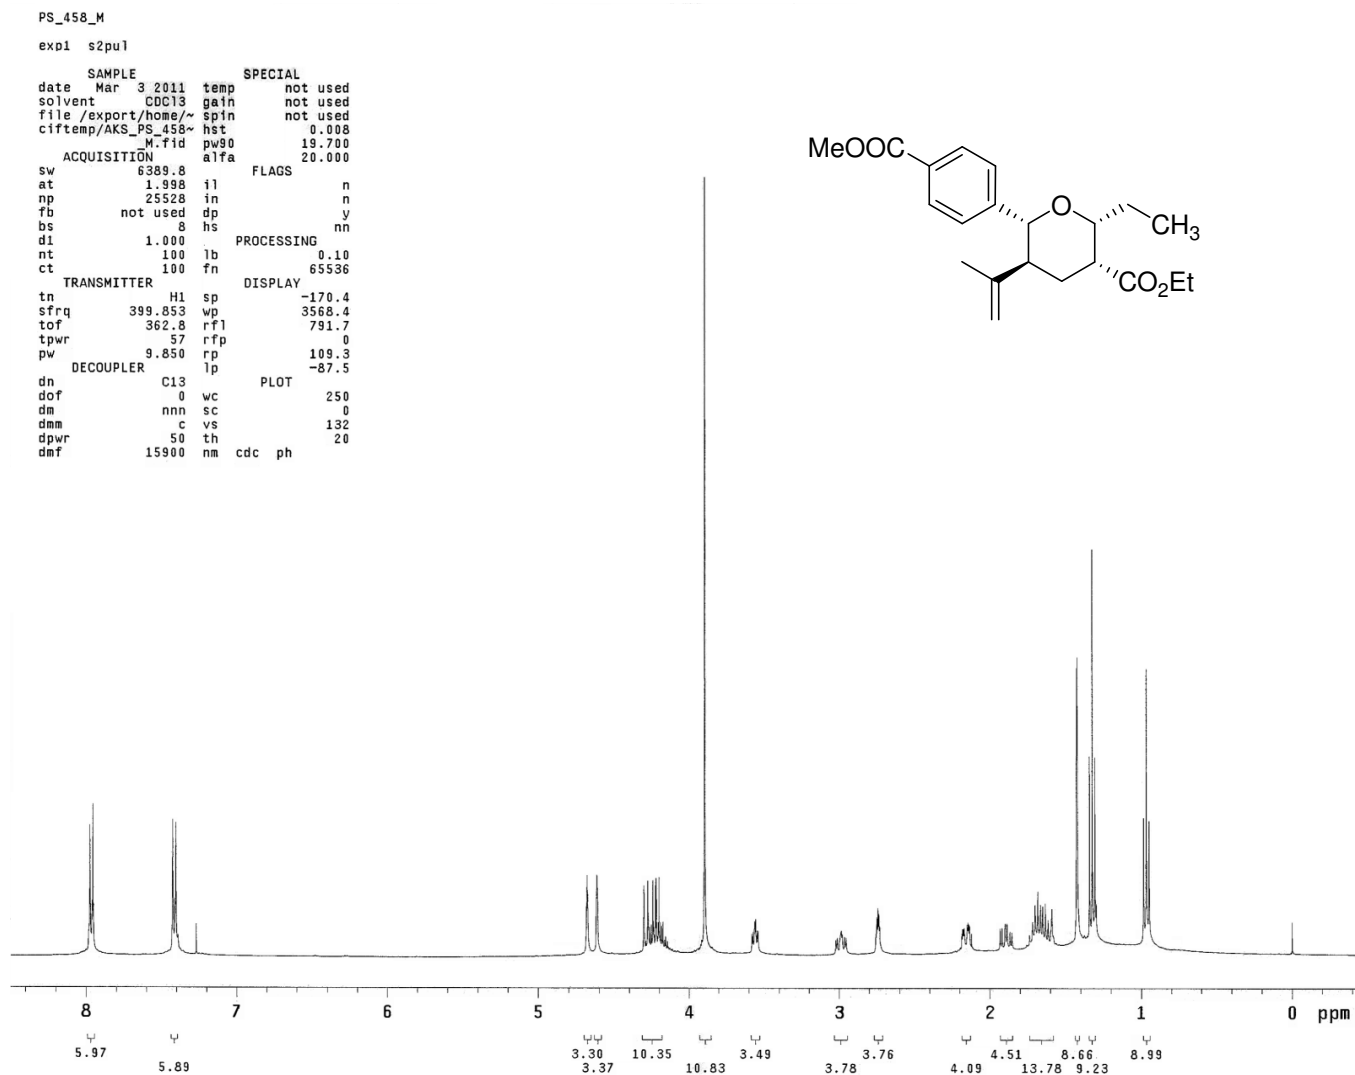

### <sup>13</sup>C NMR spectra of 4m

```
PS_458_M
exp1 s2pu1
SAMPLE
date Mar 4 2011 temp not used
solvent CDCl3 gain not used
file exp spin not used
ACQUISITION
sw 25125.6 hst 0.008
at 1.199 pw90 18.600
np 60270 alfa 20.000
fb 13800 FLAGS n
bs 16 in n
dl 1.000 dp y
nt 5000 hs nn
ct 3056 PROCESSING
tn TRANSMITTER lb 2.00
C13 fn 65536
sfrq 100.554 DISPLAY
tof 1536.3 sp -615.4
tpwr 61 wp 21229.5
pw 9.300 rfl 9271.3
DECOUPLER rfp 7764.9
dn H1 rp -51.1
dof 0 lp -334.6
dm vvyv PLOT
dmm w wc 250
dpwr 42 sc 0
daf 8900 vs 39
th 4
nm no ph
```

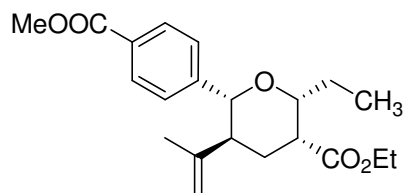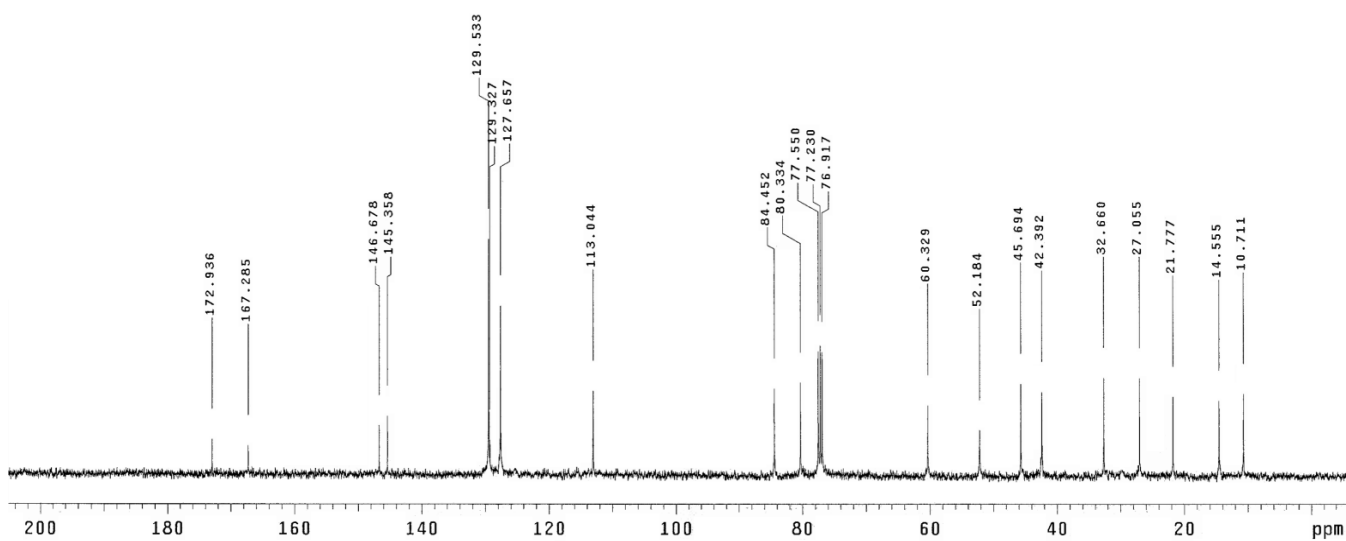

### <sup>1</sup>H NMR spectra of 4n

PS\_463\_L

exp1 s2pu1

| SAMPLE      |             | SPECIAL    |          |
|-------------|-------------|------------|----------|
| date        | Mar 12 2011 | temp       | not used |
| solvent     | CDCl3       | gain       | not used |
| file        | exp         | spin       | not used |
| ACQUISITION |             | hst        | 0.008    |
| sw          | 6389.8      | pw90       | 19.700   |
| at          | 1.998       | alfa       | 20.000   |
| np          | 25528       | FLAGS      |          |
| fb          | not used    | il         | n        |
| bs          | 8           | in         | n        |
| d1          | 1.000       | dp         | y        |
| nt          | 200         | hs         | nn       |
| ct          | 192         | PROCESSING |          |
| TRANSMITTER |             | lb         | 0.10     |
| tn          | H1          | fn         | 65536    |
| sfrq        | 399.853     | DISPLAY    |          |
| tof         | 362.8       | sp         | -172.2   |
| tpwr        | 57          | wp         | 3593.6   |
| pw          | 9.850       | rfl        | 793.5    |
| DECOUPLER   |             | rffp       | 0        |
| dn          | C13         | rp         | 117.4    |
| dof         | 0           | lp         | -94.6    |
| dm          | nnn         | PLOT       |          |
| dmm         | c           | wc         | 250      |
| dpwr        | 50          | sc         | 0        |
| dmf         | 15900       | vs         | 40       |
|             |             | th         | 33       |
|             |             | nm         | cdc ph   |

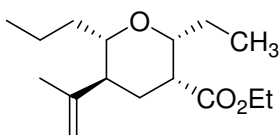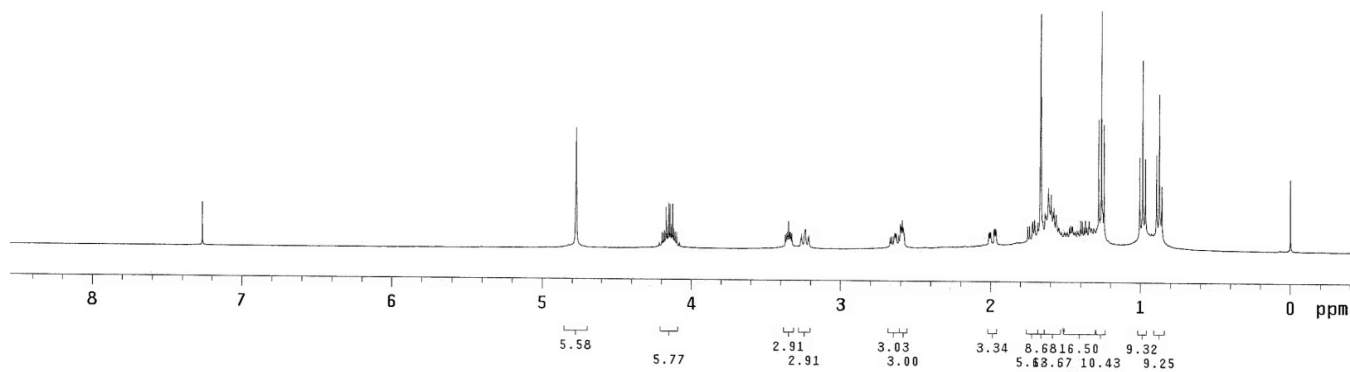

### <sup>13</sup>C NMR spectra of 4n

PS\_463\_L

exp1 s2pu1

| SAMPLE      |             | SPECIAL    |          |
|-------------|-------------|------------|----------|
| date        | Mar 12 2011 | temp       | not used |
| solvent     | CDC13       | gain       | not used |
| file        | exp         | spin       | not used |
| ACQUISITION |             | hst        | 0.008    |
| sw          | 25125.6     | pw90       | 18.600   |
| at          | 1.199       | alfa       | 20.000   |
| np          | 60270       | FLAGS      |          |
| fb          | 13800       | il         | n        |
| bs          | 16          | in         | n        |
| d1          | 1.000       | dp         | y        |
| nt          | 5000        | hs         | nn       |
| ct          | 3216        | PROCESSING |          |
| TRANSMITTER |             | lb         | 2.00     |
| tn          | C13         | fn         | 65536    |
| sfrq        | 100.554     | DISPLAY    |          |
| tof         | 1536.3      | sp         | -547.2   |
| tpwr        | 61          | wp         | 21262.5  |
| pw          | 9.300       | rfl        | 9269.0   |
| DECOUPLER   |             | rffp       | 7784.3   |
| dn          | H1          | rp         | -54.9    |
| dof         | 0           | lp         | -339.8   |
| dm          | VVY         | PLOT       |          |
| dmm         | w           | wc         | 250      |
| dpwr        | 42          | sc         | 0        |
| dmf         | 8900        | vs         | 17       |
|             |             | th         | 3        |
|             |             | nm         | no ph    |

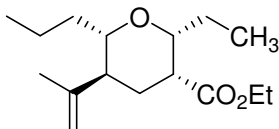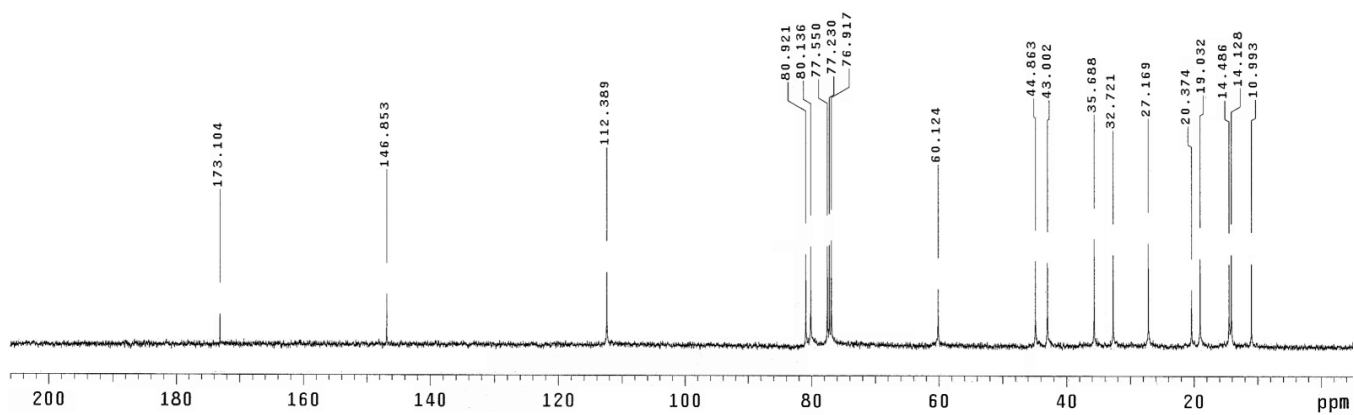

### <sup>1</sup>H NMR spectra of 4o

```
PS_469_M
exp1 s2pu1
SAMPLE
date Mar 27 2011 temp not used
solvent CDCl3 gain not used
file exp spin not used
ACQUISITION hst 0.008
sw 6389.8 pw90 19.700
at 1.998 alfa 20.000
np 25528
fb not used il n
bs 8 in n
dl 1.000 dp y
nt 100 hs nn
ct 100
TRANSMITTER lb 0.10
tn H1 fn 65536
sfrq 399.853
tof 362.8 sp DISPLAY -180.4
tpwr 57 wp 3568.4
pw 9.850 rfl 793.3
DECOUPLER rfp 0
dn C13 rp 97.7
dof 0 lp -58.8
dm nnn PLOT
dmm c wc 250
dpwr 50 sc 0
dmf 15900 vs 57
nm cdc ph th 20
```

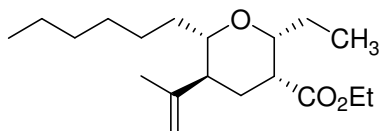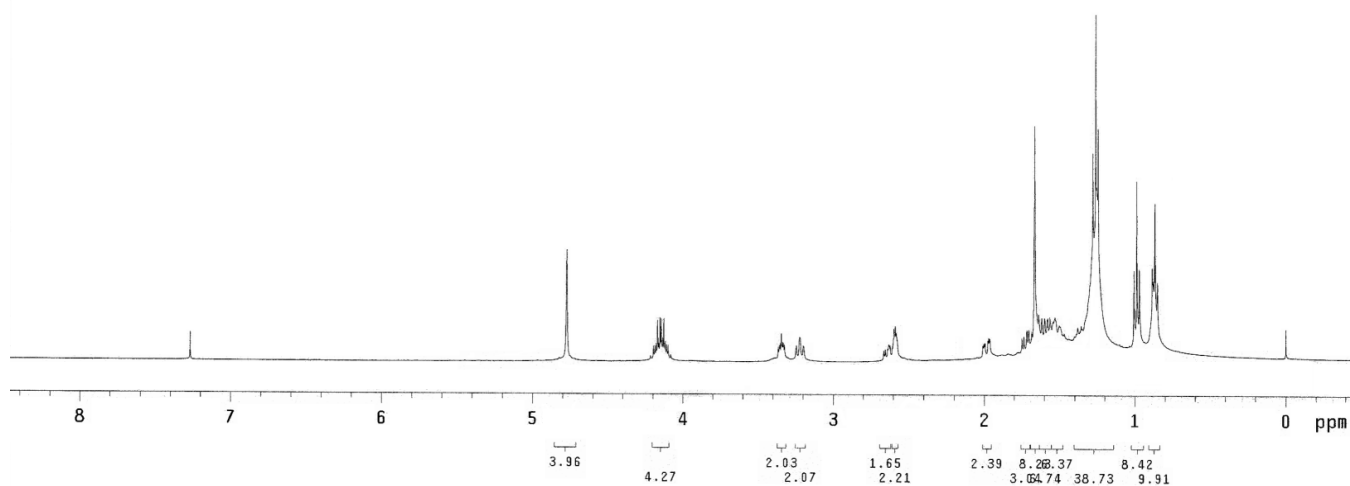



### <sup>13</sup>C NMR spectra of 4o

```
PS_469_M
expl s2pu1
SAMPLE
date Mar 27 2011 temp not used
solvent CDCl3 gain not used
file exp spin not used
ACQUISITION
sw 25125.6 hst 0.008
at 1.199 pwa 18.600
np 60270 alfa 20.000
fb 13800 il n
bs 16 fn n
d1 1.000 dp y
nt 4000 hs nn
ct 672
TRANSMITTER
tn C13 lb 2.00
sfrq 100.554 fn 65536
tof 1536.3 sp DISPLAY -551.0
tpwr 61 wp 21262.5
pw 9.300 rfl 9272.9
DECOUPLER rfp 7764.9
dn H1 rp -51.7
dof 0 lp -331.1
dm vvy PLOT
dmm w wc 250
dpwr 42 sc 0
dmf 8900 vs 13
th 4
nm no ph
```

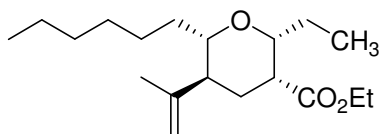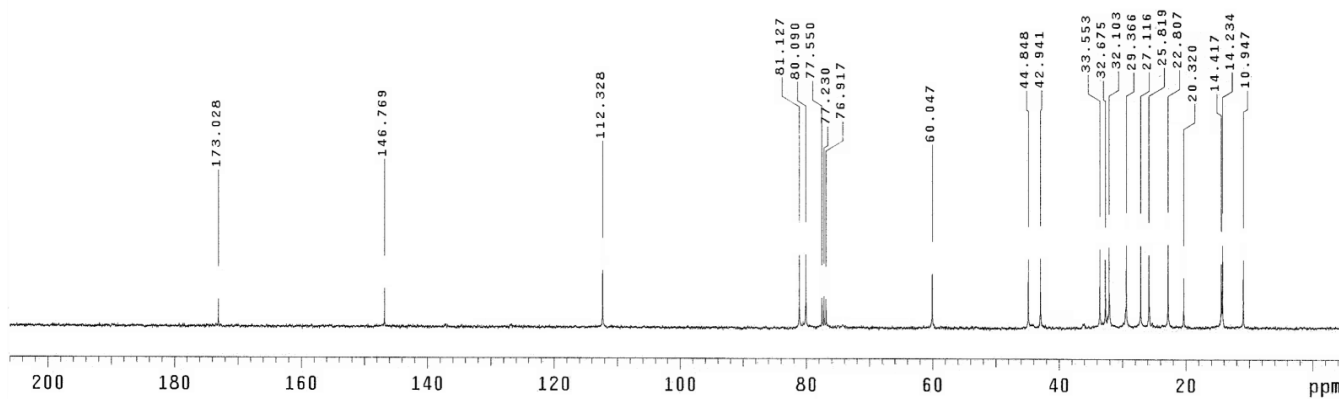

## <sup>1</sup>H NMR spectra of 4p

PS\_467\_M

expl s2pu1

```
SAMPLE          SPECIAL
date Mar 22 2011 temp not used
solvent CDCl3 gain not used
file /export/home/~ spin not used
ciftemp/AKS_PS_467~ hst 0.008
_M.fid pw90 19.700
ACQUISITION alfa 20.000
sw 6389.8 FLAGS
at 1.998 il n
np 25528 in n
fb not used dp y
bs 8 hs nn
d1 1.000 PROCESSING
nt 100 lb 0.10
ct 100 fn 65536
TRANSMITTER H1 sp DISPLAY
tn -179.4
sfrq 399.853 wp 3602.0
tof 362.8 rfl 792.3
tpwr 57 rfp 0
pw 9.850 rp 106.8
DECOUPLER lp -85.7
dn C13 PLOT
dof 0 wc 250
dm nnn sc 0
dmm c vs 43
dpwr 50 th 27
dmf 15900 nm cdc ph
```

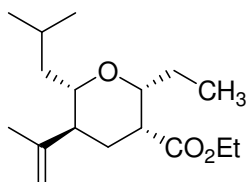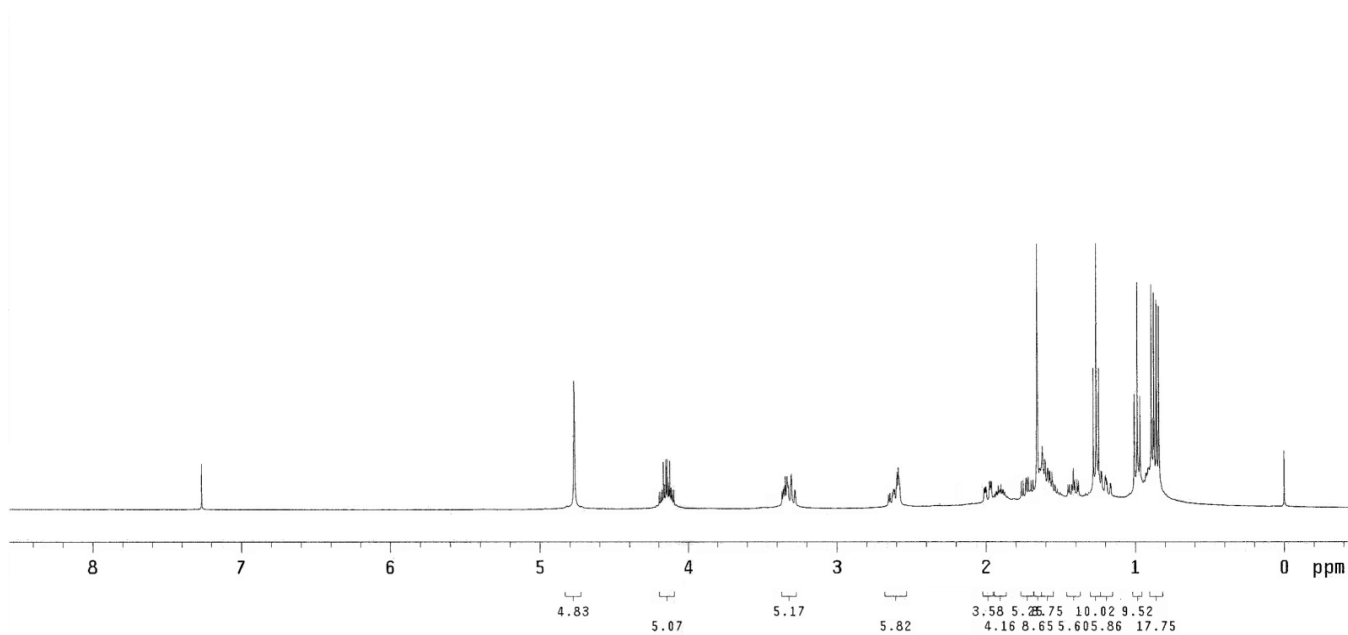

### <sup>13</sup>C NMR spectra of 4p

PS\_467\_M

expl s2pu1

| SAMPLE      |             | SPECIAL    |          |
|-------------|-------------|------------|----------|
| date        | Mar 22 2011 | temp       | not used |
| solvent     | CDC13       | gain       | not used |
| file        |             | spin       | not used |
| ACQUISITION |             | hst        | 0.008    |
| sw          | 25125.6     | pw90       | 18.600   |
| at          | 1.199       | alfa       | 20.000   |
| np          | 60270       | FLAGS      |          |
| fb          | 13800       | il         | n        |
| bs          | 16          | in         | n        |
| d1          | 1.000       | dp         | y        |
| nt          | 5000        | hs         | nn       |
| ct          | 2528        | PROCESSING |          |
| TRANSMITTER | lb          |            | 2.00     |
| tn          | C13         | fn         | 65536    |
| sfrq        | 100.554     | DISPLAY    |          |
| tof         | 1536.3      | sp         | -416.1   |
| tpwr        | 61          | wp         | 21096.9  |
| pw          | 9.300       | rfl        | 9269.8   |
| DECOUPLER   | rfl         | rfl        | 7764.9   |
| dn          | H1          | rp         | -46.5    |
| dof         | 0           | lp         | -338.2   |
| dm          | yyy         | PLOT       |          |
| dmm         | w           | wc         | 250      |
| dpwr        | 42          | sc         | 0        |
| dmf         | 8900        | vs         | 27       |
|             |             | th         | 4        |
|             |             | nm         | no ph    |

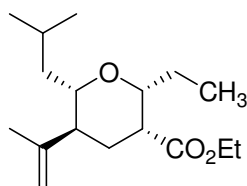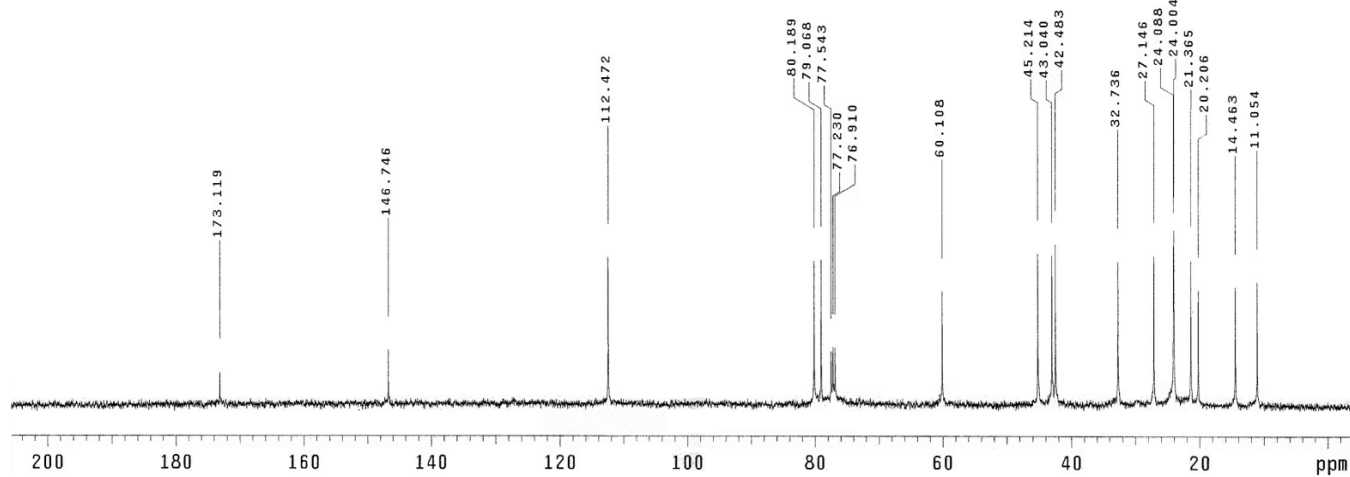

### <sup>1</sup>H NMR spectra of 11a

expl s2pu1

| SAMPLE      |                | SPECIAL    |          |
|-------------|----------------|------------|----------|
| date        | Sep 7 2011     | temp       | not used |
| solvent     | CDCl3          | gain       | not used |
| file        | /export/home/~ | spin       | not used |
| ciftemp     | AKS_PS_430~    | hst        | 0.008    |
|             | M_Pdt.fid      | pw90       | 19.700   |
| ACQUISITION |                | alfa       | 20.000   |
| sw          | 6389.8         | FLAGS      |          |
| at          | 1.998          | il         | n        |
| np          | 25528          | in         | n        |
| fb          | not used       | dp         | y        |
| bs          | 4              | hs         | nn       |
| d1          | 1.000          | PROCESSING |          |
| nt          | 200            | fn         | not used |
| ct          | 164            | DISPLAY    |          |
| TRANSMITTER |                | sp         | -207.1   |
| tn          | H1             | wp         | 3618.7   |
| sfrq        | 399.853        | rfl        | 794.5    |
| tof         | 362.8          | rfp        | 0        |
| tpwr        | 57             | rp         | 135.4    |
| pw          | 9.850          | lp         | -84.7    |
| DECOUPLER   |                | PLOT       |          |
| dn          | C13            | wc         | 250      |
| dof         | 0              | sc         | 0        |
| dm          | nnn            | vs         | 61       |
| dmm         | c              | th         | 8        |
| dpwr        | 50             | nm         | ph       |
| dmf         | 15900          |            |          |

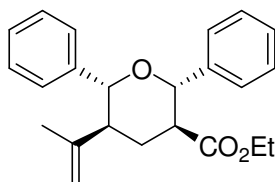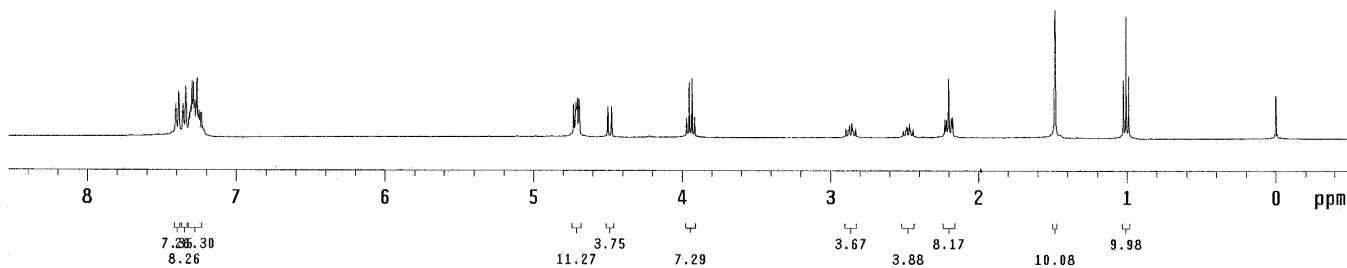

### $^{13}\text{C}$ NMR spectra of 11a

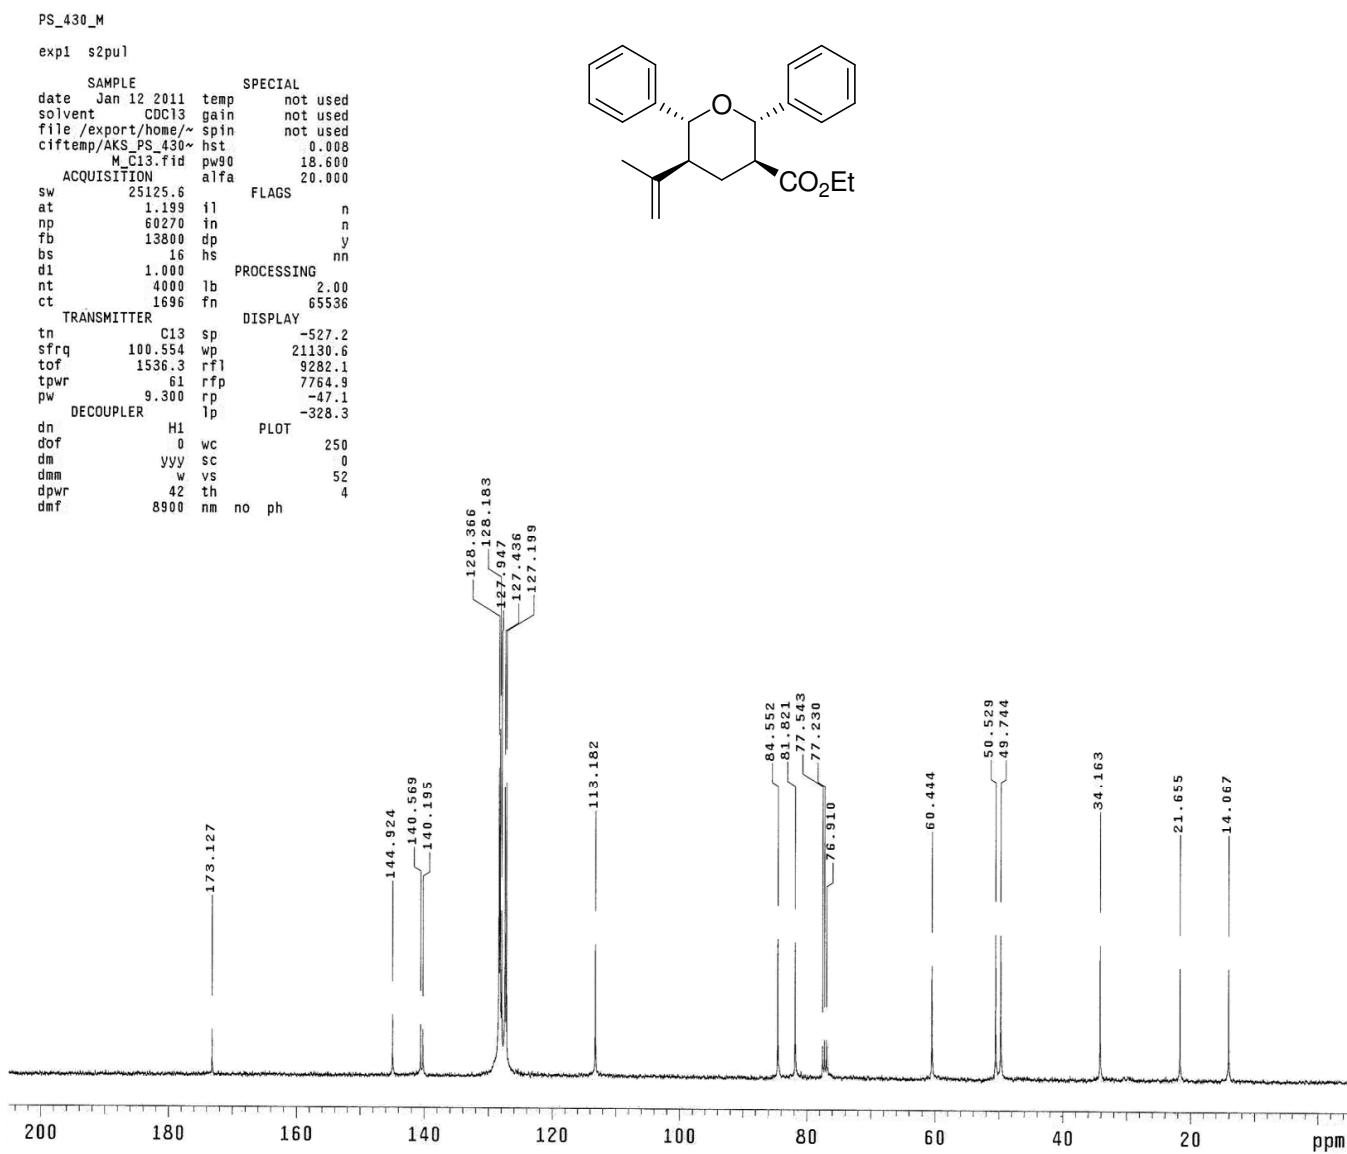

### <sup>1</sup>H NMR spectra of 11b

PS\_431\_M

exp1 s2pu1

| SAMPLE      |                | SPECIAL    |          |
|-------------|----------------|------------|----------|
| date        | Jan 12 2011    | temp       | not used |
| solvent     | CDCl3          | gain       | not used |
| file        | /export/home/~ | spin       | not used |
| ciftemp     | AKS_PS_431~    | hst        | 0.008    |
|             | M.fid          | pw90       | 19.700   |
|             | alfa           |            | 20.000   |
| ACQUISITION |                | FLAGS      |          |
| sw          | 6389.8         |            |          |
| at          | 1.998          | fl         | n        |
| np          | 25528          | in         | n        |
| fb          | not used       | dp         | y        |
| bs          | 8              | hs         | nn       |
| d1          | 1.000          | PROCESSING |          |
| nt          | 100            | lb         | 0.10     |
| ct          | 100            | fn         | 65536    |
| TRANSMITTER |                | DISPLAY    |          |
| tn          | H1             | sp         | -219.4   |
| sfrq        | 399.853        | wp         | 3602.0   |
| tof         | 362.8          | rfl        | 788.6    |
| tpwr        | 57             | rfp        | 0        |
| pw          | 9.850          | rp         | 109.2    |
|             | lpc            |            | -82.3    |
| DECOUPLER   |                | PLOT       |          |
| dn          | C13            |            |          |
| dof         | 0              | wc         | 250      |
| dm          | nnn            | sc         | 0        |
| dmm         | c              | vs         | 23       |
| dpwr        | 50             | th         | 24       |
| dmf         | 15900          | nm         | cdc ph   |

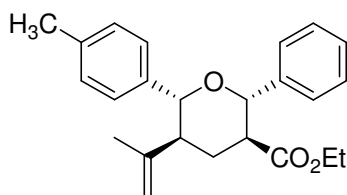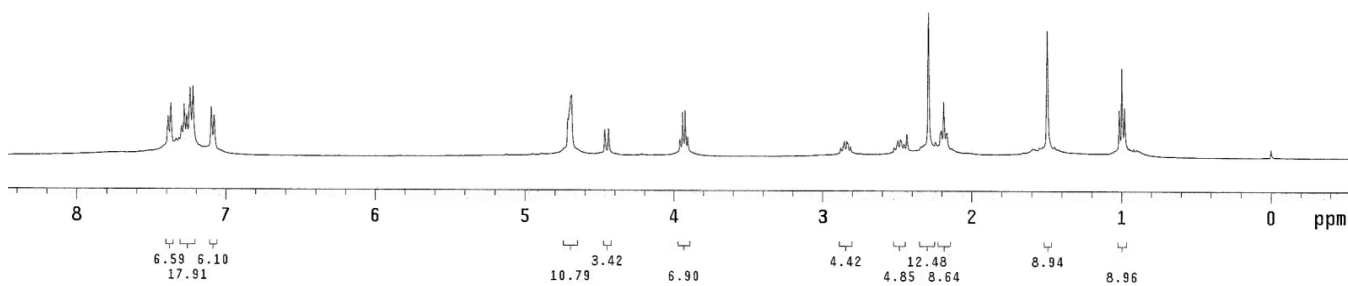

### $^{13}\text{C}$ NMR spectra of 11b

```
PS_431_M
exp1 s2pu1
SAMPLE
date Jan 12 2011 temp not used
solvent CDCl3 gain not used
file /export/home/~ spin not used
ciftemp/AKS_PS_431~ hst 0.008
M_C13.fid pw90 18.600
ACQUISITION alfa 20.000
sw 25125.6 FLAGS
at 1.199 il n
np 60270 in n
fb 13800 dp y
bs 16 hs nn
d1 1.000 PROCESSING
nt 2000 lb 2.00
ct 512 fn 65536
TRANSMITTER DISPLAY
tn C13 sp -495.8
sfrq 100.554 wp 21196.6
tof 1536.3 rfl 9283.6
tpwr 61 rfp 7764.9
pw 9.300 rp -48.7
DECOUPLER lp -324.1
dn H1 PLOT
dof 0 wc 250
dm vyy sc 0
dmm w vs 31
dpwr 42 th 3
dmf 8900 nm no ph
```

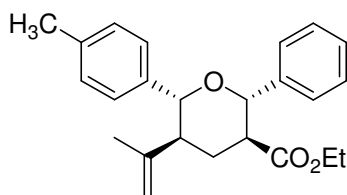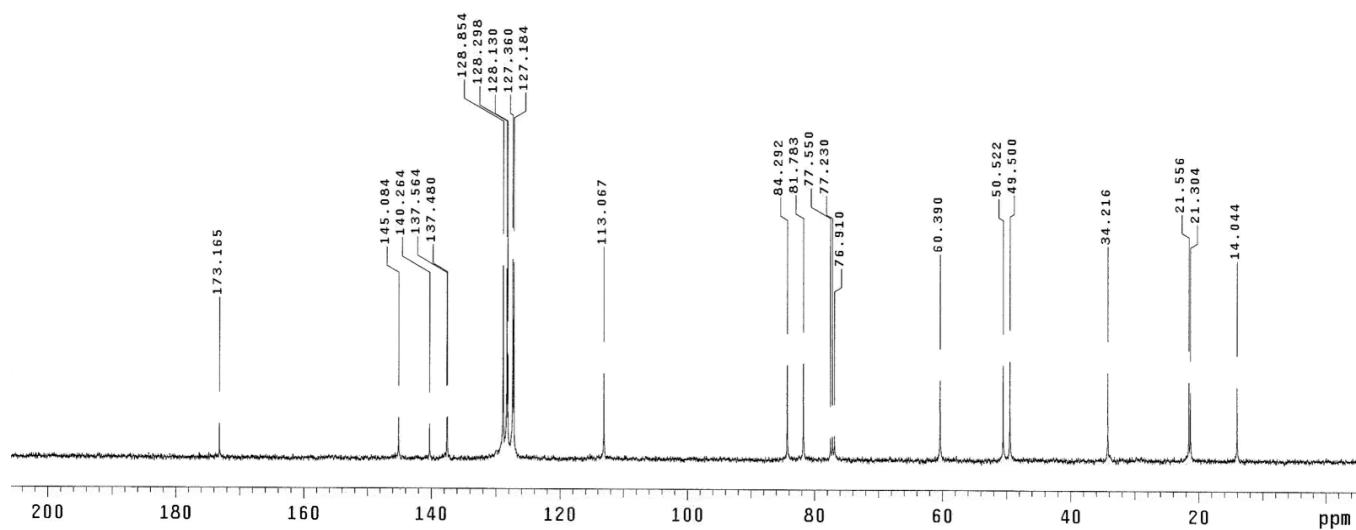

### <sup>1</sup>H NMR spectra of 11c

exp1 s2pu1

| SAMPLE              |                | SPECIAL    |          |
|---------------------|----------------|------------|----------|
| date                | Jun 9 2011     | temp       | not used |
| solvent             | CDCl3          | gain       | not used |
| file                | /export/home/~ | spin       | not used |
| ciftemp/AKS_PS_494~ |                | hst        | 0.008    |
| M_Pdt.fid           |                | pw90       | 19.700   |
| ACQUISITION         | alfa           |            | 20.000   |
| sw                  | 6389.8         | FLAGS      |          |
| at                  | 1.998          | il         | n        |
| np                  | 25528          | in         | n        |
| fb                  | not used       | dp         | y        |
| bs                  | 4              | hs         | nn       |
| d1                  | 1.000          | PROCESSING |          |
| nt                  | 32             | lb         | 0.10     |
| ct                  | 32             | fn         | 65536    |
| TRANSMITTER         | H1             | DISPLAY    |          |
| tn                  |                | sp         | -171.8   |
| sfrq                | 399.853        | wp         | 3568.4   |
| tof                 | 362.8          | rfl        | 801.5    |
| tpwr                | 57             | rffp       | 0        |
| pw                  | 9.850          | rp         | 119.8    |
| DECOUPLER           | 1p             |            | -91.4    |
| dn                  | C13            | PLOT       |          |
| dof                 | 0              | wc         | 250      |
| dm                  | nnn            | sc         | 0        |
| dmm                 | c              | vs         | 69       |
| dpwr                | 50             | th         | 42       |
| dmf                 | 15900          | nm         | cdc ph   |

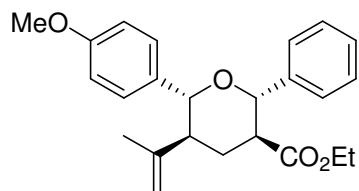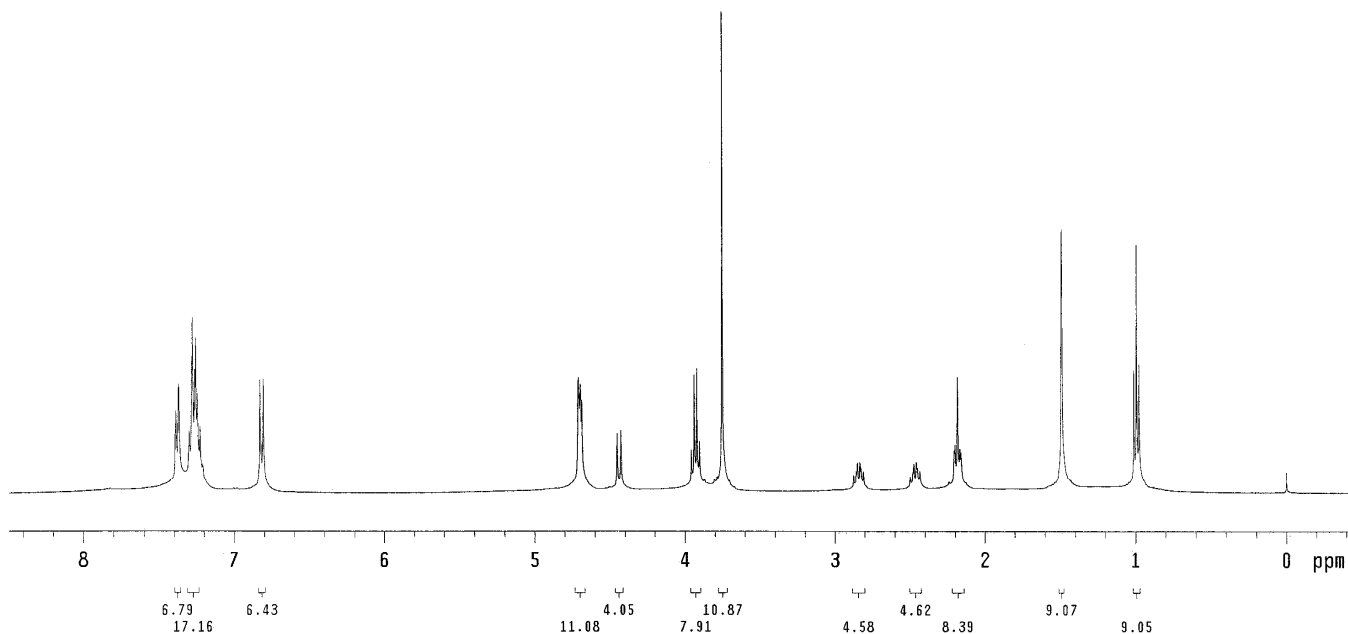



### <sup>13</sup>C NMR spectra of 11c

PS\_494\_M

exp1 s2pu1

| SAMPLE      |            | SPECIAL    |          |
|-------------|------------|------------|----------|
| date        | Jun 9 2011 | temp       | not used |
| solvent     | CDCl3      | gain       | not used |
| file        | exp        | spin       | not used |
| ACQUISITION |            | hst        | 0.008    |
| sw          | 25125.6    | pw90       | 18.600   |
| at          | 1.199      | alfa       | 20.000   |
| np          | 60270      | FLAGS      |          |
| fb          | 13800      | fl         | n        |
| bs          | 16         | in         | n        |
| d1          | 1.000      | dp         | y        |
| nt          | 4000       | hs         | nn       |
| ct          | 1552       | PROCESSING |          |
| tn          | C13        | lb         | 2.00     |
| sfrq        | 100.554    | fn         | 65536    |
| tof         | 1536.3     | sp         | -551.8   |
| tpwr        | 61         | wp         | 21328.5  |
| pw          | 9.300      | rfl        | 9273.6   |
| DECOUPLER   |            | rffp       | 7764.9   |
| dn          | H1         | rp         | -47.4    |
| dof         | 0          | lp         | -349.1   |
| dm          | yyy        | PLOT       |          |
| dmm         | w          | wc         | 250      |
| dpwr        | 42         | sc         | 0        |
| dmf         | 8900       | vs         | 24       |
|             |            | th         | 3        |
|             |            | nm         | no ph    |

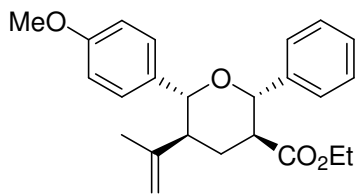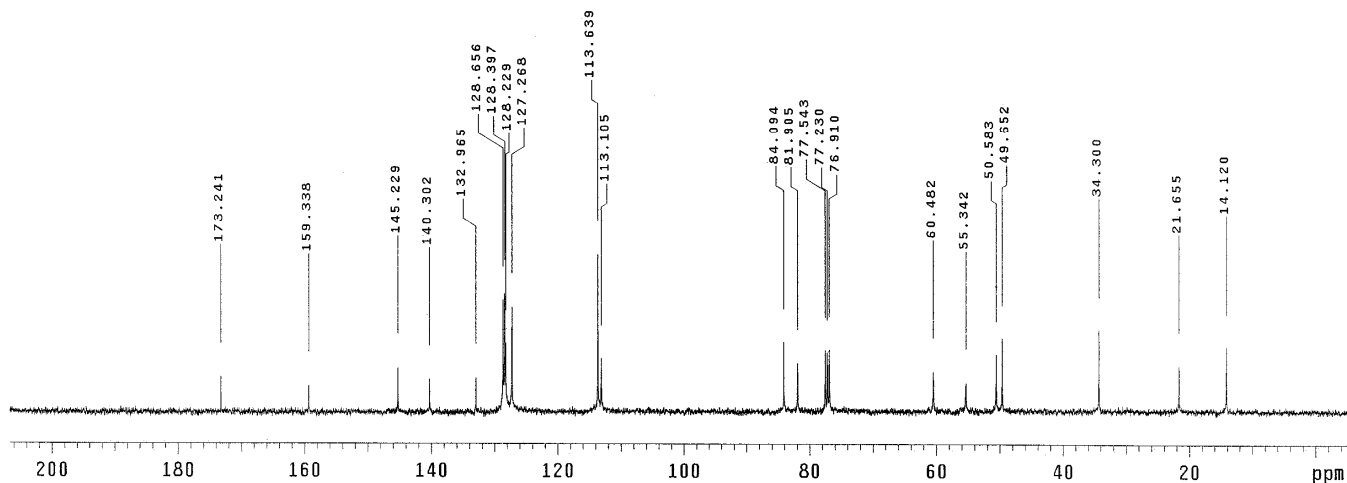

### <sup>1</sup>H NMR spectra of 11d

PS\_435\_M

exp1 s2pu1

| SAMPLE              |             | SPECIAL    |              |
|---------------------|-------------|------------|--------------|
| date                | Sep 12 2011 | temp       | not used     |
| solvent             | CDCl3       | gain       | not used     |
| file /export/home/~ |             | spin       | not used     |
| ciftemp/AKS_PS_435~ |             | hst        | 0.008        |
| M1_Pdt.fid          |             | pw90       | 19.700       |
| ACQUISITION         |             | alfa       | 20.000       |
| ACQUISITION         |             | FLAGS      |              |
| sw                  | 6389.8      | il         | n            |
| at                  | 1.998       | in         | n            |
| np                  | 25528       | dp         | y            |
| fb                  | not used    | hs         | nn           |
| bs                  | 8           | PROCESSING |              |
| d1                  | 1.000       | lb         | 0.10         |
| nt                  | 300         | fn         | 65536        |
| ct                  | 256         | DISPLAY    |              |
| TRANSMITTER         |             | tn         | H1 sp -224.5 |
| sfrq                | 399.853     | wp         | 3652.5       |
| tof                 | 362.8       | rfl        | 795.2        |
| tpwr                | 57          | rfp        | 0            |
| pw                  | 9.850       | rp         | 119.0        |
| DECOUPLER           |             | lp         | -88.5        |
| dn                  | C13         | PLOT       |              |
| dof                 | 0           | wc         | 250          |
| dm                  | ^nn         | sc         | 0            |
| dmm                 | c           | vs         | 49           |
| dpwt                | 50          | th         | 11           |
| dmf                 | 15900       | nm         | cdc ph       |

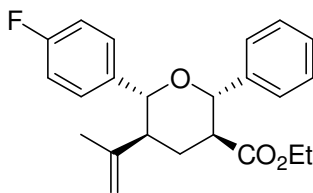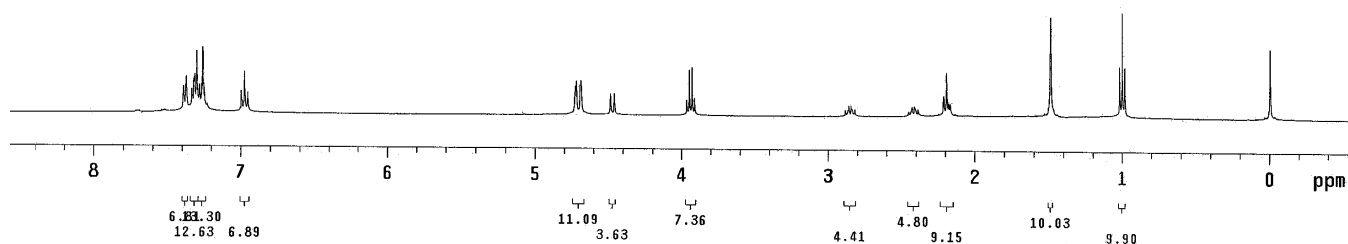

### <sup>13</sup>C NMR spectra of 11d

PS\_435\_M

exp1 s2pu1

| SAMPLE             |                | SPECIAL    |          |
|--------------------|----------------|------------|----------|
| date               | Jan 24 2011    | temp       | not used |
| solvent            | CDCl3          | gain       | not used |
| file               | /export/home/~ | spin       | not used |
| ciftemp/AKS_PS_435 | hst            | 0.008      |          |
| M1_C13.fid         | pw90           | 18.600     |          |
| ACQUISITION        | alfa           | 20.000     |          |
| sw                 | 25125.6        | FLAGS      |          |
| at                 | 1.199          | il         | n        |
| np                 | 60270          | in         | n        |
| fb                 | 13800          | dp         | y        |
| bs                 | 16             | hs         | nn       |
| d1                 | 1.000          | PROCESSING |          |
| nt                 | 5000           | lb         | 2.00     |
| ct                 | 3776           | fn         | 65536    |
| TRANSMITTER        | C13            | DISPLAY    |          |
| tn                 | -285.7         |            |          |
| sfrq               | 100.554        | wp         | 20889.0  |
| tof                | 1536.3         | rfl        | 9272.1   |
| tpwr               | 61             | rfd        | 7764.9   |
| pw                 | 9.300          | rp         | -48.7    |
| DECOUPLER          | lp             |            | -332.1   |
| dn                 | H1             | PLOT       |          |
| dof                | 0              | wc         | 250      |
| dm                 | yyy            | sc         | 0        |
| dmm                | w              | vs         | 49       |
| dpwr               | 42             | th         | 3        |
| dmf                | 8900           | nm         | no ph    |

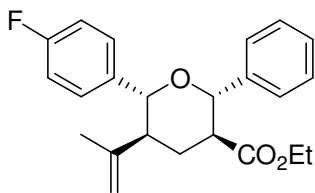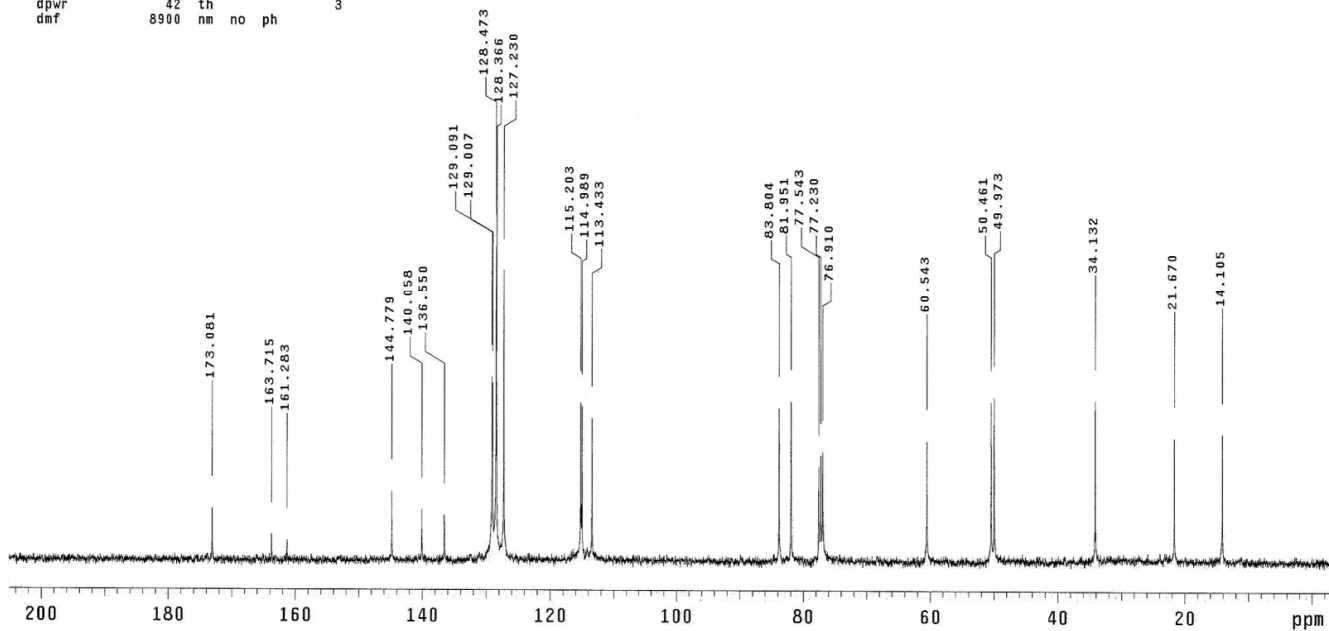

### <sup>19</sup>F NMR spectra of 11d

PS\_453M\_Fluprine

exp1 s2pu1

| SAMPLE      |            | SPECIAL    |          |
|-------------|------------|------------|----------|
| date        | Apr 4 2011 | temp       | not used |
| solvent     | CDC13      | gain       | not used |
| file        |            | sp1n       | not used |
| ACQUISITION |            | hst        | 0.008    |
| sw          | 100000.0   | pw90       | 15.600   |
| at          | 0.600      | alfa       | 90.000   |
| np          | 119936     | FLAGS      |          |
| fb          | 55000      | il         | n        |
| bs          | 16         | in         | n        |
| dl          | 1.500      | dp         | y        |
| nt          | 64         | hs         | nn       |
| ct          | 64         | PROCESSING |          |
| TRANSMITTER |            | lb         | 0.30     |
| tn          | F19        | lsfid      | -10      |
| sfrq        | 376.236    | fn         | not used |
| tof         | 40099.4    | DISPLAY    |          |
| tpwr        | 58         | sp         | -85986.1 |
| pw          | 5.200      | wp         | 91326.8  |
| DECOUPLER   |            | rf1        | 89007.4  |
| dn          | H1         | rfl        | 0        |
| dof         | 0          | rp         | -119.6   |
| dm          | nnn        | lp         | -9.0     |
| dmm         | c          | PLOT       |          |
| dpwr        | 42         | wc         | 250      |
| dmf         | 8900       | sc         | 0        |
|             |            | vs         | 11       |
|             |            | th         | 5        |
|             |            | ai         | no ph    |

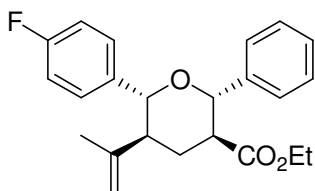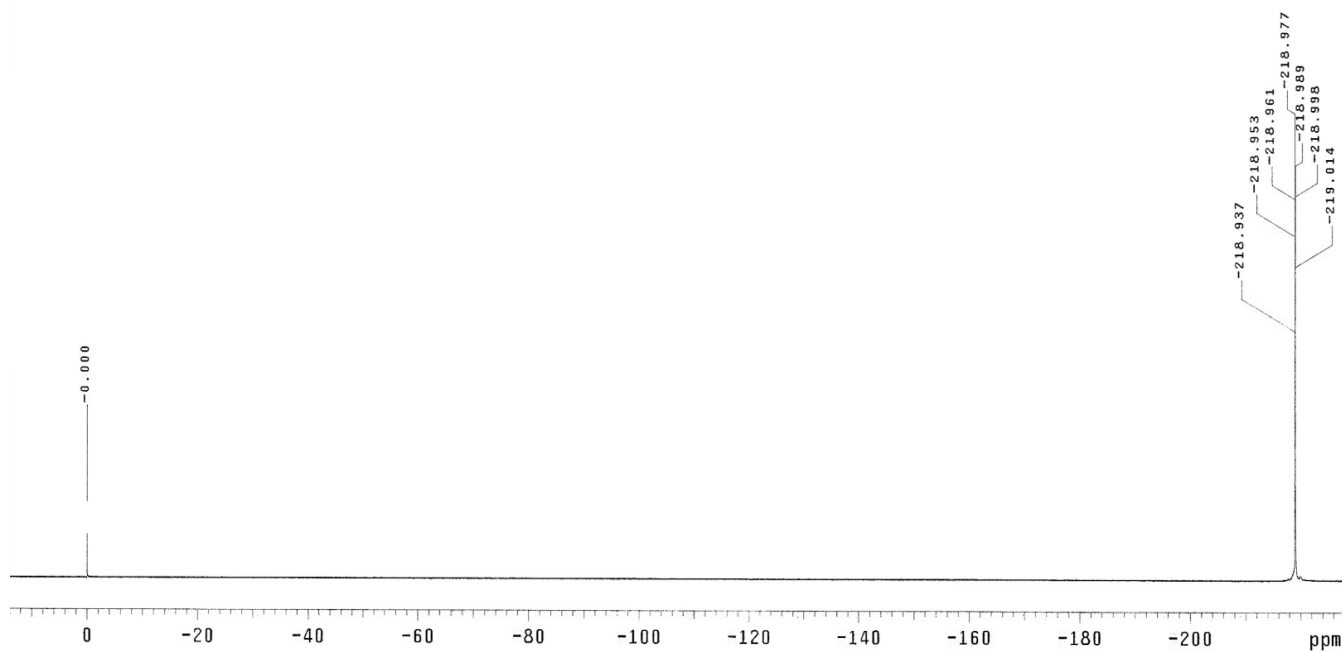

### <sup>1</sup>H NMR spectra of 11e

```
PS_450_M
expl s2pu1
SAMPLE
date Feb 20 2011 temp not used
solvent CDCl3 gain not used
file /export/home/~ spin not used
ciftemp/AKS_PS_450~ hst 0.008
_M.fid pw90 19.700
ACQUISITION alfa 20.000
sw 6389.8 FLAGS
at 1.998 f1 n
np 25528 in n
fb not used dp y
bs 8 hs nn
d1 1.000 PROCESSING
nt 200 lb 0.10
ct 0 fn 65536
TRANSMITTER H1 sp DISPLAY
tn -146.6
sfrq 399.853 wp 3635.7
tof 382.8 rfl 793.1
tpwr 57 rfp 0
pw 9.850 rp 109.0
DECOUPLER lp -81.3
dn C13 PLOT
dof 0 wc 250
dm nnn sc 0
dmm c vs 42
dpwr 50 th 20
dmf 15900 nm cdc ph
```

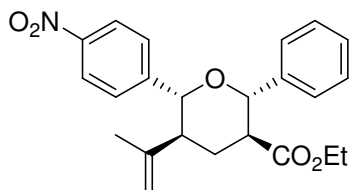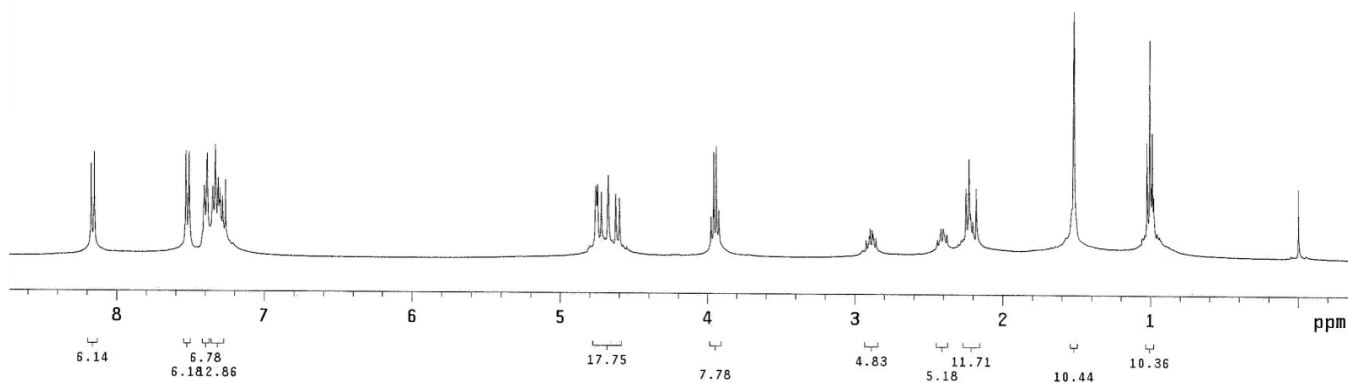

### <sup>13</sup>C NMR spectra of 11e

PS\_450\_M

exp1 s2pu1

| SAMPLE      |                | SPECIAL    |          |
|-------------|----------------|------------|----------|
| date        | Feb 20 2011    | temp       | not used |
| solvent     | CDCl3          | gain       | not used |
| file        | /export/home/~ | spin       | not used |
| ciftemp     | AKS_PS_450~    | hst        | 0.008    |
|             | M_C13.fid      | pw90       | 18.600   |
| ACQUISITION | alfa           |            | 20.000   |
| sw          | 25125.6        | FLAGS      |          |
| at          | 1.199          | il         | n        |
| np          | 60270          | in         | n        |
| fb          | 13800          | dp         | y        |
| bs          | 16             | hs         | nn       |
| d1          | 1.000          | PROCESSING |          |
| nt          | 5000           | lb         | 2.00     |
| ct          | 0              | fn         | 65536    |
| TRANSMITTER |                | DISPLAY    |          |
| tn          | C13            | sp         | -384.6   |
| sfrq        | 100.554        | wp         | 21030.9  |
| tof         | 1536.3         | rfl        | 9271.3   |
| tpwr        | 61             | rpf        | 7764.9   |
| pw          | 9.300          | rp         | -57.6    |
| DECOUPLER   |                | lp         | -312.0   |
| dn          | H1             | PLOT       |          |
| dof         | 0              | wc         | 250      |
| dm          | yyy            | sc         | 0        |
| dmm         | w              | vs         | 31       |
| dpwr        | 42             | th         | 2        |
| dmf         | 8900           | nm         | no ph    |

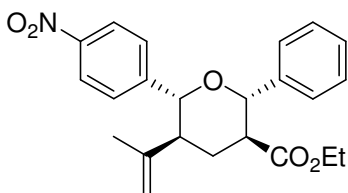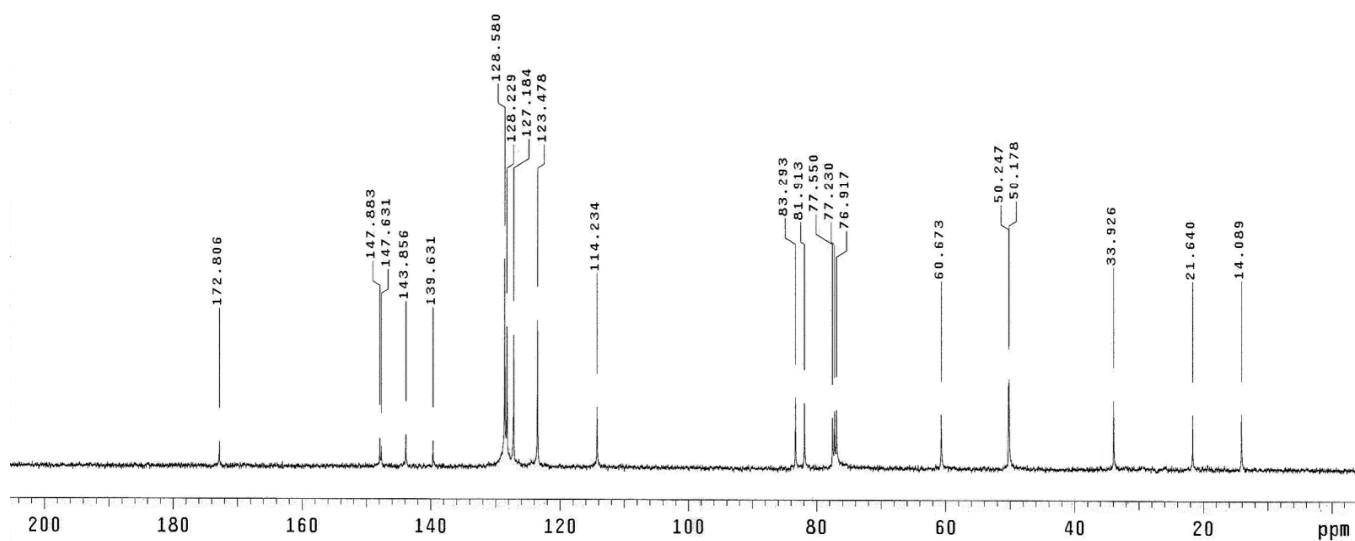

### <sup>1</sup>H NMR spectra of 11f

```
PS_418_U
exp1 s2pu1
SAMPLE
date Sep 8 2011 temp not used
solvent CDCl3 gain not used
file exp spin not used
ACQUISITION hst 0.008
sw 6389.8 pw90 19.700
at 1.998 alfa 20.000
np 25528
fb not used il FLAGS n
bs 8 in n
dl 1.000 dp y
nt 200 hs nn
ct 144 PROCESSING
TRANSMITTER lb 0.10
tn H1 fn 65536
sfrq 399.853 DISPLAY
tof 362.8 sp -206.9
tpwr 57 wp 3686.0
pw 9.850 rfi 794.7
DECOUPLER rfp 0
dn C13 rp 124.3
dof 0 lp -82.2
dm nnn PLOT
dmm c wc 250
dpwr 50 sc 0
dmf 15900 vs 28
nm th 20
cdc ph
```

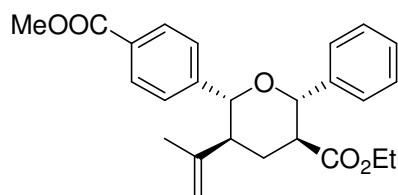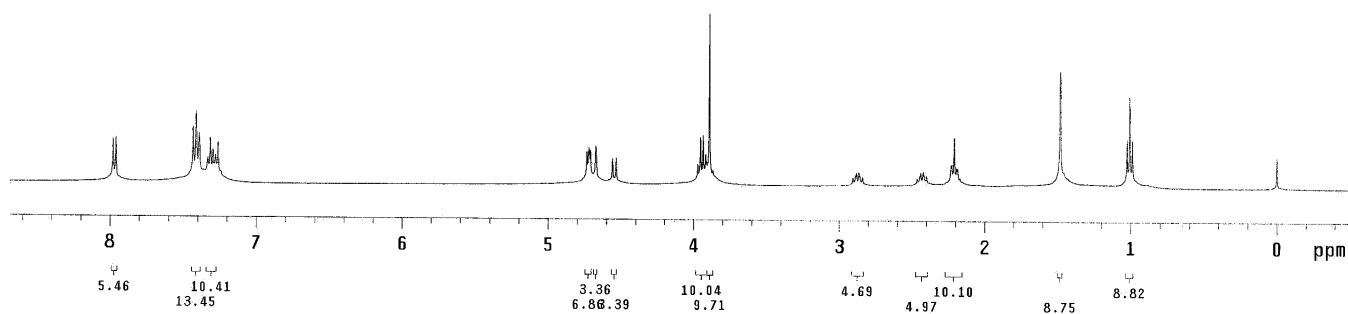

### <sup>13</sup>C NMR spectra of 11f

PS\_418\_U

exp1 s2pu1

| SAMPLE      |             | SPECIAL    |          |
|-------------|-------------|------------|----------|
| date        | Mar 20 2011 | temp       | not used |
| solvent     | CDCl3       | gain       | not used |
| file        |             | spin       | not used |
| ACQUISITION |             | hst        | 0.008    |
| sw          | 25125.6     | pw90       | 18.600   |
| at          | 1.199       | alfa       | 20.000   |
| np          | 60270       | FLAGS      |          |
| fb          | 13800       | il         | n        |
| bs          | 16          | in         | n        |
| d1          | 1.000       | dp         | y        |
| nt          | 4000        | hs         | nn       |
| ct          | 576         | PROCESSING |          |
| tn          |             | lb         | 2.00     |
| sfrq        | 100.625     | fn         | 65536    |
| tof         | 1536.3      | sp         | -430.6   |
| tpwr        | 61          | wp         | 21063.9  |
| pw          | 9.300       | rfl        | 9284.4   |
| DECOUPLER   |             | rff        | 7764.9   |
| dn          | H1          | rp         | -38.2    |
| dof         | 0           | lp         | -336.3   |
| dm          | yyy         | PLOT       |          |
| dmm         | w           | wc         | 250      |
| dpwr        | 42          | sc         | 0        |
| dmf         | 8900        | vs         | 40       |
|             |             | th         | 3        |
|             |             | nm         | no ph    |

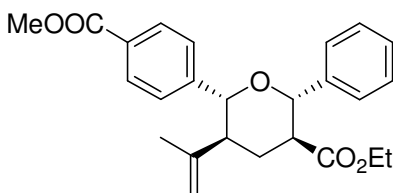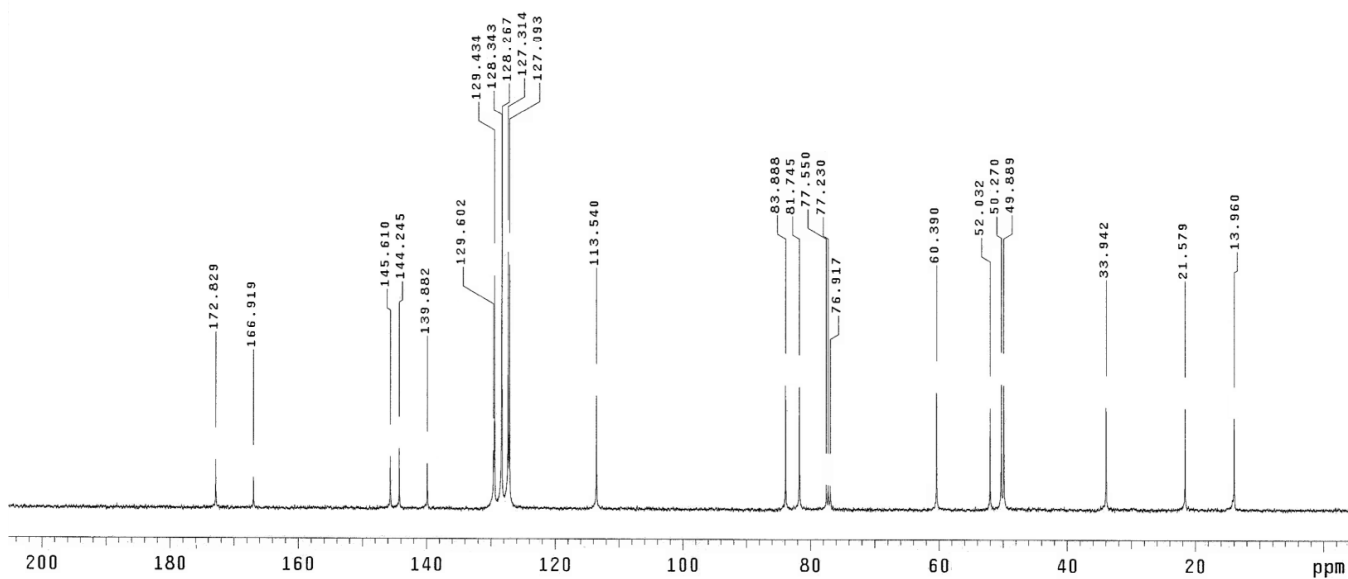



### <sup>1</sup>H NMR spectra of 11g

PS\_424\_M

exp1 s2pu1

| SAMPLE             |                | SPECIAL    |          |
|--------------------|----------------|------------|----------|
| date               | Jan 5 2011     | temp       | not used |
| solvent            | CDCl3          | gain       | not used |
| file               | /export/home/~ | spin       | not used |
| ciftemp/AKS_PS_424 |                | hst        | 0.008    |
|                    | _M.fid         | pw90       | 19.700   |
|                    |                | alfa       | 20.000   |
| ACQUISITION        |                | FLAGS      |          |
| sw                 | 6389.8         |            |          |
| at                 | 1.998          | il         | n        |
| np                 | 25528          | in         | n        |
| fb                 | not used       | dp         | y        |
| bs                 | 8              | hs         | nn       |
| d1                 | 1.000          | PROCESSING |          |
| nt                 | 100            | lb         | 0.10     |
| ct                 | 100            | fn         | 65536    |
| TRANSMITTER        |                | DISPLAY    |          |
| tn                 | H1             | sp         | -188.6   |
| sfrq               | 399.853        | wp         | 3568.4   |
| tof                | 362.8          | rfl        | 793.1    |
| tpwr               | 57             | rff        | 0        |
| pw                 | 9.850          | rp         | 103.0    |
|                    |                | lp         | -90.3    |
| DECOUPLER          |                | PLOT       |          |
| dn                 | C13            |            |          |
| dof                | 0              | wc         | 250      |
| dm                 | nnn            | sc         | 0        |
| dmm                | c              | vs         | 39       |
| dpwr               | 50             | th         | 20       |
| dmf                | 15900          | nm         | cdc ph   |

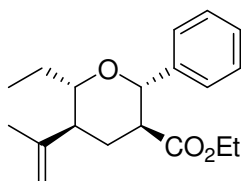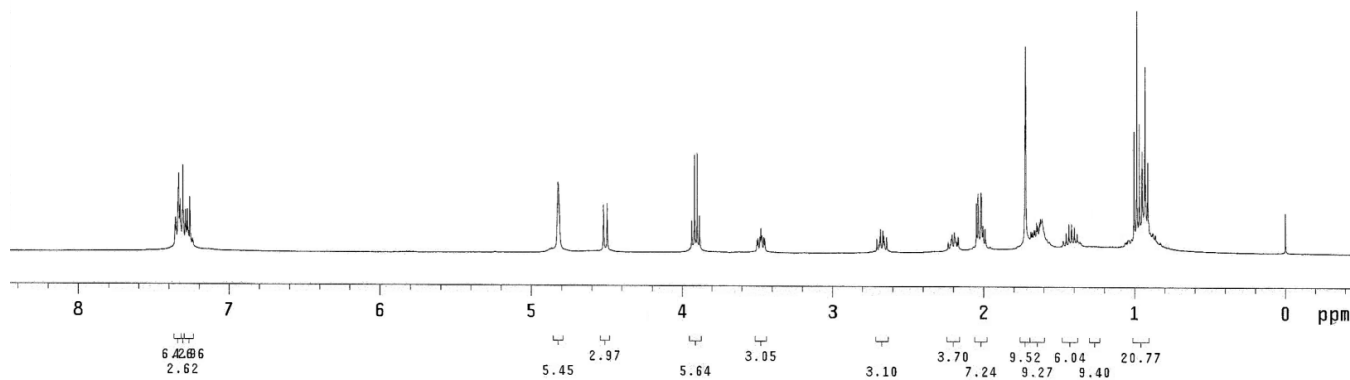

### <sup>13</sup>C NMR spectra of 11g

```
PS_424_M
exp1 s2pu1

SAMPLE
date Jan 5 2011 temp not used
solvent CDCl3 gain not used
file /export/home/~ spin not used
ciftemp/AKS_PS_424~ hst 0.008
M_C13.fid pw90 18.600
ACQUISITION alfa 20.000
sw 25125.6
at 1.199 i1
np 60270 in
fb 13800 dp
bs 16 hs
d1 1.000
nt 4000 lb
ct 1120 fn

SPECIAL
FLAGS
PROCESSING
DISPLAY
TRANSMITTER
DISPLAY
DECOUPLER
PLOT

dn H1
dof 0
dm yyy
dmm w
dpwr 42
dmf 8900

no ph
wc 250
sc 0
vs 26
th 3
```

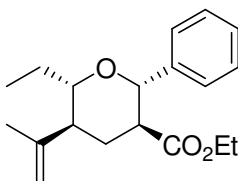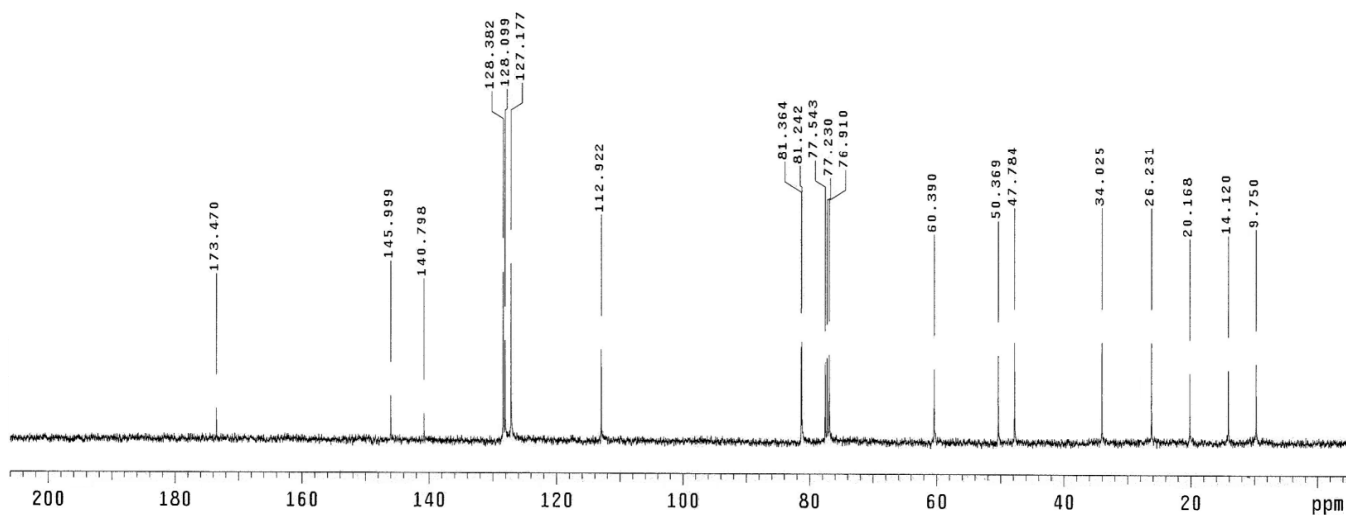

## <sup>1</sup>H NMR spectra of 11h

PS\_409\_M

exp1 s2pu1

| SAMPLE      |                | SPECIAL    |          |
|-------------|----------------|------------|----------|
| date        | Dec 22 2010    | temp       | not used |
| solvent     | CDCl3          | gain       | not used |
| file        | /export/home/~ | spin       | not used |
| ciftemp     | AKS_PS_409~    | hst        | 0.008    |
|             | M1.fid         | pw90       | 19.700   |
| ACQUISITION |                | alfa       | 20.000   |
| FLAGS       |                |            |          |
| sw          | 6389.8         |            |          |
| at          | 1.998          | fl         | n        |
| np          | 25528          | in         | n        |
| fb          | not used       | dp         | y        |
| bs          | 8              | hs         | nn       |
| d1          | 1.000          | PROCESSING |          |
| nt          | 100            | lb         | 0.10     |
| ct          | 100            | fn         | 65536    |
| TRANSMITTER |                | DISPLAY    |          |
| tn          | H1             | sp         | -166.3   |
| sfrq        | 399.853        | wp         | 3543.3   |
| tof         | 362.8          | rf         | 796.0    |
| tpwr        | 57             | rfp        | 0        |
| pw          | 9.850          | rp         | 124.9    |
| DECOUPLER   |                | lp         | -87.5    |
| PLOT        |                |            |          |
| dn          | C13            |            |          |
| dof         | 0              | wc         | 250      |
| dm          | nnn            | sc         | 0        |
| dmm         | c              | vs         | 28       |
| dpwr        | 50             | th         | 42       |
| dmf         | 15900          | nm         | cdc ph   |

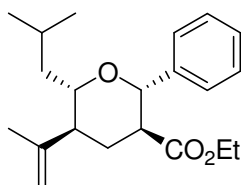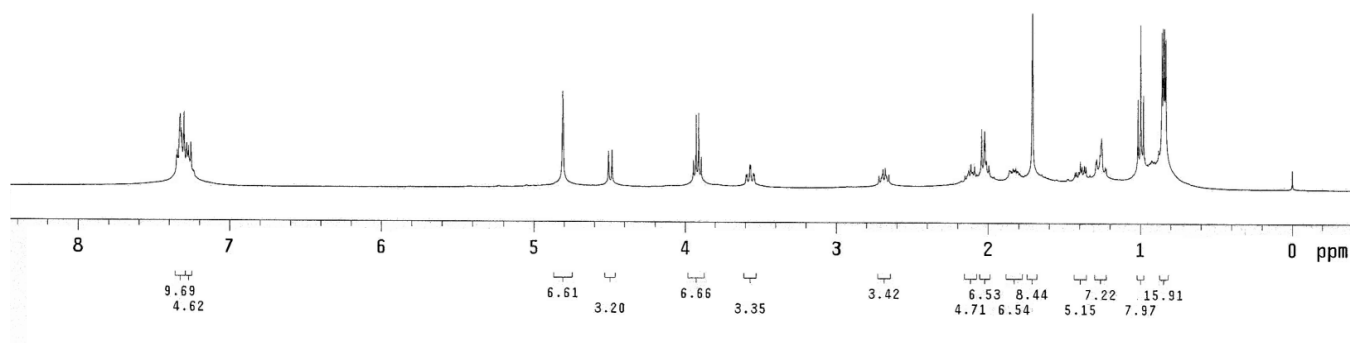

### <sup>13</sup>C NMR spectra of 11h

```
PS_409_M
exp1 s2pu1
SAMPLE
date Dec 21 2010 temp not used
solvent CDCl3 gain not used
file /export/home/~ spin not used
ciftemp/AKS_PS_409~ hst 0.008
M_C13.fid pw90 18.600
ACQUISITION alfa 20.000
sw 25125.6 FLAGS
at 1.199 i1 n
np 60270 in n
fb 13800 dp y
bs 16 hs nn
dl 1.000 PROCESSING
nt 2000 lb 2.00
ct 560 fn 65536
TRANSMITTER C13 sp DISPLAY
tn 100.554 wp -487.4
sfrq 1536.3 rfl 21030.9
tof 61 rfp 9275.2
tpwr 9.300 rp 7764.9
pw 61 rfp -47.4
DECOUPLER H1 lp -341.6
dn 0 wc PLOT
dof 0 wc 250
dm vvy sc 0
dmm w vs 26
dpwr 42 th 3
dmf 8900 nm no ph
```

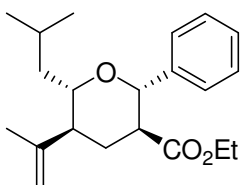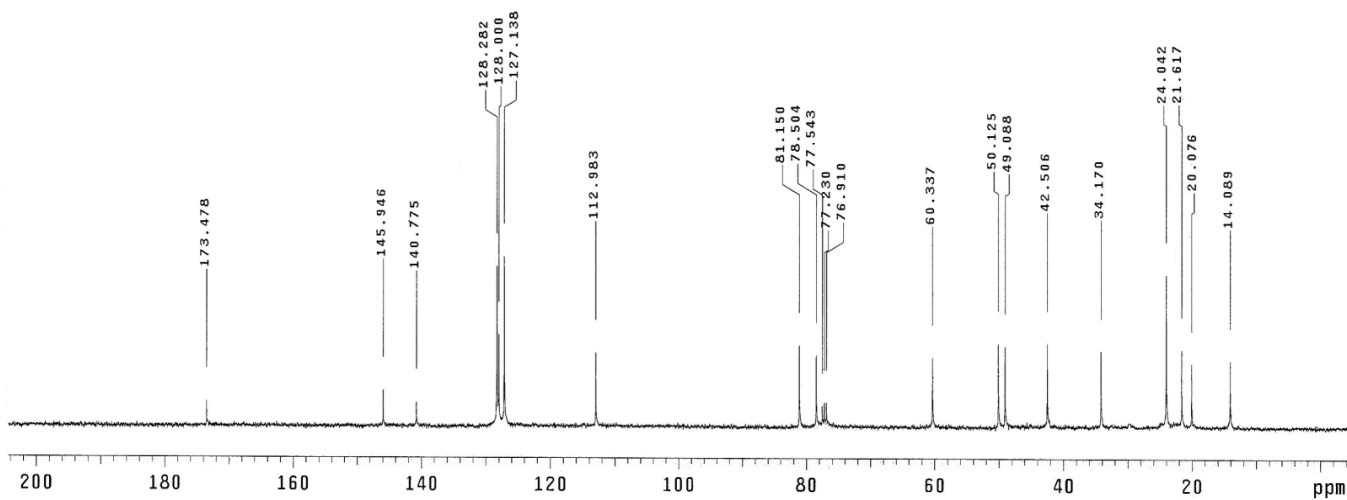

### <sup>1</sup>H NMR spectra of 12a

```
PS_421_M
expl s2pu1
SAMPLE
date Jan 3 2011 temp not used
solvent CDCl3 gain not used
file /export/home/~ spin not used
ciftemp/AKS_PS_421~ hst 0.008
_M.fid pw90 19.700
ACQUISITION alfa 20.000
sw 6389.8
at 1.998 i1
np 25528 in
fb not used dp
bs 8 hs
d1 1.000 PROCESSING
nt 100 ib 0.10
ct 100 fn 65536
TRANSMITTER H1 sp
tn H1 sp -162.8
sfrq 399.853 wp 3518.1
tof 362.8 rfl 800.9
tpwr 57 rfp 0
pw 9.850 rp 109.8
DECOUPLER C13 lp -94.8
dn C13 PLOT
dof 0 wc 250
dm nnn sc 0
dmm c vs 36
dpwr 50 th 20
dmf 15900 nm cdc ph
```

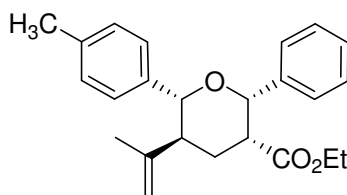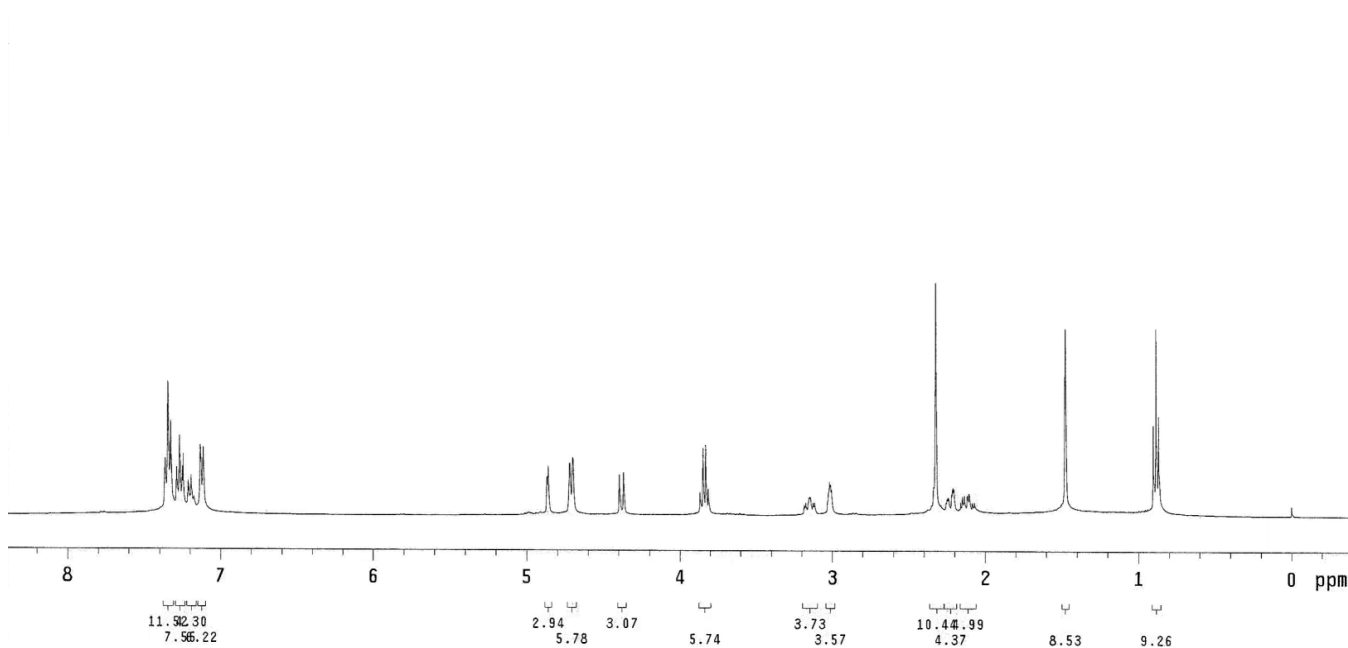

### <sup>13</sup>C NMR spectra of 12a

```
PS_421_M
exp1 s2pu1
SAMPLE
date Jan 2 2011 temp not used
solvent CDCl3 gain not used
file /export/home/~ spin not used
ciftemp/AKS_PS_421~ hst 0.008
M_C13.fid pw90 18.600
ACQUISITION alfa 20.000
sw 25125.6 FLAGS
at 1.199 il n
np 60270 in n
fb 13800 dp y
bs 16 hs nn
d1 1.000 PROCESSING
nt 3000 lb 2.00
ct 3000 fn 65536
TRANSMITTER DISPLAY
tn C13 sp -353.2
sfrq 100.554 wp 20965.0
tof 1536.3 rfl 9273.6
tpwr 61 rfp 7764.9
pw 9.300 rp -64.5
DECOUPLER lp -286.4
dn H1 PLOT
dbf 0 wc 250
dm yvy sc 0
dmm w vs 23
dpwr 42 th 2
dmf 8900 nm no ph
```

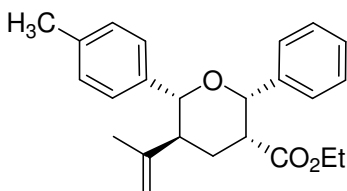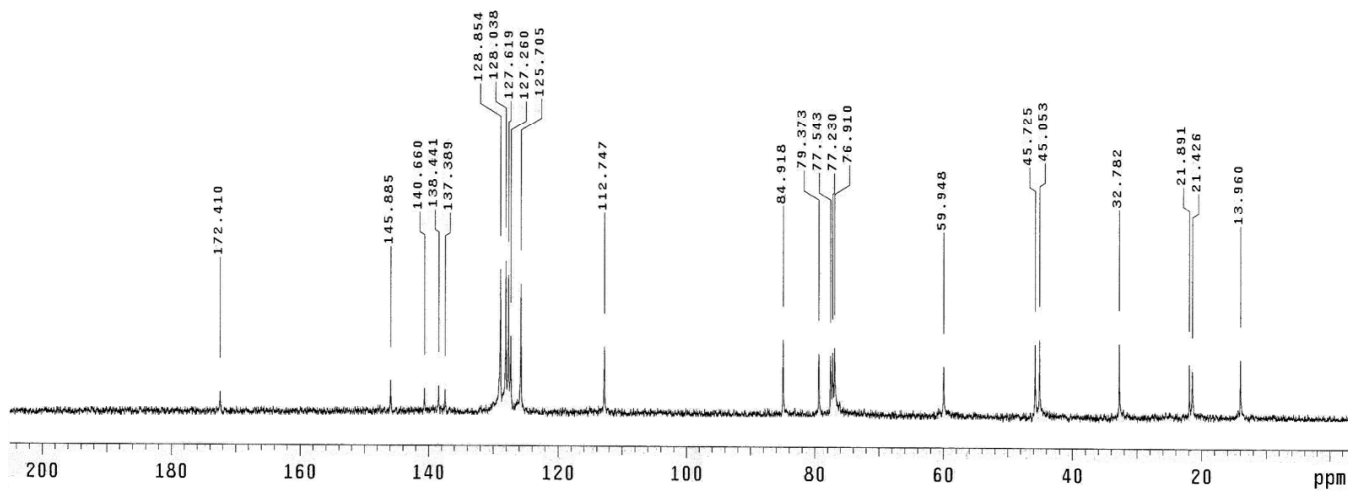

### <sup>1</sup>H NMR spectra of 12b

PS\_432\_M

exp1 s2pu1

|             |                |            |          |
|-------------|----------------|------------|----------|
| SAMPLE      |                | SPECIAL    |          |
| date        | Jan 14 2011    | temp       | not used |
| solvent     | CDCl3          | gain       | not used |
| file        | /export/home/~ | spin       | not used |
| ciftemp     | AKS_PS_432~    | hst        | 0.008    |
|             | .M.fid         | pw90       | 19.700   |
|             |                | alfa       | 20.000   |
| ACQUISITION |                | FLAGS      |          |
| sw          | 6389.8         |            |          |
| at          | 1.998          | f1         | n        |
| np          | 25528          | in         | n        |
| fb          | not used       | dp         | y        |
| bs          | 8              | hs         | nn       |
| d1          | 1.000          | PROCESSING |          |
| nt          | 100            | lb         | 0.10     |
| ct          | 100            | fn         | 65536    |
| TRANSMITTER |                | DISPLAY    |          |
| tn          | H1             | sp         | -116.8   |
| sfrq        | 399.853        | wp         | 3509.7   |
| tof         | 362.8          | rfl        | 796.8    |
| tpwr        | 57             | rfp        | 0        |
| pw          | 9.850          | rp         | 109.7    |
|             |                | lp         | -99.5    |
| DECOUPLER   |                | PLOT       |          |
| dn          | C13            |            |          |
| dof         | 0              | wc         | 250      |
| dm          | nnn            | sc         | 0        |
| dmm         | c              | vs         | 29       |
| dpwr        | 50             | th         | 18       |
| dmf         | 15900          | nm         | cdc ph   |

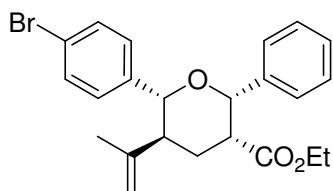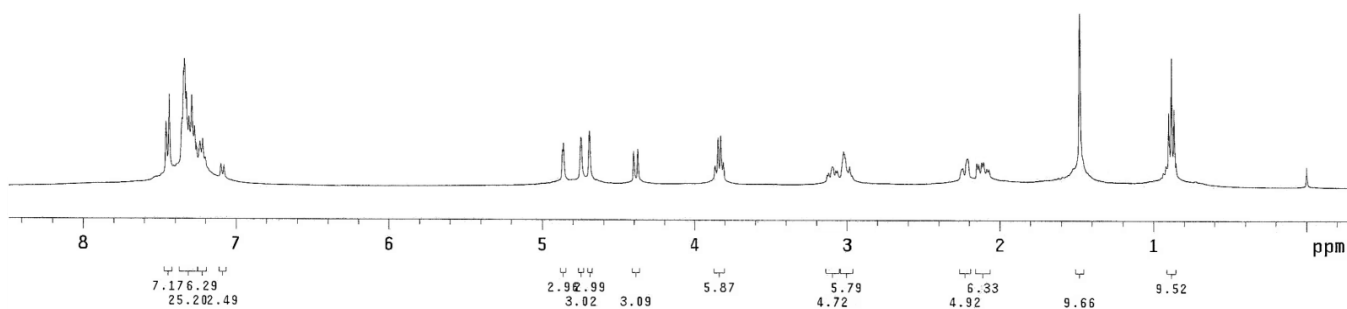

### <sup>13</sup>C NMR spectra of 12b

PS\_432\_M

exp1 s2pu1

| SAMPLE              |                | SPECIAL    |          |
|---------------------|----------------|------------|----------|
| date                | Jan 14 2011    | temp       | not used |
| solvent             | CDCl3          | gain       | not used |
| file                | /export/home/~ | spin       | not used |
| ciftemp/AKS_PS_432- |                | hst        | 0.008    |
| M_C13.fid           |                | pw90       | 18.600   |
| ACQUISITION         | alfa           |            | 20.000   |
| sw                  | 25125.6        | FLAGS      |          |
| at                  | 1.199          | il         | n        |
| np                  | 60270          | in         | n        |
| fb                  | 13800          | dp         | y        |
| bs                  | 16             | hs         | nn       |
| d1                  | 1.000          | PROCESSING |          |
| nt                  | 4000           | lb         | 2.00     |
| ct                  | 1168           | fn         | 65536    |
| TRANSMITTER         | C13            | DISPLAY    |          |
| tn                  |                | sp         | -423.0   |
| sfrq                | 100.554        | wp         | 20899.0  |
| tof                 | 1536.3         | rfl        | 9276.7   |
| tpwr                | 61             | rfp        | 7764.9   |
| pw                  | 9.300          | rp         | -56.2    |
| DECOUPLER           | H1             | lp         | -292.1   |
| dn                  |                | PLOT       |          |
| dof                 | 0              | wc         | 250      |
| dm                  | yyy            | sc         | 0        |
| dmm                 | w              | vs         | 37       |
| dpwr                | 42             | th         | 4        |
| dmf                 | 8900           | nm         | no ph    |

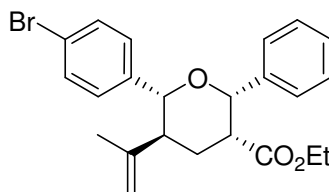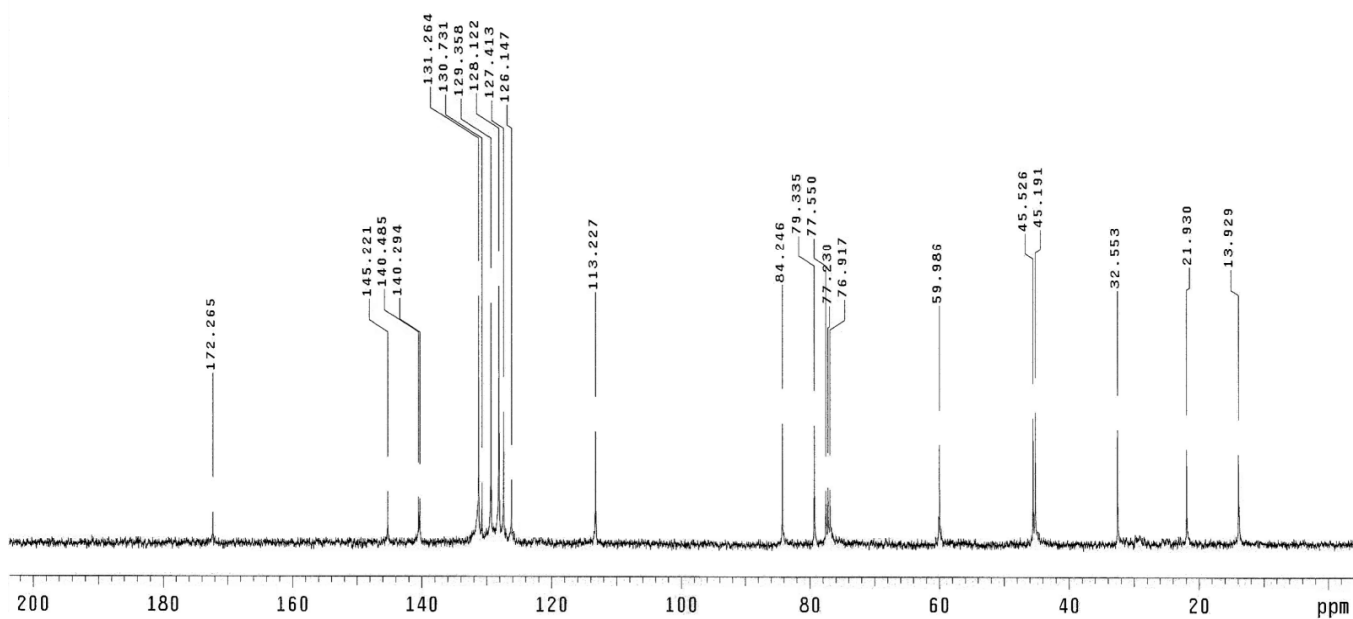



### <sup>1</sup>H NMR spectra of 12c

PS\_434\_M

expl s2pu1

| SAMPLE              |                | SPECIAL    |          |
|---------------------|----------------|------------|----------|
| date                | Jan 15 2011    | temp       | not used |
| solvent             | CDCl3          | gain       | not used |
| file                | /export/home/~ | spin       | not used |
| ciftemp/AKS_PS_434~ | hst            |            | 0.008    |
|                     | M.fid          | pw90       | 19.700   |
| ACQUISITION         | alfa           |            | 20.000   |
| sw                  | 6389.8         | FLAGS      |          |
| at                  | 1.998          | il         | n        |
| np                  | 25528          | in         | n        |
| fb                  | not used       | dp         | y        |
| bs                  | 8              | hs         | nn       |
| d1                  | 1.000          | PROCESSING |          |
| nt                  | 100            | lb         | 0.10     |
| ct                  | 100            | fn         | 65536    |
| TRANSMITTER         |                | DISPLAY    |          |
| tn                  | H1             | sp         | -209.6   |
| sfrq                | 399.853        | wp         | 3568.4   |
| tof                 | 362.8          | rfl        | 797.4    |
| tpwr                | 57             | rfp        | 0        |
| pw                  | 9.850          | rp         | 115.2    |
|                     |                | lp         | -109.8   |
| DECOUPLER           |                | PLOT       |          |
| dn                  | C13            |            |          |
| dof                 | 0              | wc         | 250      |
| dm                  | nnn            | sc         | 0        |
| dmm                 | c              | vs         | 42       |
| dpwr                | 50             | th         | 20       |
| dmf                 | 15900          | nm         | cdc ph   |

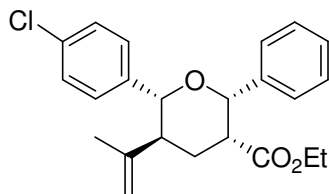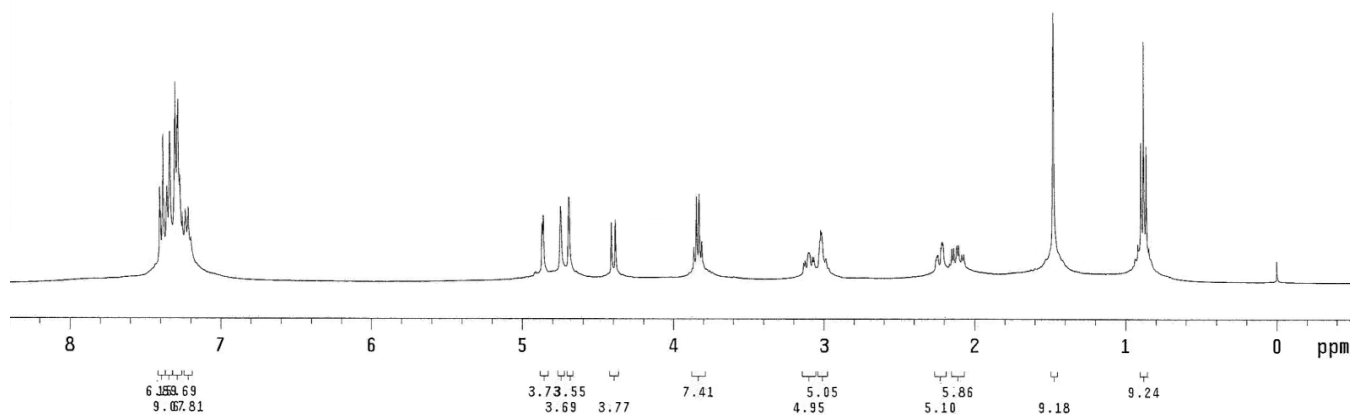

### <sup>13</sup>C NMR spectra of 12c

PS\_434\_M

expl s2pu1

| SAMPLE      |                | SPECIAL    |          |
|-------------|----------------|------------|----------|
| date        | Jan 15 2011    | temp       | not used |
| solvent     | CDC13          | gain       | not used |
| file        | /export/home/~ | spin       | not used |
| ciftemp     | AKS_PS_434~    | hst        | 0.008    |
|             | M_C13.fid      | pw90       | 18.600   |
| ACQUISITION | alfa           |            | 20.000   |
| sw          | 25125.6        | FLAGS      |          |
| at          | 1.199          | il         | n        |
| np          | 60270          | in         | n        |
| fb          | 13800          | dp         | y        |
| bs          | 16             | hs         | nn       |
| d1          | 1.000          | PROCESSING |          |
| nt          | 8000           | lb         | 2.00     |
| ct          | 2592           | fn         | 65536    |
| TRANSMITTER |                | DISPLAY    |          |
| tn          | C13            | sp         | -590.1   |
| sfrq        | 100.554        | wp         | 21328.5  |
| tof         | 1536.3         | rfl        | 9279.0   |
| tpwr        | 61             | rfp        | 7764.9   |
| pw          | 9.300          | rp         | -50.9    |
| DECOUPLER   |                | lp         | -302.4   |
| dn          | H1             | PLOT       |          |
| dof         | 0              | wc         | 250      |
| dm          | yyy            | sc         | 0        |
| dmm         | w              | vs         | 37       |
| dpwr        | 42             | th         | 4        |
| dmf         | 8900           | nm         | no       |
|             |                | ph         |          |

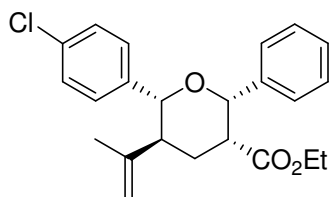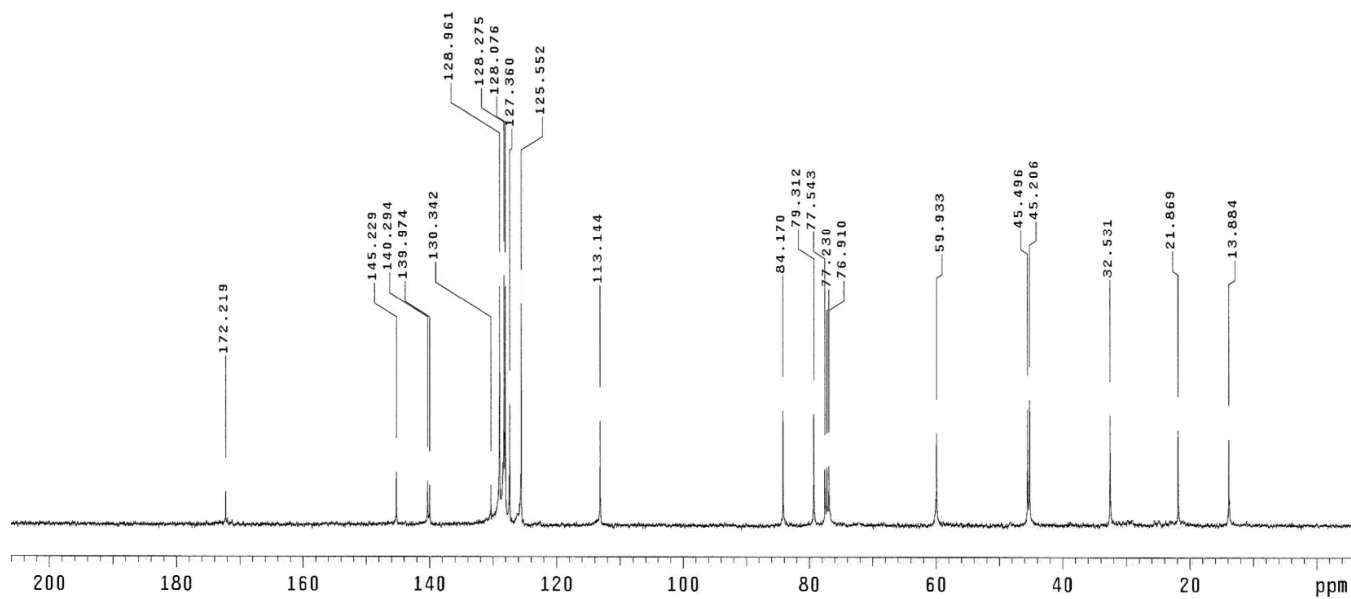

## <sup>1</sup>H NMR spectra of 12d

PS\_493\_M

exp1 s2pu1

| SAMPLE      |            | SPECIAL    |          |
|-------------|------------|------------|----------|
| date        | Jun 6 2011 | temp       | not used |
| solvent     | CDC13      | gain       | not used |
| file        |            | exp        | spin     |
| ACQUISITION |            | hst        | 0.008    |
| sw          | 6389.8     | pw90       | 19.700   |
| at          | 1.998      | alfa       | 20.000   |
| np          | 25528      | FLAGS      |          |
| fb          | not used   | il         | n        |
| bs          | 8          | in         | n        |
| d1          | 1.000      | dp         | y        |
| nt          | 100        | hs         | nn       |
| ct          | 100        | PROCESSING |          |
| TRANSMITTER |            | lb         | 0.10     |
| tn          | H1         | fn         | 65536    |
| sfrq        |            | DISPLAY    |          |
| tof         | 399.853    | sp         | -208.5   |
| tpwr        | 362.8      | wp         | 3635.7   |
| pw          | 57         | rfl        | 796.2    |
| DECOUPLER   |            | rfp        | 0        |
| dn          | C13        | rp         | 122.7    |
| dof         | 0          | lp         | -95.2    |
| dm          |            | PLOT       |          |
| dmm         | nnn        | wc         | 250      |
| dpwr        | 50         | sc         | 0        |
| dmf         | 15900      | vs         | 62       |
|             |            | th         | 14       |
|             |            | nm         | cdc ph   |

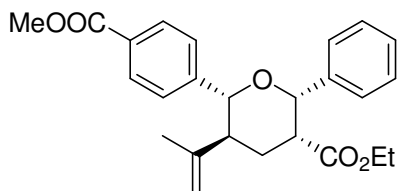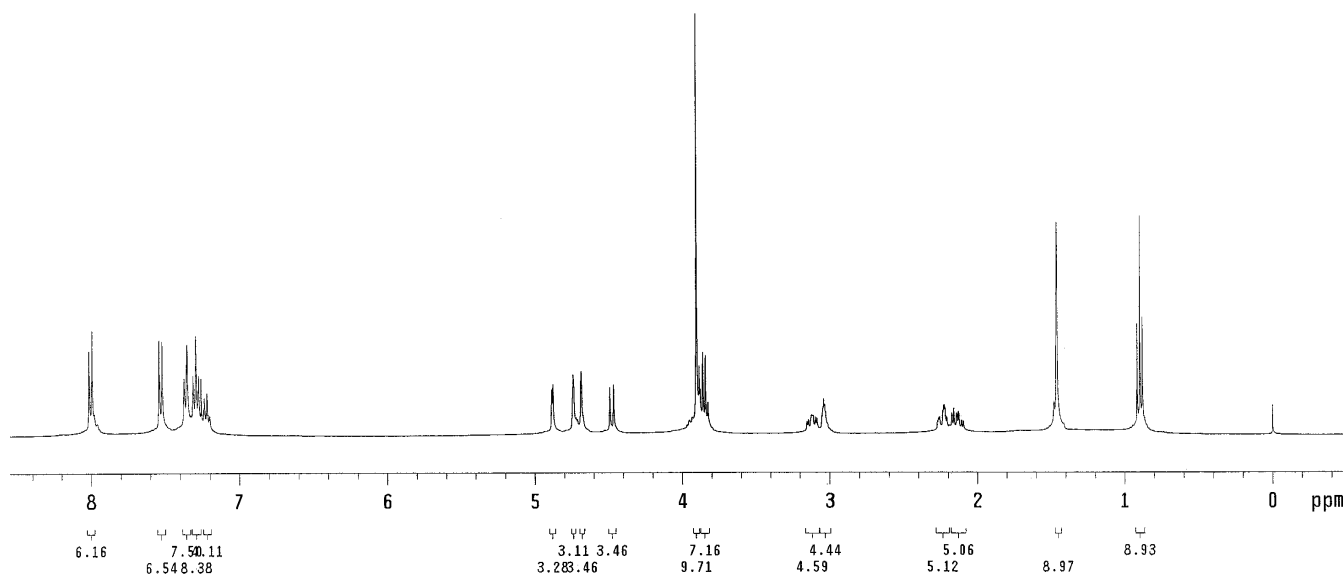

### <sup>13</sup>C NMR spectra of 12d

PS\_493\_M

exp1 s2pu1

| SAMPLE      |            | SPECIAL    |          |
|-------------|------------|------------|----------|
| date        | Jun 7 2011 | temp       | not used |
| solvent     | CDCl3      | gain       | not used |
| file        |            | spin       | not used |
| ACQUISITION | exp        | hst        | 0.008    |
| sw          | 25125.6    | pw90       | 18.600   |
| at          | 1.199      | alfa       | 20.000   |
| np          | 60270      | FLAGS      |          |
| fb          | 13800      | il         | n        |
| bs          | 16         | in         | n        |
| d1          | 1.000      | dp         | y        |
| nt          | 4000       | hs         | nn       |
| ct          | 864        | PROCESSING |          |
| TRANSMITTER | lb         | lb         | 2.00     |
| tn          | C13        | fn         | 65536    |
| sfrq        | 100.554    | DISPLAY    |          |
| tof         | 1536.3     | sp         | -623.1   |
| tpwr        | 61         | wp         | 21361.4  |
| pw          | 9.300      | rfl        | 9279.0   |
| DECOUPLER   | rfl        | rfl        | 7764.9   |
| dn          | H1         | rp         | -71.4    |
| dof         | 0          | lp         | -277.0   |
| dm          | yyy        | PLOT       |          |
| dmm         | w          | wc         | 250      |
| dpwr        | 42         | sc         | 0        |
| dmf         | 8900       | vs         | 39       |
|             | th         | th         | 4        |
|             | nm         | no         | ph       |

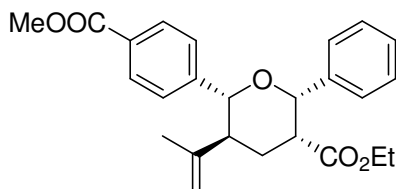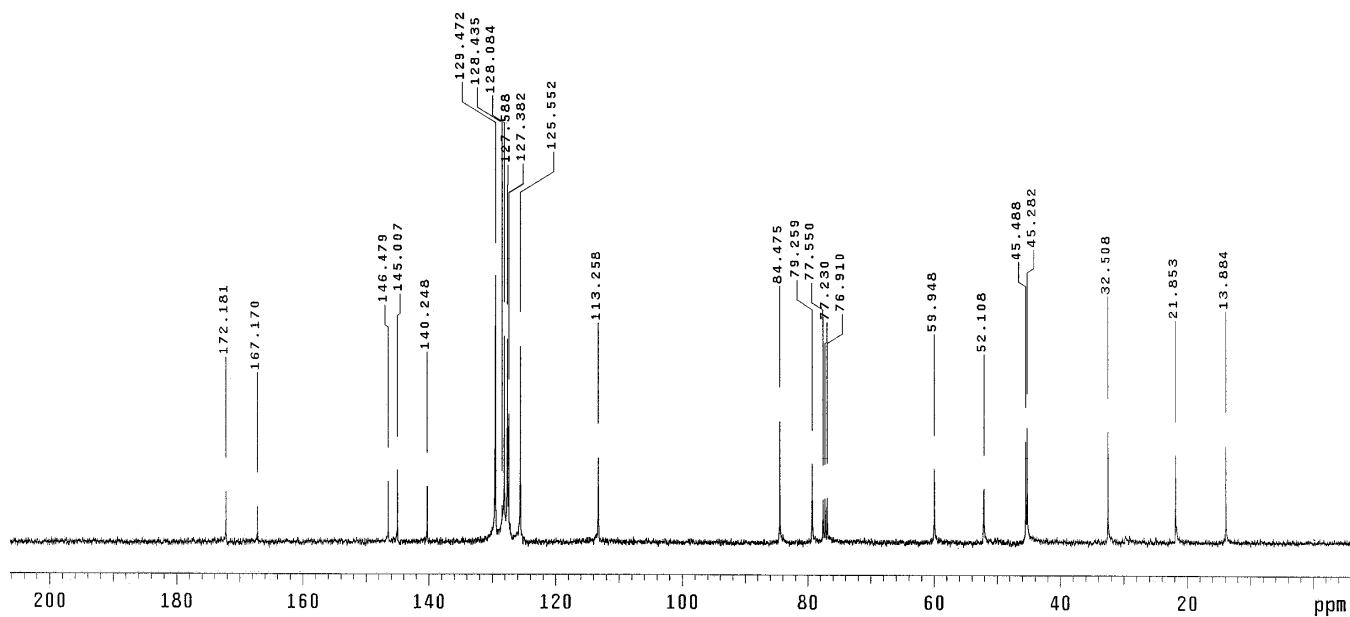

### <sup>1</sup>H NMR spectra of 12e

```
PS_411_M
exp1 s2pu1

SAMPLE
date Dec 22 2010 temp not used
solvent CDCl3 gain not used
file /export/home/~ spin not used
ciftemp/AKS_PS_411~ hst 0.008
_M.fid pw90 19.700
ACQUISITION alfa 20.000

sw 6389.8
at 1.998 il
np 25528 in
fb not used dp
bs 8 hs
d1 1.000 PROCESSING
nt 100 lb 0.10
ct 100 fn 65536

TRANSMITTER H1 sp
tn H1 sp -175.1
sfrq 399.853 wp 3568.4
tof 362.8 rfl 796.4
tpwr 57 rfp 0
pw 9.850 rp 119.8
DECOUPLER lp -83.9

dn C13 PLOT
dof 0 wc 250
dm nnn sc 0
dmm c vs 37
dpwr 50 th
dmf 15900 nm cdc ph
```

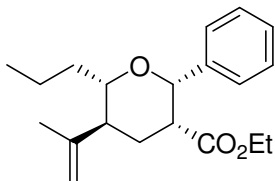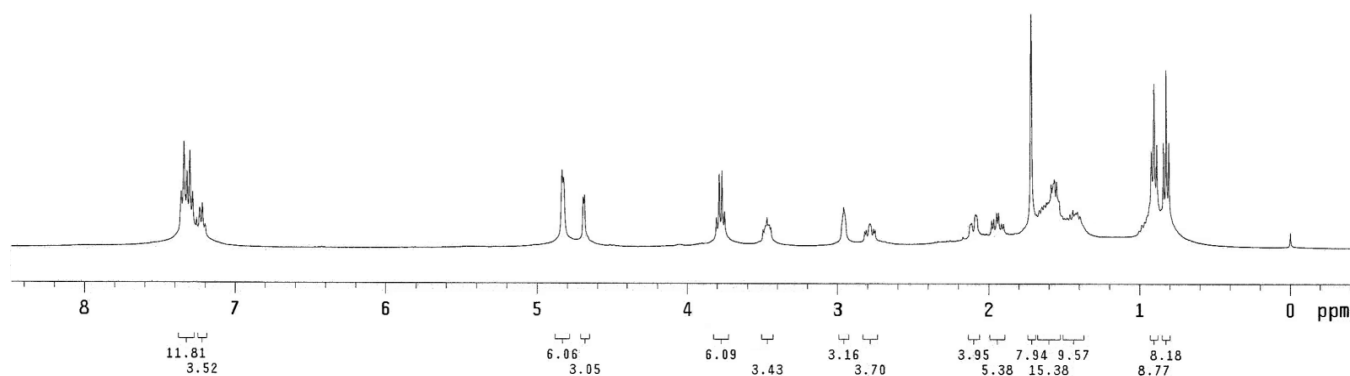

### <sup>13</sup>C NMR spectra of 12e

PS\_411\_M

exp1 s2pu1

| SAMPLE              |                | SPECIAL    |          |
|---------------------|----------------|------------|----------|
| date                | Dec 22 2010    | temp       | not used |
| solvent             | CDCl3          | gain       | not used |
| file                | /export/home/~ | spin       | not used |
| ciftemp/AKS_PS_411~ | hst            | 0.008      |          |
| M_C13.fid           | pw90           | 18.600     |          |
| ACQUISITION         | alfa           | 20.000     |          |
| sw                  | 25125.6        | FLAGS      |          |
| at                  | 1.199          | il         | n        |
| np                  | 60270          | in         | n        |
| fb                  | 13800          | dp         | y        |
| bs                  | 16             | hs         | nn       |
| d1                  | 1.000          | PROCESSING |          |
| nt                  | 3000           | lb         | 2.00     |
| ct                  | 992            | fn         | 65536    |
| TRANSMITTER         | C13            | DISPLAY    |          |
| tn                  |                | sp         | -390.7   |
| sfrq                | 100.554        | wp         | 21229.5  |
| tof                 | 1536.3         | rfl        | 9277.5   |
| tpwr                | 61             | rffp       | 7764.9   |
| pw                  | 9.300          | rp         | -51.8    |
| DECOUPLER           | H1             | lp         | -300.3   |
| dn                  |                | PLOT       |          |
| dof                 | 0              | wc         | 250      |
| dm                  | YVY            | sc         | 0        |
| dmm                 | w              | vs         | 44       |
| dpwr                | 42             | th         | 4        |
| dmf                 | 8900           | nm         | no ph    |

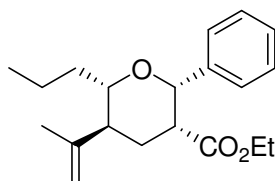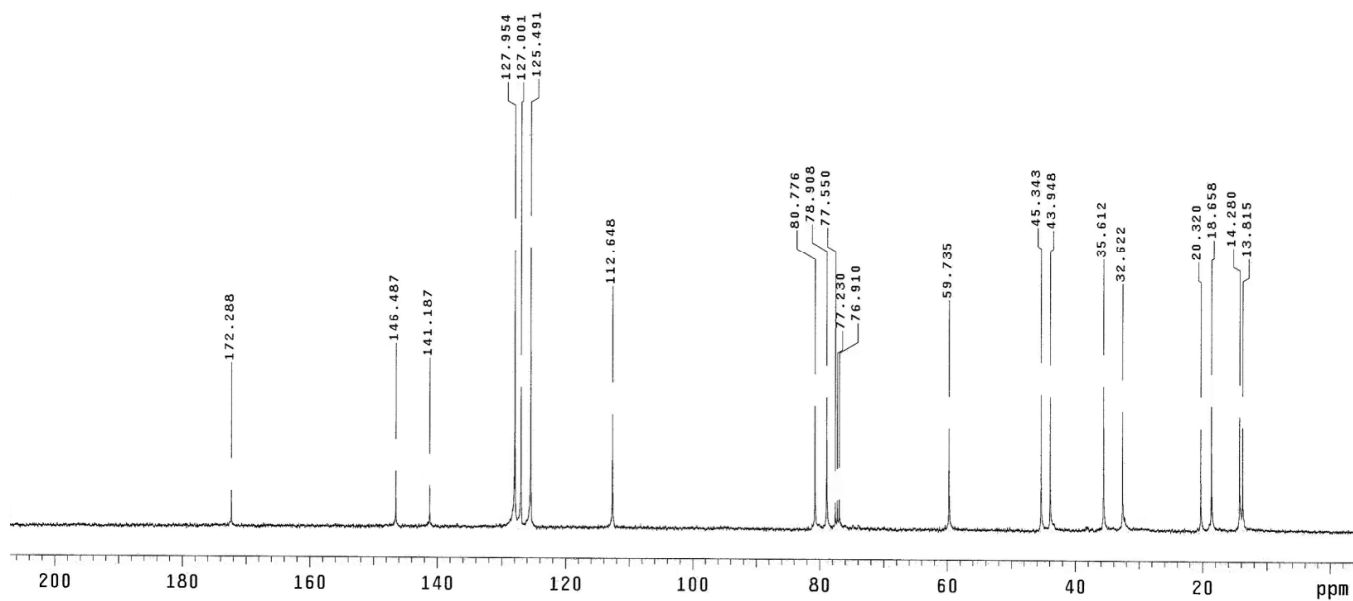

### <sup>1</sup>H NMR spectra of 12f

PS\_452\_M

exp1 s2pu1

| SAMPLE      |                | SPECIAL    |          |
|-------------|----------------|------------|----------|
| date        | Feb 23 2011    | temp       | not used |
| solvent     | CDC13          | gain       | not used |
| file        | /export/home/~ | spin       | not used |
| ciftemp     | AKS_PS_452~    | hst        | 0.008    |
|             | ~.M.fid        | pw90       | 19.700   |
|             |                | alfa       | 20.000   |
| ACQUISITION |                | FLAGS      |          |
| sw          | 6389.8         |            |          |
| at          | 1.998          | il         | n        |
| np          | 25528          | in         | n        |
| fb          | not used       | dp         | y        |
| bs          | 8              | hs         | nn       |
| d1          | 1.000          | PROCESSING |          |
| nt          | 100            | lb         | 0.10     |
| ct          | 100            | fn         | 65536    |
| TRANSMITTER |                | DISPLAY    |          |
| tn          | H1             | sp         | -181.4   |
| sfrq        | 399.853        | wp         | 3593.6   |
| tof         | 362.8          | rfl        | 794.3    |
| tpwr        | 57             | rfp        | 0        |
| pw          | 9.850          | rp         | 114.1    |
|             |                | lp         | -91.7    |
| DECOUPLER   |                | PLOT       |          |
| dn          | C13            | wc         | 250      |
| dof         | 0              | sc         | 0        |
| dm          | nnn            | vs         | 43       |
| dmm         | c              | th         | 20       |
| dpwr        | 50             | cdc        | ph       |
| dmf         | 15900          |            |          |

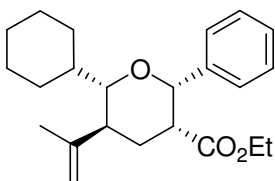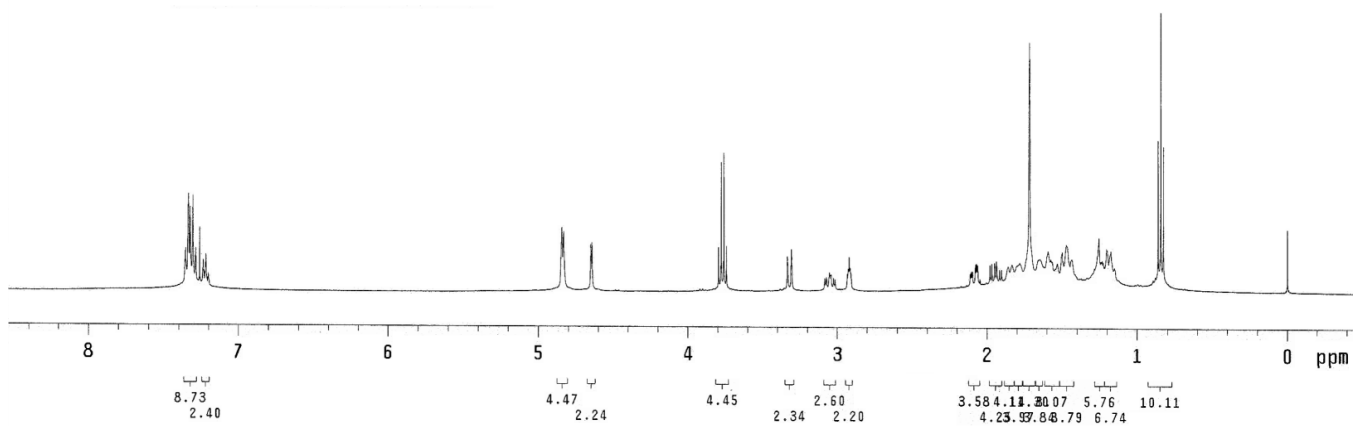

### <sup>13</sup>C NMR spectra of 12f

PS\_452\_M

exp1 s2pu1

| SAMPLE      |                | SPECIAL    |          |
|-------------|----------------|------------|----------|
| date        | Feb 23 2011    | temp       | not used |
| solvent     | CDCl3          | gain       | not used |
| file        | /export/home/~ | spin       | not used |
| ciftemp     | AKS_PS_452~    | hst        | 0.008    |
| M_C13.fid   |                | pw90       | 18.600   |
| ACQUISITION | alfa           |            | 20.000   |
| sw          | 25125.6        | FLAGS      |          |
| at          | 1.199          | l1         | n        |
| np          | 60270          | in         | n        |
| fb          | 13800          | dp         | y        |
| bs          | 16             | hs         | nn       |
| d1          | 1.000          | PROCESSING |          |
| nt          | 5000           | lb         | 2.00     |
| ct          | 2080           | fn         | 65536    |
| TRANSMITTER | C13            | DISPLAY    |          |
| tn          |                | sp         | -549.5   |
| sfrq        | 100.554        | wp         | 21460.3  |
| tof         | 1536.3         | rfl        | 9271.3   |
| tpwr        | 61             | rfp        | 7764.9   |
| pw          | 9.300          | rp         | -61.1    |
| DECOUPLER   | H1             | lp         | -302.7   |
| dn          |                | PLOT       |          |
| dof         | 0              | wc         | 250      |
| dm          | yyy            | sc         | 0        |
| dmm         | w              | vs         | 21       |
| dpwr        | 42             | th         | 3        |
| dmf         | 8900           | nm         | no ph    |

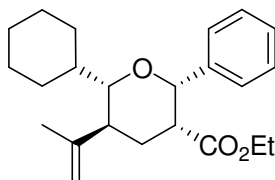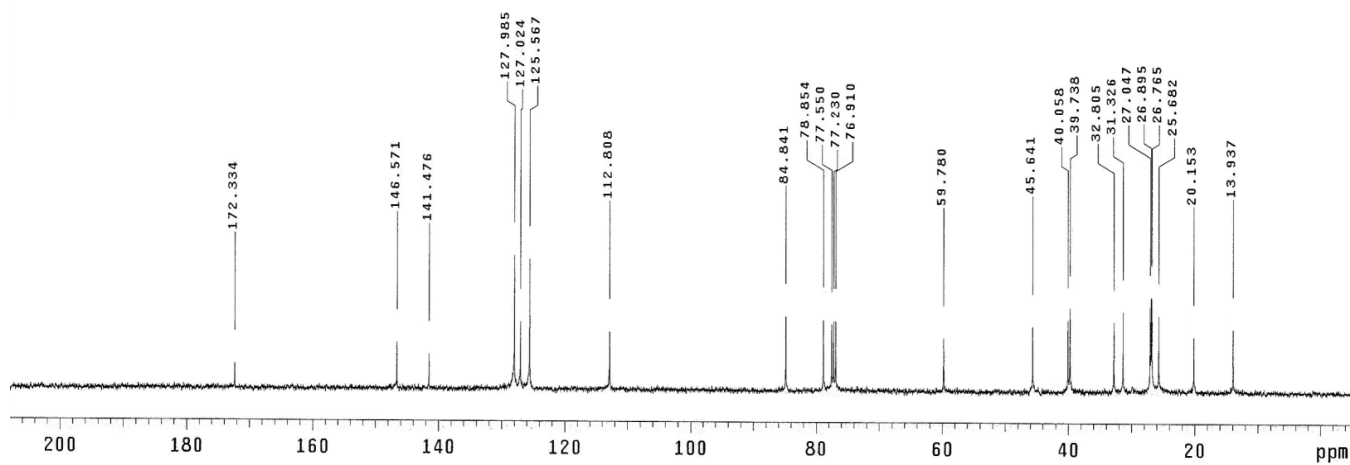



### <sup>1</sup>H NMR spectra of 13

PS\_451\_L

exp1 s2pu1

| SAMPLE      |                | SPECIAL    |          |
|-------------|----------------|------------|----------|
| date        | Feb 19 2011    | temp       | not used |
| solvent     | CDCl3          | gain       | not used |
| file        | /export/home/~ | spin       | not used |
| ciftemp     | AKS_PS_451~    | hst        | 0.008    |
|             | L.fid          | pw90       | 19.700   |
| ACQUISITION | alfa           |            | 20.000   |
| sw          | 6389.8         | FLAGS      |          |
| at          | 1.998          | il         | n        |
| np          | 25528          | in         | n        |
| fb          | not used       | dp         | y        |
| bs          | 8              | hs         | nn       |
| d1          | 1.000          | PROCESSING |          |
| nt          | 200            | lb         | 0.10     |
| ct          | 0              | fn         | 65536    |
| TRANSMITTER |                | DISPLAY    |          |
| tn          | H1             | sp         | -199.5   |
| sfrq        | 399.853        | wp         | 3602.0   |
| tof         | 362.8          | rfl        | 795.6    |
| tpwr        | 57             | rfp        | 0        |
| pw          | 9.850          | rp         | 106.5    |
| DECOUPLER   |                | lp         | -67.6    |
| dn          | C13            | PLOT       |          |
| dof         | 0              | wc         | 250      |
| dm          | nnn            | sc         | 0        |
| dmm         | c              | vs         | 36       |
| dpwr        | 50             | th         | 25       |
| dmf         | 15900          | nm         | cdc ph   |

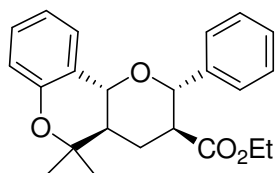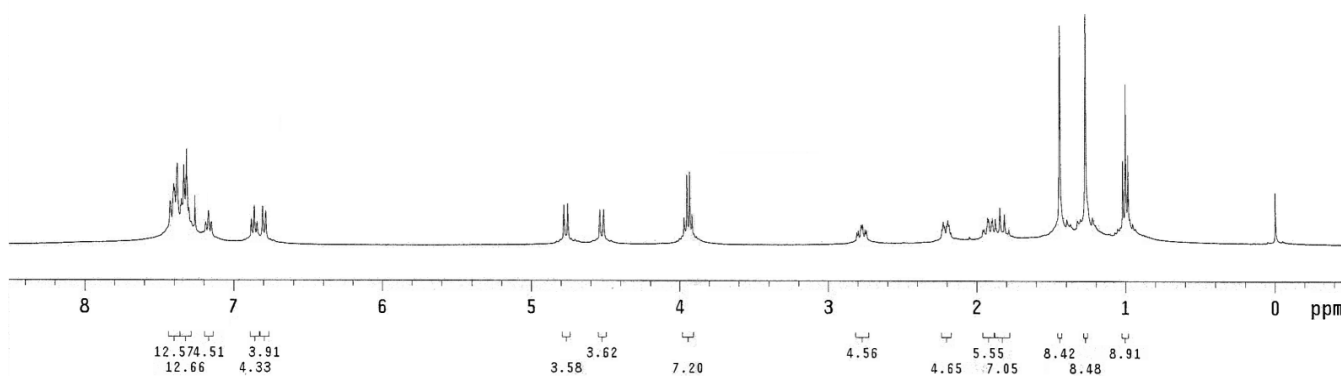

### <sup>13</sup>C NMR spectra of 13

PS\_451\_L

exp1 s2pu1

| SAMPLE              |                | SPECIAL    |          |
|---------------------|----------------|------------|----------|
| date                | Feb 19 2011    | temp       | not used |
| solvent             | CDCl3          | gain       | not used |
| file                | /export/home/~ | spin       | not used |
| ciftemp/AKS_PS_451~ | L_C13.fid      | hst        | 0.008    |
| ACQUISITION         | alfa           | pw90       | 18.600   |
| sw                  | 25125.6        | alpha      | 20.000   |
| at                  | 1.199          | il         | n        |
| np                  | 60270          | in         | n        |
| fb                  | 13800          | dp         | y        |
| bs                  | 16             | hs         | nn       |
| d1                  | 1.000          | PROCESSING |          |
| nt                  | 5000           | lb         | 2.00     |
| ct                  | 0              | fn         | 65536    |
| tn                  | TRANSMITTER    | C13        | sp       |
| sfrq                | 100.554        | wp         | -554.1   |
| tof                 | 1536.3         | rfl        | 21394.4  |
| tpwr                | 61             | rfp        | 9275.9   |
| pw                  | 9.300          | rp         | 7764.9   |
| DECOUPLER           | H1             | lp         | -49.0    |
| dn                  | 0              | PLOT       | -333.6   |
| dof                 | 0              | wc         | 250      |
| dm                  | yyy            | sc         | 0        |
| dmm                 | w              | vs         | 31       |
| dpr                 | 42             | th         | 3        |
| dmi                 | 8900           | nm         | no ph    |

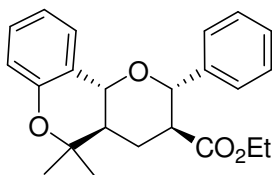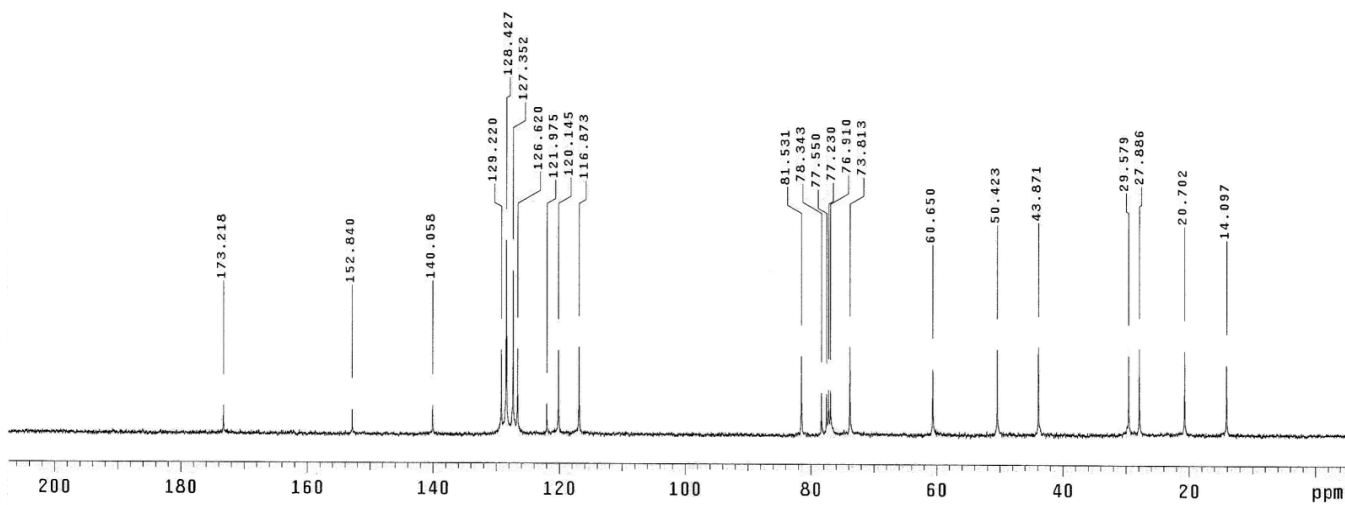

## <sup>1</sup>H NMR spectra of 14

PS\_433\_L

exp1 s2pu1

| SAMPLE      |                | SPECIAL    |          |
|-------------|----------------|------------|----------|
| date        | Feb 14 2011    | temp       | not used |
| solvent     | CDCl3          | gain       | not used |
| file        | /export/home/~ | spin       | not used |
| ciftemp     | AKS_PS_433     | hst        | 0.008    |
|             | l1.fid         | pw90       | 19.700   |
|             |                | alpha      | 20.000   |
| ACQUISITION |                | FLAGS      |          |
| sw          | 6389.8         | il         | n        |
| at          | 1.998          | in         | n        |
| np          | 25528          | dp         | y        |
| fb          | not used       | hs         | nn       |
| bs          | 4              |            |          |
| d1          | 1.000          | PROCESSING |          |
| nt          | 32             | lb         | 0.10     |
| ct          | 32             | fn         | 65536    |
| TRANSMITTER |                | DISPLAY    |          |
| tn          | H1             | sp         | -180.8   |
| sfrq        | 399.853        | wp         | 3576.8   |
| tof         | 362.8          | rfl        | 810.4    |
| tpwr        | 57             | rfl        | 0        |
| pw          | 9.850          | rp         | 129.6    |
|             |                | lp         | -97.3    |
| DECOUPLER   |                | PLOT       |          |
| dn          | C13            | wc         | 250      |
| dof         | 0              | sc         | 0        |
| dm          | nnn            | vs         | 62       |
| dmm         | c              | th         | 20       |
| dpwr        | 50             | cdc        | ph       |
| dmf         | 15900          |            |          |

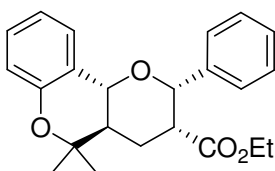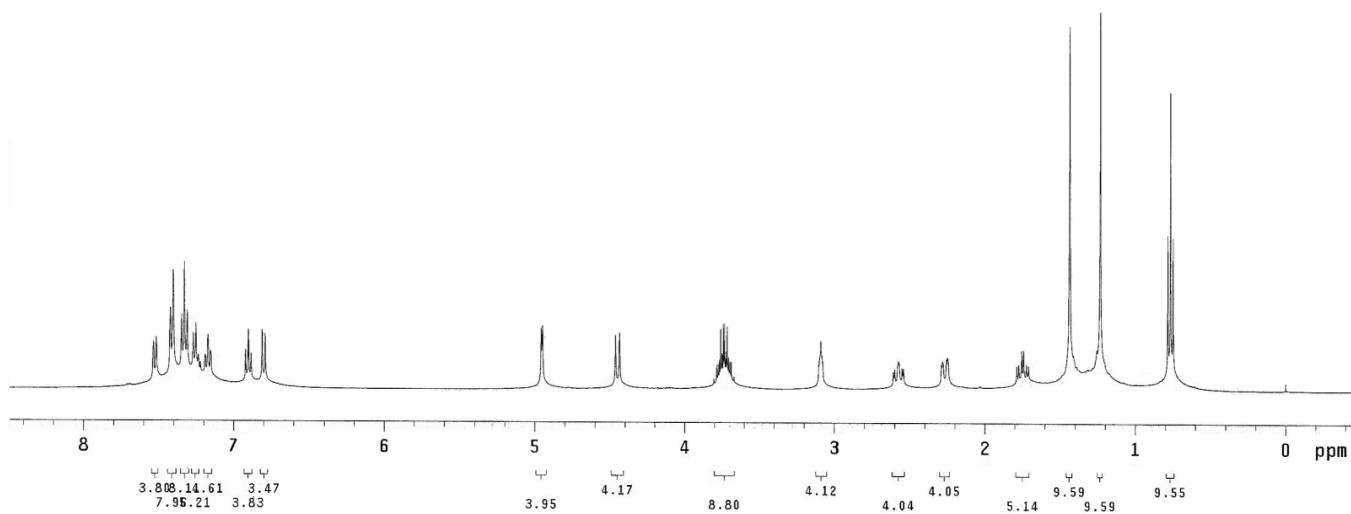

### <sup>13</sup>C NMR spectra of 14

```
PS_433_L1
exp1 s2pu1

SAMPLE
date Feb 21 2011 temp not used
solvent CDCl3 gain not used
file /export/home/~ spin not used
ciftemp/AKS_PS_433~ hst 0.008
Li_D13.fid pw90 18.600
ACQUISITION alfa 20.000

sw 25125.6 FLAGS
at 1.199 il n
np 60270 in n
fb 13800 dp y
bs 16 hs nn
d1 1.000 PROCESSING
nt 3000 lb 2.00
ct 3000 fn 65536

TRANSMITTER DISPLAY
tn C13 sp -358.5
sfrq 100.554 wp 20932.0
tof 1536.3 rfi 9279.0
tpwr 61 rfp 7764.9
pw 9.300 rp -77.9
DECOUPLER lp -269.1

dn H1 PLOT
dof 0 wc 250
dm yyv sc 0
dmm w vs 34
dpwr 42 th 4
dmf 8900 nm no ph
```

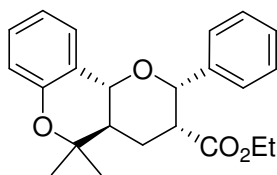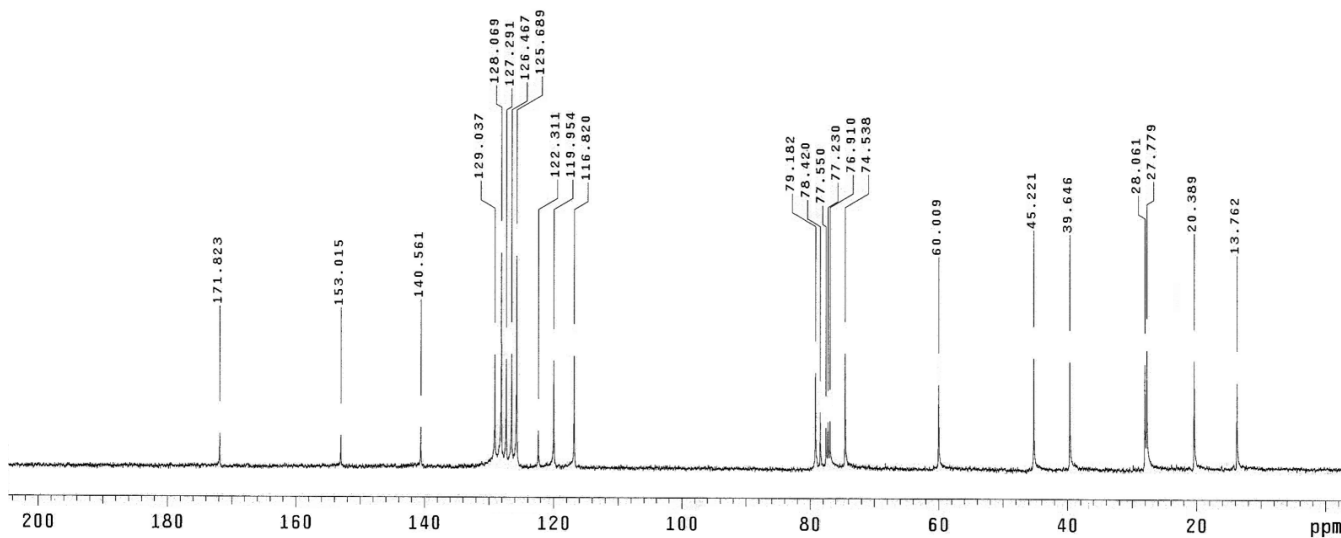

### The crystal parameters of compound **4g**

|                                                     | <b>4g-CCDC 819363</b>                          |
|-----------------------------------------------------|------------------------------------------------|
| Formula                                             | C <sub>20</sub> H <sub>26</sub> O <sub>5</sub> |
| Formula weight                                      | 346.41                                         |
| <i>T</i> /K                                         | 296(2)                                         |
| Crystal system                                      | Orthorhombic                                   |
| Space group                                         | P n a 21                                       |
| <i>a</i> /Å                                         | 19.8370(10)                                    |
| <i>b</i> /Å                                         | 15.2026(8)                                     |
| <i>c</i> /Å                                         | 6.3744(4)                                      |
| <i>α</i> /°                                         | 90.00                                          |
| <i>β</i> /°                                         | 90.00                                          |
| <i>γ</i> /°                                         | 90.00                                          |
| <i>V</i> /Å <sup>3</sup>                            | 1922.35(18)                                    |
| <i>Z</i>                                            | 4                                              |
| Abs. Coeff./mm <sup>-1</sup>                        | 0.085                                          |
| Abs. Correction                                     | multi-scan                                     |
| GOF on <i>F</i> <sup>2</sup>                        | 0.943                                          |
| Final <i>R</i> indices [ <i>I</i> > 2σ( <i>I</i> )] | <i>R</i> 1 = 0.0677<br><i>wR</i> 2 = 0.1644    |
| <i>R</i> indices [all data]                         | <i>R</i> 1 = 0.0856<br><i>wR</i> 2 = 0.1735    |

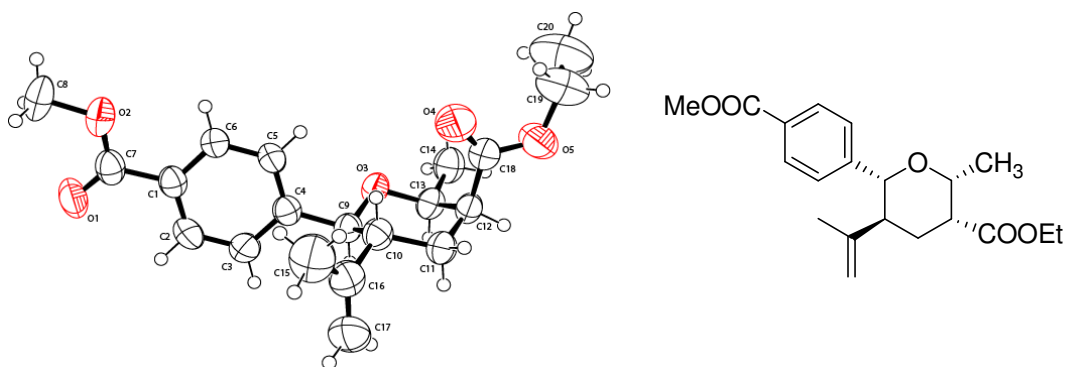

**Figure 1:** ORTEP diagram of **4g**

### The crystal parameters of compound **11f**

|                                                     | <b>11f-CCDC 819365</b>                         |
|-----------------------------------------------------|------------------------------------------------|
| Formula                                             | C <sub>25</sub> H <sub>28</sub> O <sub>5</sub> |
| Formula weight                                      | 408.47                                         |
| <i>T</i> /K                                         | 296(2)                                         |
| Crystal system                                      | Monoclinic                                     |
| Space group                                         | P 21/c                                         |
| <i>a</i> /Å                                         | 12.0752(3)                                     |
| <i>b</i> /Å                                         | 15.3970(4)                                     |
| <i>c</i> /Å                                         | 12.4647(3)                                     |
| $\alpha$ /°                                         | 90.00                                          |
| $\beta$ /°                                          | 104.3910(10)                                   |
| $\gamma$ /°                                         | 90.00                                          |
| <i>V</i> /Å <sup>3</sup>                            | 2244.74(10)                                    |
| <i>Z</i>                                            | 4                                              |
| Abs. Coeff./mm <sup>-1</sup>                        | 0.083                                          |
| Abs. Correction                                     | multi-scan                                     |
| GOF on <i>F</i> <sup>2</sup>                        | 1.070                                          |
| Final <i>R</i> indices [ <i>I</i> > 2σ( <i>I</i> )] | <i>R</i> 1 = 0.0615<br><i>wR</i> 2 = 0.1806    |
| <i>R</i> indices [all data]                         | <i>R</i> 1 = 0.0759<br><i>wR</i> 2 = 0.2203    |

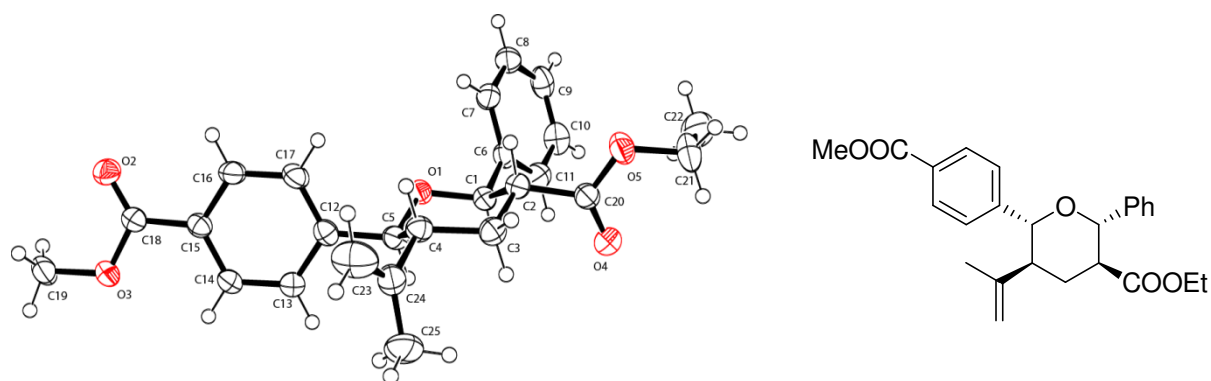

**Figure 2:** ORTEP diagram of **11f**

### The crystal parameters of compound 13

|                                                     | 13-CCDC 819364                                 |
|-----------------------------------------------------|------------------------------------------------|
| Formula                                             | C <sub>23</sub> H <sub>26</sub> O <sub>4</sub> |
| Formula weight                                      | 366.44                                         |
| <i>T</i> /K                                         | 296(2)                                         |
| Crystal system                                      | Monoclinic                                     |
| Space group                                         | P 21/n                                         |
| <i>a</i> /Å                                         | 8.9913(7)                                      |
| <i>b</i> /Å                                         | 19.6654(14)                                    |
| <i>c</i> /Å                                         | 11.4452(9)                                     |
| $\alpha$ /°                                         | 90.00                                          |
| $\beta$ /°                                          | 103.239(4)                                     |
| $\gamma$ /°                                         | 90.00                                          |
| <i>V</i> /Å <sup>3</sup>                            | 1969.9(3)                                      |
| <i>Z</i>                                            | 4                                              |
| Abs. Coeff./mm <sup>-1</sup>                        | 0.084                                          |
| Abs. Correction                                     | Multi-scan                                     |
| GOF on <i>F</i> <sup>2</sup>                        | 1.064                                          |
| Final <i>R</i> indices [ <i>I</i> > 2σ( <i>I</i> )] | <i>R</i> 1 = 0.0667<br><i>wR</i> 2 = 0.1815    |
| <i>R</i> indices [all data]                         | <i>R</i> 1 = 0.0923<br><i>wR</i> 2 = 0.1973    |

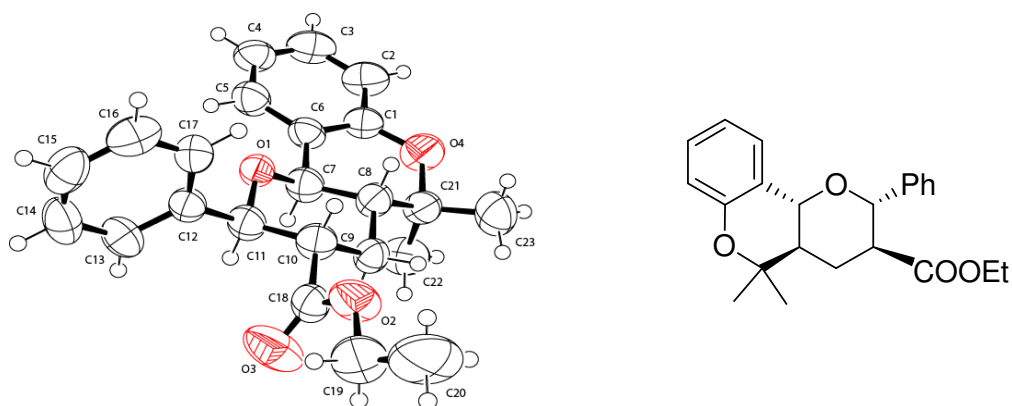

Figure 3: ORTEP diagram of 13

### The crystal parameters of compound 14

|                                                     | 14-CCDC 819366                                 |
|-----------------------------------------------------|------------------------------------------------|
| Formula                                             | C <sub>23</sub> H <sub>26</sub> O <sub>4</sub> |
| Formula weight                                      | 366.44                                         |
| <i>T</i> /K                                         | 296(2)                                         |
| Crystal system                                      | Monoclinic                                     |
| Space group                                         | P 21/c                                         |
| <i>a</i> /Å                                         | 12.5282(8)                                     |
| <i>b</i> /Å                                         | 8.7884(6)                                      |
| <i>c</i> /Å                                         | 18.2013(12)                                    |
| $\alpha$ /°                                         | 90.00                                          |
| $\beta$ /°                                          | 94.582(2)                                      |
| $\gamma$ /°                                         | 90.00                                          |
| <i>V</i> /Å <sup>3</sup>                            | 1997.6(2)                                      |
| <i>Z</i>                                            | 4                                              |
| Abs. Coeff./mm <sup>-1</sup>                        | 0.082                                          |
| Abs. Correction                                     | Multi-scan                                     |
| GOF on <i>F</i> <sup>2</sup>                        | 1.373                                          |
| Final <i>R</i> indices [ <i>I</i> > 2σ( <i>I</i> )] | <i>R</i> 1 = 0.0613<br><i>wR</i> 2 = 0.1695    |
| <i>R</i> indices [all data]                         | <i>R</i> 1 = 0.0967<br><i>wR</i> 2 = 0.2108    |

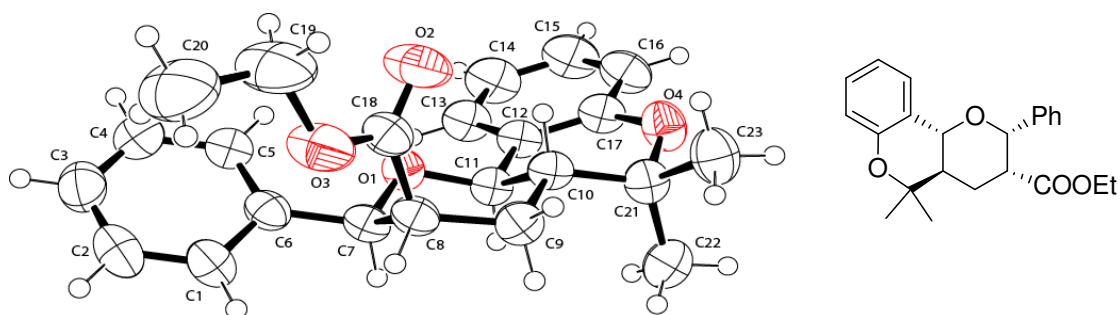

Figure 4: ORTEP diagram of 14
